# Supplementary material for: Evolutionary recruitment of flexible Esrp-dependent splicing programs into diverse embryonic morphogenetic processes
Source: PubMed Central journal article supplement (PMC5703972; doi:10.1038/s41467-017-01961-y), 2017-11-27
Supplement: 41467_2017_1961_MOESM1_ESM.pdf [file 41467_2017_1961_MOESM1_ESM.pdf]

**Supplementary Materials for:**

**Evolutionary recruitment of flexible *Esrp*-dependent splicing programs into diverse embryonic morphogenetic processes**

Demian Burguera, Yamile Marquez, Claudia Racioppi, Jon Permanyer, Antonio Torres, Rosaria Esposito, Beatriz Albuixech-Crespo, Lucía Fanlo, Ylenia D'Agostino, Andre Gohr, Enrique Navas-Perez, Ana Riesgo, Claudia Cuomo, Giovanna Benvenuto, Lionel A. Christiaen, Elisa Martí, Salvatore D'Aniello, Antonietta Spagnuolo, Filomena Ristoratore, Maria Ina Arnone, Jordi Garcia-Fernández, Manuel Irimia

**Supplementary Table 1.** This table contains the 22 clusters of homologous exons that were detected as *Esrp*-dependent in zebrafish, human and mouse. ESRP\_DEP-SIL, *Esrp*-dependent exon upregulated upon *Esrp* KD; ESRP\_DEP-ENH, *Esrp*-dependent exon downregulated upon *Esrp* KD; NR, non-*Esrp* regulated; NC, not sufficient read coverage to estimate changes in PSI; AS, alternatively spliced (PSI between 10 and 90); HIGH\_PSI, constitutively spliced (PSI higher than 90); NI, no information available.

| Cluster ID  | Species | Gene ID            | Gene name | Exon genomic coordinates | Exon size | Vast-tools ID | ESRP_DEP     | Exon type |
|-------------|---------|--------------------|-----------|--------------------------|-----------|---------------|--------------|-----------|
| CL010896.01 | Dre     | ENSDARG00000078675 | dock7     | chr6:32379767-32379859   | 93        | DreEX0028016  | ESRP_DEP-SIL | AS        |
| CL010896.01 | Hsa     | ENSG00000116641    | DOCK7     | chr1:63010618-63010710   | 93        | HsaEX0020639  | ESRP_DEP-SIL | AS        |
| CL010896.01 | Mmu     | ENSMUSG00000028556 | Dock7     | chr4:98660338-98660427   | 90        | MmuEX0015458  | ESRP_DEP-SIL | AS        |
| CL004509.01 | Dre     | ENSDARG00000010155 | abila     | chr24:5976265-5976351    | 87        | DreEX0010307  | NR           | AS        |
| CL004509.01 | Dre     | ENSDARG00000014875 | abi2b     | chr6:9770304-9770390     | 87        | DreEX0010332  | ESRP_DEP-SIL | AS        |
| CL004509.01 | Hsa     | ENSG00000138443    | ABI2      | chr2:204276008-204276094 | 87        | HsaEX0000647  | NR           | AS        |
| CL004509.01 | Hsa     | ENSG00000136754    | ABI1      | chr10:27044584-27044670  | 87        | HsaEX0000644  | ESRP_DEP-SIL | AS        |
| CL004509.01 | Mmu     | ENSMUSG00000058835 | Abi1      | chr2:22805704-22805790   | 87        | MmuEX0003244  | ESRP_DEP-SIL | AS        |
| CL010468.01 | Dre     | ENSDARG00000020488 | arhgap17a | chr12:20352804-20353067  | 264       | DreEX0014246  | ESRP_DEP-SIL | AS        |
| CL010468.01 | Hsa     | ENSG00000140750    | ARHGAP17  | chr16:24950685-24950918  | 234       | HsaEX0005421  | ESRP_DEP-SIL | AS        |
| CL010468.01 | Mmu     | ENSMUSG00000030766 | Arhgap17  | chr7:130437986-130438219 | 234       | MmuEX0005800  | ESRP_DEP-SIL | AS        |
| CL016338.02 | Dre     | ENSDARG00000078233 | ctnnd1    | chr1:43494933-43495084   | 152       | NA            | ESRP_DEP-SIL | AS        |
| CL016338.02 | Hsa     | ENSG00000198561    | CTNND1    | chr11:57558857-57559145  | 289       | HsaEX0017869  | ESRP_DEP-SIL | AS        |
| CL016338.02 | Mmu     | ENSMUSG00000034101 | Ctnnd1    | chr2:84464427-84464715   | 289       | MmuEX0013073  | ESRP_DEP-SIL | AS        |
| CL014001.01 | Dre     | ENSDARG00000012078 | meis1b    | chr13:5367347-5367440    | 94        | DreEX0045964  | ESRP_DEP-SIL | AS        |
| CL014001.01 | Hsa     | ENSG00000143995    | MEIS1     | chr2:66796182-66796277   | 96        | HsaEX0038792  | ESRP_DEP-SIL | AS        |
| CL014001.01 | Mmu     | ENSMUSG00000020160 | Meis1     | chr11:18783991-18784085  | 95        | MmuEX0028623  | ESRP_DEP-SIL | AS        |
| CL008378.29 | Dre     | ENSDARG00000009499 | syne1a    | chr20:26450144-26450212  | 69        | DreEX0076807  | ESRP_DEP-SIL | AS        |
| CL008378.29 | Hsa     | ENSG00000131018    | SYNE1     | chr6:152466622-152466690 | 69        | HsaEX0063158  | ESRP_DEP-SIL | AS        |

|             |     |                     |            |                            |     |              |              |          |
|-------------|-----|---------------------|------------|----------------------------|-----|--------------|--------------|----------|
| CL008378.29 | Mmu | ENSMUSG00000019769  | Syne1      | chr10:5301207-5301275      | 69  | MmuEX0045949 | ESRP_DEP-SIL | AS       |
| CL012712.01 | Dre | ENSDARG00000011027  | fgfr1a     | chr8:51473548-51473695     | 148 | DreEX0032641 | ESRP_DEP-ENH | AS       |
| CL012712.01 | Dre | ENSDARG00000011027  | fgfr1a     | chr8:51468017-51468161     | 145 | DreEX0032642 | ESRP_DEP-SIL | AS       |
| CL012712.01 | Dre | ENSDARG00000011190  | fgfr1b     | chr10:42810564-42810714    | 151 | DreEX0032649 | LC           | AS       |
| CL012712.01 | Dre | ENSDARG00000011190  | fgfr1b     | chr10:42811058-42811202    | 145 | NA           | LC           | AS       |
| CL012712.01 | Dre | ENSDARG00000004782  | fgfr3      | chr13:13108015-13108159    | 145 | DreEX0032695 | LC           | AS       |
| CL012712.01 | Dre | ENSDARG00000004782  | fgfr3      | chr13:13106931-13107075    | 145 | DreEX0032696 | ESRP_DEP-SIL | AS       |
| CL012712.01 | Dre | ENSDARG000000058115 | fgfr2      | chr13:46214695-46214839    | 145 | DreEX0032684 | ESRP_DEP-SIL | AS       |
| CL012712.01 | Dre | ENSDARG000000058115 | fgfr2      | chr13:46216912-46217050    | 139 | DreEX0032683 | ESRP_DEP-ENH | AS       |
| CL012712.01 | Hsa | ENSG00000066468     | FGFR2      | chr10:123278196-123278343  | 148 | HsaEX0025678 | ESRP_DEP-ENH | AS       |
| CL012712.01 | Hsa | ENSG00000066468     | FGFR2      | chr10:123276833-123276977  | 145 | HsaEX0025679 | ESRP_DEP-SIL | AS       |
| CL012712.01 | Hsa | ENSG00000068078     | FGFR3      | chr4:1804641-1804791       | 151 | HsaEX0025686 | ESRP_DEP-SIL | AS       |
| CL012712.01 | Hsa | ENSG00000068078     | FGFR3      | chr4:1805419-1805563       | 145 | HsaEX0025687 | ESRP_DEP-SIL | AS       |
| CL012712.01 | Hsa | ENSG00000077782     | FGFR1      | chr8:38280543-38280693     | 151 | HsaEX0025665 | ESRP_DEP-ENH | AS       |
| CL012712.01 | Hsa | ENSG00000077782     | FGFR1      | chr8:38279315-38279459     | 145 | NA           | LC           | AS       |
| CL012712.01 | Mmu | ENSMUSG00000030849  | Fgfr2      | chr7:137343272-137343419   | 148 | NA           | ESRP_DEP-ENH | AS       |
| CL012712.01 | Mmu | ENSMUSG00000030849  | Fgfr2      | chr7:137341933-137342077   | 145 | MmuEX0019159 | ESRP_DEP-SIL | AS       |
| CL012712.01 | Mmu | ENSMUSG00000054252  | Fgfr3      | chr5:34073930-34074080     | 151 | MmuEX0019169 | ESRP_DEP-ENH | AS       |
| CL012712.01 | Mmu | ENSMUSG00000054252  | Fgfr3      | chr5:34074766-34074910     | 145 | MmuEX0019170 | ESRP_DEP-SIL | AS       |
| CL012712.01 | Mmu | ENSMUSG00000031565  | Fgfr1      | chr8:26673846-26673996     | 151 | NA           | ESRP_DEP-ENH | AS       |
| CL012712.01 | Mmu | ENSMUSG00000031565  | Fgfr1      | chr8:26674812-26674956     | 145 | NA           | ESRP_DEP-SIL | HIGH_PSI |
| CL012712.01 | Spu | WHL22.323968        | Fgfr=FGFR1 | Scaffold2483:151430-151571 | 142 | SpuEX0011658 | NR           | HIGH_PSI |
| CL012712.02 | Dre | ENSDARG00000058115  | fgfr2      | chr13:46250743-46251009    | 267 | DreEX0032685 | ESRP_DEP-SIL | AS       |
| CL012712.02 | Hsa | ENSG00000066468     | FGFR2      | chr10:123324952-123325218  | 267 | HsaEX0025680 | ESRP_DEP-SIL | AS       |
| CL012712.02 | Mmu | ENSMUSG00000030849  | Fgfr2      | chr7:137385892-137386158   | 267 | MmuEX0019154 | ESRP_DEP-SIL | AS       |
| CL011475.01 | Dre | ENSDARG00000061525  | slka       | chr13:24666762-24666854    | 93  | NA           | ESRP_DEP-ENH | AS       |
| CL011475.01 | Hsa | ENSG00000065613     | SLK        | chr10:105770574-105770666  | 93  | HsaEX0060174 | ESRP_DEP-ENH | AS       |
| CL011475.01 | Mmu | ENSMUSG00000025060  | Slk        | chr19:47702138-47702230    | 93  | MmuEX0043706 | ESRP_DEP-ENH | AS       |

|             |     |                    |                |                           |     |              |              |    |
|-------------|-----|--------------------|----------------|---------------------------|-----|--------------|--------------|----|
| CL002719.01 | Dre | ENSDARG00000069946 | itga6b         | chr1:30258429-30258522    | 94  | DreEX0040093 | ESRP_DEP-ENH | AS |
| CL002719.01 | Dre | ENSDARG00000042282 | itga6a         | chr9:3511546-3511644      | 99  | NA           | NC           | NI |
| CL002719.01 | Hsa | ENSG00000091409    | ITGA6          | chr2:173366500-173366629  | 130 | HsaEX0032370 | ESRP_DEP-ENH | AS |
| CL002719.01 | Mmu | ENSMUSG00000027111 | Itga6          | chr2:71691591-71691720    | 130 | MmuEX0024617 | ESRP_DEP-ENH | AS |
| CL003118.01 | Dre | ENSDARG00000103125 | TSC2           | chr1:53549954-53550082    | 129 | DreEX0009092 | ESRP_DEP-ENH | AS |
| CL003118.01 | Hsa | ENSG00000103197    | TSC2           | chr16:2127599-2127727     | 129 | HsaEX0067508 | ESRP_DEP-ENH | AS |
| CL003118.01 | Mmu | ENSMUSG00000002496 | Tsc2           | chr17:24743169-24743297   | 129 | MmuEX0049266 | ESRP_DEP-ENH | AS |
| CL000259.01 | Dre | ENSDARG00000020469 | map3k7         | chr20:24266265-24266345   | 81  | DreEX0044679 | ESRP_DEP-ENH | AS |
| CL000259.01 | Hsa | ENSG00000135341    | MAP3K7         | chr6:91254271-91254351    | 81  | HsaEX0037602 | ESRP_DEP-ENH | AS |
| CL000259.01 | Mmu | ENSMUSG00000028284 | Map3k7         | chr4:32081849-32081929    | 81  | MmuEX0027748 | ESRP_DEP-ENH | AS |
| CL009534.02 | Dre | ENSDARG00000005754 | ptprfb         | chr2:18006258-18006284    | 27  | DreEX0059640 | ESRP_DEP-ENH | AS |
| CL009534.02 | Dre | ENSDARG00000104937 | CABZ01084323.1 | KN150000.1:26209-26235    | 27  | NA           | NC           | NI |
| CL009534.02 | Hsa | ENSG00000142949    | PTPRF          | chr1:44067742-44067768    | 27  | HsaEX0051138 | ESRP_DEP-ENH | AS |
| CL009534.02 | Mmu | ENSMUSG00000033295 | Ptpnf          | chr4:117900424-117900450  | 27  | MmuEX0037910 | ESRP_DEP-ENH | AS |
| CL013859.01 | Dre | ENSDARG00000104279 | appa           | chr1:638055-638222        | 168 | DreEX0013999 | ESRP_DEP-ENH | AS |
| CL013859.01 | Hsa | ENSG00000084234    | APLP2          | chr11:129993507-129993674 | 168 | HsaEX0005149 | ESRP_DEP-ENH | AS |
| CL013859.01 | Mmu | ENSMUSG00000031996 | Aplp2          | chr9:30975146-30975313    | 168 | MmuEX0005570 | ESRP_DEP-ENH | AS |
| CL003579.01 | Dre | ENSDARG00000027279 | numb           | chr17:51739829-51739981   | 153 | DreEX0052085 | ESRP_DEP-ENH | AS |
| CL003579.01 | Hsa | ENSG00000133961    | NUMB           | chr14:73745989-73746132   | 144 | HsaEX0044216 | ESRP_DEP-ENH | AS |
| CL003579.01 | Mmu | ENSMUSG00000021224 | Numb           | chr12:85138147-85138293   | 147 | MmuEX0032646 | ESRP_DEP-ENH | AS |
| CL010697.01 | Dre | ENSDARG00000019581 | uso1           | chr1:25797430-25797450    | 21  | DreEX0083646 | ESRP_DEP-ENH | AS |
| CL010697.01 | Hsa | ENSG00000138768    | USO1           | chr4:76716489-76716509    | 21  | HsaEX0069561 | ESRP_DEP-ENH | AS |
| CL010697.01 | Mmu | ENSMUSG00000029407 | Uso1           | chr5:92612508-92612528    | 21  | MmuEX0050799 | ESRP_DEP-ENH | AS |
| CL001791.04 | Dre | ENSDARG00000098374 | FLNB (2 of 2)  | chr11:41969117-41969200   | 84  | DreEX0004329 | ESRP_DEP-ENH | AS |
| CL001791.04 | Hsa | ENSG00000136068    | FLNB           | chr3:58127585-58127656    | 72  | HsaEX0025930 | ESRP_DEP-ENH | AS |

|             |     |                    |           |                          |     |              |              |    |
|-------------|-----|--------------------|-----------|--------------------------|-----|--------------|--------------|----|
| CL001791.04 | Mmu | ENSMUSG00000025278 | Flnb      | chr14:8755189-8755260    | 72  | NA           | ESRP_DEP-ENH | AS |
| CL014228.02 | Dre | ENSDARG00000019345 | mark3a    | chr13:15527303-15527329  | 27  | DreEX0045082 | NR           | AS |
| CL014228.02 | Dre | ENSDARG00000026630 | mark3b    | chr20:43906181-43906207  | 27  | DreEX0045098 | NR           | AS |
| CL014228.02 | Dre | ENSDARG00000079905 | mark2a    | chr21:27174765-27174791  | 27  | DreEX0045060 | ESRP_DEP-ENH | AS |
| CL014228.02 | Hsa | ENSG00000072518    | MARK2     | chr11:63673560-63673586  | 27  | HsaEX0037916 | ESRP_DEP-ENH | AS |
| CL014228.02 | Mmu | ENSMUSG00000024969 | Mark2     | chr19:7354476-7354502    | 27  | MmuEX0027951 | ESRP_DEP-ENH | AS |
| CL002302.01 | Dre | ENSDARG00000052170 | uap1      | chr6:35056027-35056068   | 42  | DreEX0082619 | ESRP_DEP-ENH | AS |
| CL002302.01 | Hsa | ENSG00000117143    | UAP1      | chr1:162562522-162562572 | 51  | HsaEX0068590 | ESRP_DEP-ENH | AS |
| CL002302.01 | Mmu | ENSMUSG00000026670 | Uap1      | chr1:172078127-172078177 | 51  | MmuEX0050061 | ESRP_DEP-ENH | AS |
| CL002302.01 | Spu | WHL22.63642        | Udp1=UAP1 | Scaffold1209:59560-59595 | 36  | SpuEX0043794 | NR           | AS |
| CL010989.01 | Dre | ENSDARG00000027867 | paplna    | chr17:51080927-51080998  | 72  | DreEX0053392 | ESRP_DEP-ENH | AS |
| CL010989.01 | Hsa | ENSG00000100767    | PAPLN     | chr14:73719869-73719934  | 66  | HsaEX0045433 | ESRP_DEP-ENH | AS |
| CL010989.01 | Mmu | ENSMUSG00000021223 | Papln     | chr12:85116799-85116864  | 66  | MmuEX0033595 | ESRP_DEP-ENH | AS |
| CL015350.02 | Dre | ENSDARG00000032114 | slain2    | chr20:23551888-23551968  | 81  | DreEX0071877 | ESRP_DEP-ENH | AS |
| CL015350.02 | Hsa | ENSG00000109171    | SLAIN2    | chr4:48396593-48396670   | 78  | HsaEX0058524 | ESRP_DEP-ENH | AS |
| CL015350.02 | Mmu | ENSMUSG00000036087 | Slain2    | chr5:73357043-73357120   | 78  | MmuEX0042523 | ESRP_DEP-ENH | AS |
| CL010608.03 | Dre | ENSDARG00000078441 | ppip5k2   | chr10:6857946-6858119    | 174 | DreEX0057483 | ESRP_DEP-ENH | AS |
| CL010608.03 | Hsa | ENSG00000145725    | HISPPD1   | chr5:102518935-102519108 | 174 | HsaEX0030034 | ESRP_DEP-ENH | AS |
| CL010608.03 | Mmu | ENSMUSG00000040648 | Ppip5k2   | chr1:99617683-99617856   | 174 | MmuEX0036612 | ESRP_DEP-ENH | AS |

**Supplementary Table 2.** This table contains all primer sequences used in this study.

|                            |                              |
|----------------------------|------------------------------|
| DreESRP1_probe_Fw          | GTCACCTGGATTTGATCTCT         |
| DreESRP1_probe_Rv          | ATCTGATTCTCCCTTGACAG         |
| DreESRP2_probe_Fw          | GATTGCAGGAGGCACTTCCA         |
| DreESRP2_probe_Rv          | AGCTCATATTCATGTTTCATG        |
| Dre_exon1_gESRP1_Fw        | TAGGAGCAAGTGGGGATAAGTT       |
| Dre_exon1_gESRP1_Rv        | AAACAACCTTATCCCCACTTGC       |
| DreEsrp1_genotype_Fw       | GTCACCTGGATTTGATCTCT         |
| DreEsrp1_genotype_Rv       | TCAAATTGATATGTGTAGCC         |
| Dre_exon3_gESRP2_Fw        | TAGGAGACCGGGCTCACTGCCG       |
| Dre_exon3_gESRP2_Rv        | AAACCGGCAGTGAGCCCGGTCT       |
| DreESRP2_genotype_Fw       | GCAAACCTTCACCGGACTCTA        |
| DreESRP2_genotype_Rv       | CTTCCCTCCCTCACTCACTC         |
| DreESRP1_ORF_ATG_Fw        | ATGACGGTTAATCCCGACTA         |
| DreESRP1_ORF_STOP_Rv       | TTATGAAAGAATATCATTAG         |
| DreESRP2_ORF_ATG_Fw        | ATGGCTTCGCACAGTGATAC         |
| DreESRP2_ORF_ATG_Rv        | CTACAGACAAAGCCACTCTT         |
| DreEsrp1_qPCR_Fw           | GGCACTGCAGAGACACAAGC         |
| DreEsrp1_qPCR_Rv           | CGCATGCGGACGATAATCTG         |
| DreEsrp2_qPCR_Fw           | GTGAAGGACATGGTTCTGC          |
| DreEsrp2_qPCR_Rv           | CACGAGCTCTGATGACCGTC         |
| HsaARHGAP17_AS_Fw          | TTGTACCTCTCACCACCCCG         |
| HsaARHGAP17_AS_Rv          | GCAGTGTATGCGGGCTGG           |
| HsaExoc7_AS_Fw1            | TACCAGATACGCTCCAGCCAG        |
| HsaExoc7_AS_Rv1            | CCACGTCCAGCATGTCATCTC        |
| HsaFGFR1_C1_Fw1            | CATCCTGCAAGCAGGGTTGC         |
| HsaFGFR1_IIIb_Rv1          | CAGTGAGCCACGCAGACTGG         |
| HsaFGFR1_IIIc_Rv1          | TCGGTGGTATTAACTCCAGC         |
| CroESRP_probe_Fw           | GCTGCTGAATTGCGTTGTTG         |
| CroESRP_probe_Rv           | TTCAGCTCGCATCGTGCTCG         |
| CroTwist-like1_promoter_Fw | ACCACAGCTTCTATTATATATTAACCTC |
| CroTwist-like1_promoter_Rv | TATCGTGTGTTGATTGATTTGAAAG    |
| CroTwist-like2_probe_Fw    | ATGCCAAAATCACCAGTCAAG        |
| CroTwist-like2_probe_Rv    | CCACACATTAAGTTTCTGGC         |
| CroESRP_transORF_Fw        | ATGACGAGCCCAATCATACCCAC      |
| CroESRP_transORF_Rv        | TTAAATAAGCAGCAGTTTCGATGTACC  |
| BlaESRP_probe_Fw           | CGAGGACTCAACATCACCAA         |
| BlaESRP_probe_Rv           | GCCGTTCTTGTTCAGCTGAC         |

|                            |                             |
|----------------------------|-----------------------------|
| SpuEsrp_probe_Fw           | GCAGGCCTCGGTCACCATCA        |
| SpuEsrp_probe_Fw           | GCAAAGCACGTGATGCTCCA        |
| SpuEsrp_intron2ret_mRNA_Fw | ACTCAGCATAAGACCTGATG        |
| SpuEsrp_intron2ret_gDNA_Fw | TGGCATGGACTCACTTAAC         |
| SpuEsrp_intron2ret_mRNA_Rv | TTCACTGCCGTATCGTCTGG        |
| DreMeis1b_AS_Fw            | AGCAGCACATGGGAATCAGAC       |
| DreMeis1b_AS_Rv            | AGGGATGTATGAACGCATGGG       |
| DrePtrprfb_AS_Fw           | TAATGGATGTTCGCTCTGCCAG      |
| DrePtrprfb_AS_Rv           | CGAGCTCCATCACCTTTGGTT       |
| DreSnap23.1_AS_Fw          | CGAAGGAATGTAGGAAAGAGTTTGGGA |
| DreSnap23.1_AS_Rv          | CTCATCTGTAACCTTGGTTGGCTCT   |
| DreUso1_AS_Fw              | GTACAGTTGGCCACCAGTCTG       |
| DreUso1_AS_Rv              | GCAGAGCAACATGAGGAGACC       |
| DreSpast_AS_Fw             | GATCACCAACCTGTCCATGGC       |
| DreSpast_AS_Rv             | GAGGGAGTGCAGTTCAGACCT       |
| DreMark2b_AS_Fw            | ACTCTAGGAGTGCAAAACGGC       |
| DreMark2b_AS_Rv            | TCTTCGTTGTTGGCTGTTCCC       |
| DreSept7_AS_Fw             | GGCATCGACAACAACAAAGCC       |
| DreSept7_AS_Rv             | CCTGCTCCATCTCCATCTCCA       |
| DreFlna_AS_Fw              | GTACCGTGTGCACACCTGATG       |
| DreFlna_AS_Rv              | ACCCAATTGCCCATCTGTAGC       |
| DreLSP1_AS_Fw              | GGAGGGATGTGATGGAGAAGC       |
| DreLSP1_AS_Rv              | GCGGTTTAAAGACTCGGTCCT       |
| DreMagi1b_AS_Fw            | GAGAGCACCAAGGGCATGAAG       |
| DreMagi1b_AS_Rv            | AGGAGCTGAGTTCACCTCCGA       |
| DreSfswap_AS_Fw            | GTCTCAGTCTCGGTCCCCC         |
| DreSfswap_AS_Rv            | CTGAGTGATTTTGCTTTGTAAGTGA   |
| DreARHGAP12a_AS_Fw         | ACACCTCTGATGCCAGGAGAT       |
| DreARHGAP12a_AS_Rv         | CGGACTTCTTTCCATGTTTCAGTG    |
| DreVaspb_AS_Fw             | AGAAGACCATGGGAAAAATCCGC     |
| DreVaspb_AS_Rv             | CTGTTTAATTCGTTCCATCTCTGACT  |
| DreTnc_AS_Fw               | CCTGGGATCTGGACAGAGGAG       |
| DreTnc_AS_Rv               | ACGGGTATGTGGCATAGTCCA       |
| DreCol4a3bpa_AS_Fw         | TCCCAGGTGGAAAGGAGCAG        |
| DreCol4a3bpa_AS_Rv         | ACAACCAGTTGCCAGTTAGCA       |
| SpuExoc7_AS_Fw             | GGATCTAACGTCTCGGAGAC        |
| SpuExoc7_AS_Rv             | CTAGAGCCTTGGAACCTGTT        |
| SpuFam40_AS_Fw             | GGTGTATTCAGTGAATGTTC        |
| SpuFam40_AS_Rv             | CTGCAGAACTTAGTCACCAT        |

|                    |                       |
|--------------------|-----------------------|
| SpuMyo5_AS_Fw      | CATGCGGACATATCTACTGG  |
| SpuMyo5_AS_Rv      | CTACCAGATTAGCCTTGTC   |
| SpuDdc_AS_Fw       | AGCAAGTGAATCAACTCTAG  |
| SpuDdc_AS_Rv       | GGACCCAGCTCCTTGAGATT  |
| SpuCbl_AS_Fw       | CAAGGTCCTCGGTCCAGTAC  |
| SpuCbl_AS_Rv       | GTTGATGGACATGATGTGAG  |
| SpuIft88_AS_Fw     | AATCTAGAGCAAGATGAGAC  |
| SpuIft88_AS_Rv     | CTGCCGCTGTTCCCATGATG  |
| SpuC8orf34_AS_Fw   | CTGAGAAAGGACCCACTGTC  |
| SpuC8orf34_AS_Rv   | TCAACTGAGCCTGTTTCATAC |
| SpuFam96a_AS_Fw    | TAGGTCTTTGTCTGAGAGTC  |
| SpuFam96a_AS_Rv    | TCTATGCTGACACAATGTTC  |
| SpuLym7_AS_Fw      | GGTGCTGTCTCTGTATAAGT  |
| SpuLym7_AS_Rv      | GTGAATGCCTTGAGCTACAG  |
| SpuKIAA0427_AS_Fw  | ACCTGCTACCTGTGCTGCCT  |
| SpuKIAA0427_AS_Rv  | CATCCGCTTGCTCTAAGCTC  |
| SpuNup54_AS_Fw     | GGTGCCAAGCCAGGAGGTTC  |
| SpuNup54_AS_Rv     | CTCATCGCCATAGATGCTGG  |
| SpuSlain2_AS_Fw    | CTCGTAGCTCAAGCGTTAGC  |
| SpuSlain2_AS_Rv    | CTGAGTCTGTTGACAGCGTT  |
| DreFGFR1a_C1_Fw    | GCCTGCAAACCGTACCGCAG  |
| DreFGFR1a_IIIb_Rv  | TGTGTGTCCGAGCTGTTGAC  |
| DreFGFR1a_IIIc_Rv  | ATAGACAGTCAACCATGCAG  |
| DreFGFR1b_C1_Fw    | CAGACCCATCCTGTACGCTG  |
| DreFGFR1b_IIIb_Rv  | GGTGTCCGAGCTATTGACGC  |
| DreFGFR1b_IIIc_Rv  | TAACAACGGTCAGCCATGCT  |
| DreFGFR2_C1_Fw     | CTCCTCACCGGCCCATTC    |
| DreFGFR2_IIIb_Rv   | CGAGCTGTTTATGCCCGAGC  |
| DreFGFR2_IIIc_Rv   | ACCGTCAACCAAGCAGTGTG  |
| DreFGFR3_C1_Fw     | TCACCGGCCCATCTTACAGG  |
| DreFGFR3_IIIb_Rv   | GTCAGCGTATCTTGGGCCTC  |
| DreFGFR3_IIIc_Rv   | TAAGCCAAGCAGAGTGATGG  |
| BlaFGFR_C1_AS_Fw   | GTGGACTTCCAGTGTAAGGT  |
| BlaFGFR_IIIb_AS_Rv | AGCACTCTGATTGACGCTTC  |
| BlaFGFR_IIIc_AS_Rv | TGTGTTATTCACATCCGCTG  |
| BlaFGFR_C2_AS_Rv   | GTAAGGGTTTCTTCAGCTGG  |
| BlaESRPexp_Fw      | CAGCGAACTTTCCGACGAGG  |
| BlaESRPexp_Rv      | CGCTGTCCCTGAGGAACGCT  |
| BlaGAPDH_exp_Fw    | CCGATGTTTCGTATGGGTGT  |



|                     |                           |
|---------------------|---------------------------|
| BlaGAPDH_exp_Rv     | ATCGTTGATGACCTTGGCCAG     |
| BlaFGFR_Mg_Fw       | GCGGAAGTACCTCATTGATA      |
| BlaFGFR_Mg_Rv       | TAGTGATGAGGACAGTCTTG      |
| BlaFGFR_Mg-ΔIIIx_Fw | GTGGTGACAATGCATTGAGA      |
| BlaFGFR_Mg-ΔIIIx_Rv | ACCACACAAATCTGCGAACC      |
| BlaESRP_ORF_Fw      | CGCATCTCGAACTGGTTCGC      |
| BlaESRP_ORF_Rv      | TATGGTCTGACATCAATGGC      |
| HsaSLK_AS_Fw        | GCTTGCGAGATGAAGCCAAAC     |
| HsaSLK_AS_Rv        | GCTAACTCTGCCTTCTGCTGC     |
| HsaOSBPL3_AS_Fw     | AAATGAGCCAGCTCCTGCAAA     |
| HsaOSBPL3_AS_Rv     | TGAGGTTTCAGAGCCATCAGA     |
| HsaFLNB_AS_Fw       | GGCGAAGAAGTAGGCTTTGTGG    |
| HsaFLNB_AS_Rv       | GCCGTTTCATGTCACTCACTGG    |
| HsaMAGI1_AS_Fw      | TCTTGTTAGACCCTCGGTGC      |
| HsaMAGI1_AS_Rv      | AGATACCATAGACAGGGTCTTCA   |
| HsaRALGPS2_AS_Fw    | GTAGCAGCGATGGTTCTGAACT    |
| HsaRALGPS2_AS_Rv    | GCTTTTTGCCTTCTTTTAACAAAGT |
| HsaSCRIB_AS_Fw      | AGCACTGAGGAGGAGGACAAG     |
| HsaSCRIB_AS_Rv      | CCTTATAGGGTGTGGAGCCC      |

**Supplementary Table 3.** This table contains statistics for sea urchin, zebrafish, mouse and human RNA-seq data.

| Sample ID                 | Species                              | Length | Reads       | %mRNA  | %mRNA_m | %gDNA  | %gDNA_m | Accession  | Source         |
|---------------------------|--------------------------------------|--------|-------------|--------|---------|--------|---------|------------|----------------|
| Embr_5dpf_ESRP_WT_a       | <i>Danio rerio</i>                   | 125PE  | 155,379,946 | 77.95% | 9.11%   | 60.15% | 10.25%  | NA         | This study     |
| Embr_5dpf_ESRP_WT_b       | <i>Danio rerio</i>                   | 125PE  | 139,723,611 | 77.35% | 9.11%   | 59.33% | 10.08%  | NA         | This study     |
| Embr_5dpf_ESRP_DKO_a      | <i>Danio rerio</i>                   | 125PE  | 147,085,624 | 80.15% | 6.17%   | 60.06% | 8.55%   | NA         | This study     |
| Embr_5dpf_ESRP_DKO_b      | <i>Danio rerio</i>                   | 125PE  | 140,076,135 | 81.20% | 6.41%   | 62.44% | 8.30%   | NA         | This study     |
| Embr_24h_Esrp_Cont_e      | <i>Strongylocentrotus purpuratus</i> | 125PE  | 77,394,331  | 27.84% | 2.05%   | 47.96% | 15.26%  | NA         | This study     |
| Embr_24h_Esrp_Cont_f      | <i>Strongylocentrotus purpuratus</i> | 125PE  | 72,923,440  | 29.05% | 2.93%   | 49.40% | 15.89%  | NA         | This study     |
| Embr_24h_Esrp_KD_e        | <i>Strongylocentrotus purpuratus</i> | 125PE  | 82,623,468  | 25.97% | 2.20%   | 44.53% | 15.65%  | NA         | This study     |
| Embr_24h_Esrp_KD_f        | <i>Strongylocentrotus purpuratus</i> | 125PE  | 87,361,488  | 25.42% | 2.69%   | 47.00% | 16.15%  | NA         | This study     |
| E18_Epidermis_Cont_a      | <i>Mus musculus</i>                  | 100PE  | 45,927,980  | 74.32% | 8.00%   | 61.02% | 25.42%  | SRR1725983 | PMID: 26371508 |
| E18_Epidermis_Cont_b      | <i>Mus musculus</i>                  | 100PE  | 83,095,958  | 79.59% | 8.19%   | 62.15% | 23.74%  | SRR1725984 | PMID: 26371508 |
| E18_Epidermis_Esrp12_KO_a | <i>Mus musculus</i>                  | 100PE  | 39,300,846  | 69.61% | 9.50%   | 56.81% | 31.60%  | SRR1725976 | PMID: 26371508 |
| E18_Epidermis_Esrp12_KO_b | <i>Mus musculus</i>                  | 100PE  | 54,796,272  | 74.57% | 8.92%   | 59.65% | 28.11%  | SRR1725977 | PMID: 26371508 |
| CL_H358_ESRP_Cont_a       | <i>Homo sapiens</i>                  | 101PE  | 41,442,942  | 74.41% | 4.07%   | 61.55% | 21.32%  | SRR2966415 | PMID:27044866  |
| CL_H358_ESRP_Cont_b       | <i>Homo sapiens</i>                  | 101PE  | 67,887,074  | 74.07% | 4.05%   | 61.36% | 21.32%  | SRR2966416 | PMID:27044866  |
| CL_H358_ESRP_Cont_c       | <i>Homo sapiens</i>                  | 101PE  | 67,933,853  | 74.24% | 4.09%   | 61.29% | 21.47%  | SRR2966417 | PMID:27044866  |
| CL_H358_ESRP_KD_a         | <i>Homo sapiens</i>                  | 101PE  | 40,653,351  | 74.82% | 4.13%   | 61.08% | 21.97%  | SRR2966412 | PMID:27044866  |
| CL_H358_ESRP_KD_b         | <i>Homo sapiens</i>                  | 101PE  | 57,451,860  | 74.83% | 4.12%   | 61.19% | 22.07%  | SRR2966413 | PMID:27044866  |
| CL_H358_ESRP_KD_c         | <i>Homo sapiens</i>                  | 101PE  | 51,094,649  | 74.07% | 4.06%   | 61.92% | 21.77%  | SRR2966414 | PMID:27044866  |
| CL_PNT2_ESRP_KD           | <i>Homo sapiens</i>                  | 76SE   | 74,468,344  | 70.33% | 3.27%   | 41.28% | 15.75%  | SRR436883  | PMID:22354987  |
| CL_PNT2_ESRP_Cont         | <i>Homo sapiens</i>                  | 76SE   | 59,124,618  | 70.70% | 3.34%   | 43.98% | 15.34%  | SRR436884  | PMID:22354987  |
| CL_MB231_ESRP_Cont        | <i>Homo sapiens</i>                  | 76SE   | 136,249,697 | 72.32% | 3.92%   | 37.76% | 16.48%  | SRR436885  | PMID:22354987  |
| CL_MB231_ESRP_OV          | <i>Homo sapiens</i>                  | 76SE   | 120,901,583 | 74.63% | 4.61%   | 45.73% | 19.49%  | SRR436886  | PMID:22354987  |



|                                                                                                                                                                                                                                                                                                                                                                                                                                                                                                                                                                                                                        |
|------------------------------------------------------------------------------------------------------------------------------------------------------------------------------------------------------------------------------------------------------------------------------------------------------------------------------------------------------------------------------------------------------------------------------------------------------------------------------------------------------------------------------------------------------------------------------------------------------------------------|
| EWGSRVGLPECHRIVAVLKELLKRGATLSRPQTVQAAAQGT<br>LTDAACAVRLRNVAWKAGVADIKAFFCGLDIVQGGVALSFD<br>QMGRPSGEAVVMFTSSDMAALACDRSHQILTDRVVEVNPV<br>EEDLGILRGGRSSHVVRLRGLPYSATRDNIKDFSPISLEADSI<br>VIAQNASGQPSGEAFVEFTSEGDVASAMRCNGQHMGSRFIE<br>LFTSSPEERARATRFQERRSEPRPAQPSRPAEGHVMLRSLPW<br>TVREAIIIAFFKGLDVLDPGVQLLMLPDGRPSGGAIVAFGTA<br>ADAESALLLSKSRGTRVIEIVPCEAPPPPLAGPSGSGYAEAP<br>RDPYSYRDRYERSAYDDPYAYGRGYDGPSRGYSRYPPQHYP<br>SSRGGPYASSYARGASSYAPDDYYAADYGQAGYEAAGSA<br>DTAYASGGYSDTQASYTGGYEGYSSAYARQSSYAGEYGSQY<br>DPAAYPRSSAPRGAYAPPASGATLRMRGLPFSAGAEDVLAFF<br>SDYRVVPDSLSGPSNGQAIISFETPEEAQRAMQERQRQYMG<br>TRFIELFAA* |
|------------------------------------------------------------------------------------------------------------------------------------------------------------------------------------------------------------------------------------------------------------------------------------------------------------------------------------------------------------------------------------------------------------------------------------------------------------------------------------------------------------------------------------------------------------------------------------------------------------------------|

*Tetrahymena thermophila*

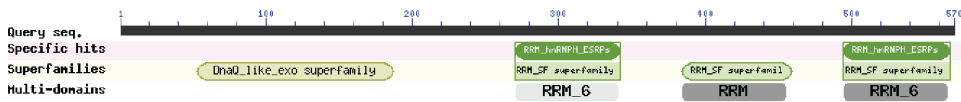

*Galdieria sulphuraria*

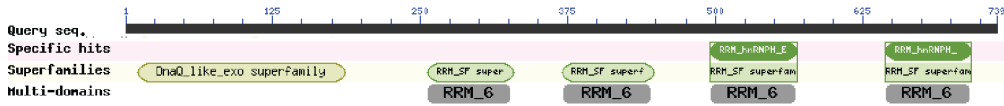

*Acanthamoeba castellanii*

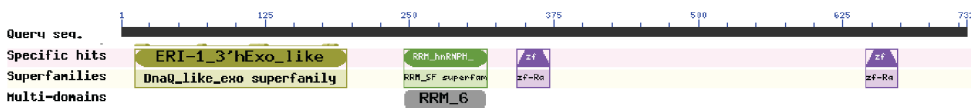

*Spizellomyces punctatus*

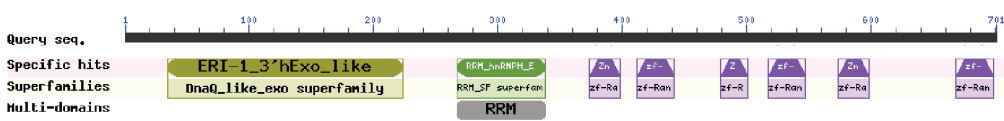

*Mylnosiga fluctuans*

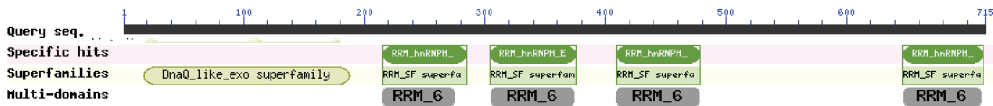

*Petrosia ficiformes*

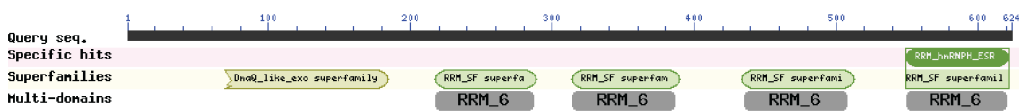

*Priapulus caudatus*

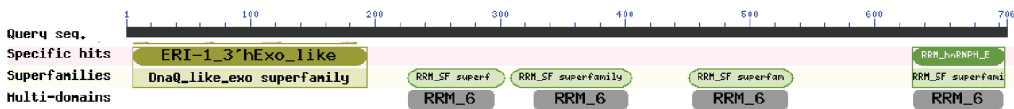

*Callorhinchus milii* ESRP1

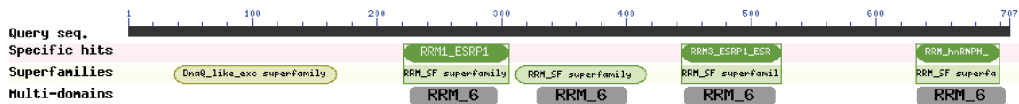

*Homo sapiens* ESRP1

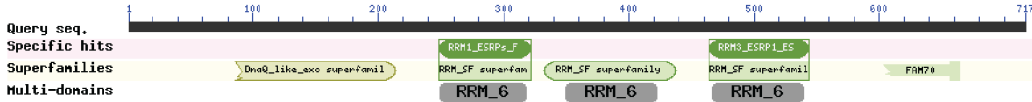

*Falco cherrug* ESRP2

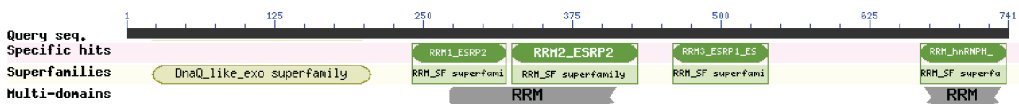

*Homo sapiens* ESRP2

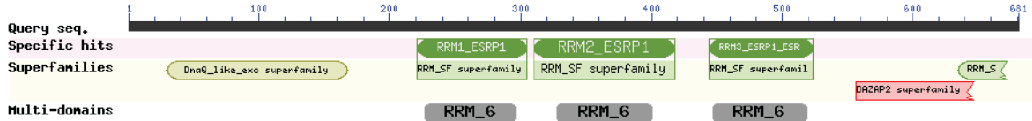

**Supplementary Figure 1 | Protein domain composition of *Esrp* homologous genes in eukaryotic species.**

All represented eukaryotes share a DnaQ-like exonuclease domain in their *Esrp* homologous genes. Variation arises from the number of RRM6 domains, a specific type of RNA-binding domain. The alveolata species *Tetrahymena thermophila*, and the rodhophyte *Galdieria sulphuraria* have three and four RRM6 domains, respectively. In the amebozoan *Acanthamoeba castellanii* and the fungi *Spizellomyces punctatus*, more closely related to metazoans, only one RRM6 domain was found. Zinc finger domains were also detected in those species. Four RRM6 domains were found in orthologs from choanoflagellate and metazoan species. However, partial or no detection of a fourth RRM6 domain was observed in some species, especially in *Esrp1* genes from vertebrates. Partial DAZAP2 and FAM70 domains were also detected in human genes, but with low e-values. Other species in the figure are the choanoflagellate *Mylnosiga fluctuans*, the demosponge *Petrosia ficiformis*, the priapulid *Priapulid caudatus*, the chondrichthyan *Callorhincus milii*, the dinosaur *Falco cherrug* and the mammal *Homo sapiens*.

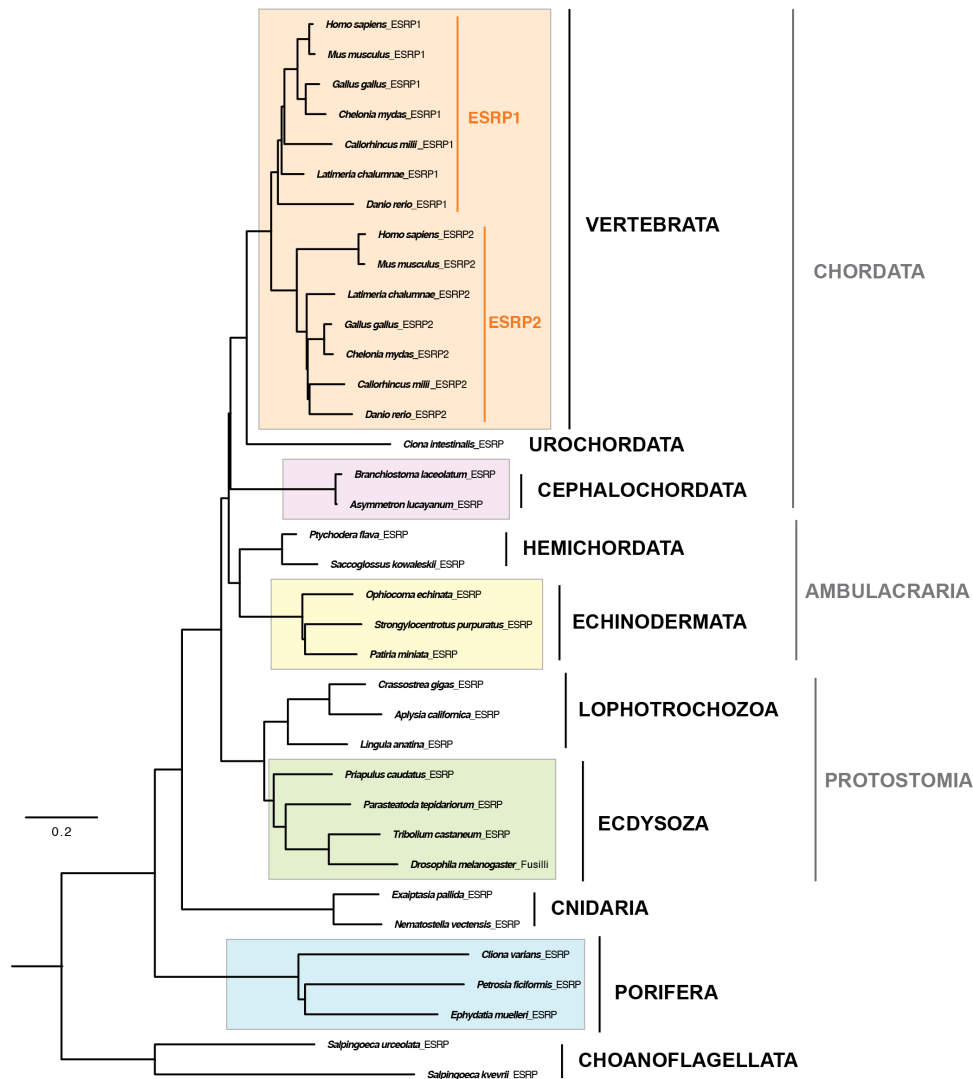

**Supplementary Figure 2 | Phylogenetic analysis reveals a lineage-specific duplication of *Esrp* genes in vertebrates.**

Most species shown in the tree belong to metazoan lineages, with the exception of choanoflagelates *Salpingoeca urceolata* and *Salpingoeca qvevrii*. Vertebrates: *Homo sapiens* (Hsa), *Mus musculus* (Mmu), *Gallus Gallus* (Gga), *Chelonia mydas* (Cmy), *Callorhincus milii* (Cmi), *Latimeria chalumnae* (Lch) and *Danio rerio* (Dre). Urochordates: *Ciona intestinalis* (Cin). Cephalochordates: *Branchiostoma lanceolatum* (Bla) and *Asymmetron lucayanum* (Alu). Hemichordates: *Ptycodera flava* (Pfl) and *Saccoglossus kowalevskii* (Sko). Echinoderms: *Ophiocoma echinata* (Oec), *Strongylocentrotus purpuratus* (Spu) and *Patiria miniata* (Pmi). Lophotrochozoans: *Crassostrea gigas* (Cgi), *Aplysia californica* (Aca) and *Lingula anatina* (Lan). Ecdysozoans: *Priapulius caudatus* (Pca), *Parasteatoda tepidariorum* (Pte), *Tribolium castaneum* (Tca) and *Drosophila melanogaster* (Dre). Cnidarians: *Exaiptasia pallida* (Epa) and *Nematostella vectensis* (Nve). Sponges: *Cliona varians* (Cva), *Petrosia ficiformis* (Pfi) and *Ephydatia muelleri* (Emu).

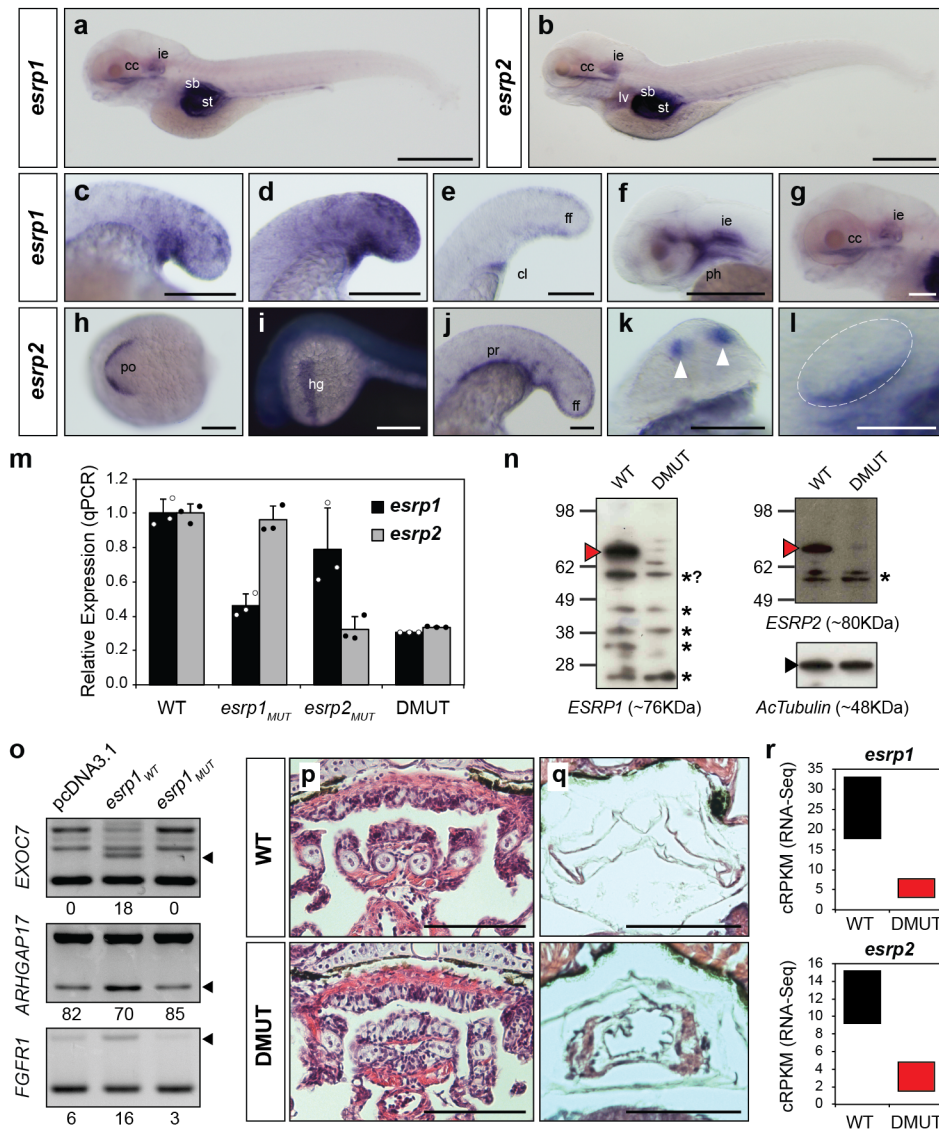

### Supplementary Figure 3 | Developmental expression and impact of *Esrp* genes in zebrafish.

(a-l) Additional details of WMISH for *esrp1* and *esrp2* in zebrafish embryos. (a,b) Similar expression of *esrp1* and *esrp2* was detected in 5dpf embryos in inner ear (ie) and craniofacial cartilaginous (cc) tissue. Signal was also observed in stomach (st) and swim bladder (sb), although non-specific staining of those hollow organs by NBT/BCIP precipitation could not be ruled out. *esrp2* was additionally found in the liver (lv). (c-e) Broad expression of *esrp1* in the tail bud ectoderm was maintained at 18hpf (c), reached its highest intensity by 20hpf (d), and became restricted to the median fin fold (ff) by 24hpf (e), when it was also observed in cloaca (cl) tissue. (f) 48hpf embryo heads showed expression of *esrp1* predominantly in pharynx (ph) and inner ear (ie). (g) Detail of *esrp1* expression in the head of 5dpf embryos in craniofacial cartilage (cc) and inner ear (ie). (h-l) *esrp2* expression was also detected in a few territories where *esrp1* was not observed, including the polster (po) at 14hpf (h), that later develops into the hatching gland (hg) by 24hpf (i), and in the pronephros (pr) (j); it shared expression with *esrp1* in structures such as olfactory placode (white arrowheads) (k, 24hpf) and inner



ear ventral epithelium (l, 32hpf). **(m)** Quantitative PCR (qPCR) assays showing the levels of expression of *esrp1* and *esrp2* genes in pools of 5dpf embryos with different genotypes (wild type [WT], *esrp1* and *esrp2* single mutants and double mutants [DMUT]). Error bars correspond to standard deviations of three technical replicates. **(n)** Western blot assays showing detection of ESRP1 and ESRP2 full-length proteins (red arrow heads) in 5dpf in WT, but not DMUT, embryos. Asterisks mark shorter bands that most likely correspond to unspecific signal based on size. **(o)** Ectopic expression of WT, but not mutant, zebrafish *esrp1* transcripts in human 293T cells produced splicing changes in endogenous *ESRP1* human targets. Black arrowheads indicate *Esrp*-enhanced isoforms. **(p,q)** Phenotypic comparison of transversal sections stained with hematoxylin and eosin from 6dpf embryos shows impaired development of visceral skeleton **(p)** and swim bladder **(q)**. **(r)** Expression of *esrp1* and *esrp2* in 5dpf embryos quantified by RNA-seq using the cRPKM metric shows a clear reduction in the steady-state mRNA levels of both genes in DMUT embryos. Boxes represent the range of expression in the two replicates. Scale bars: 2 mm (a, b, i), 500  $\mu\text{m}$  (d-h, j, k), 250  $\mu\text{m}$  (l), 100  $\mu\text{m}$  (p,q).

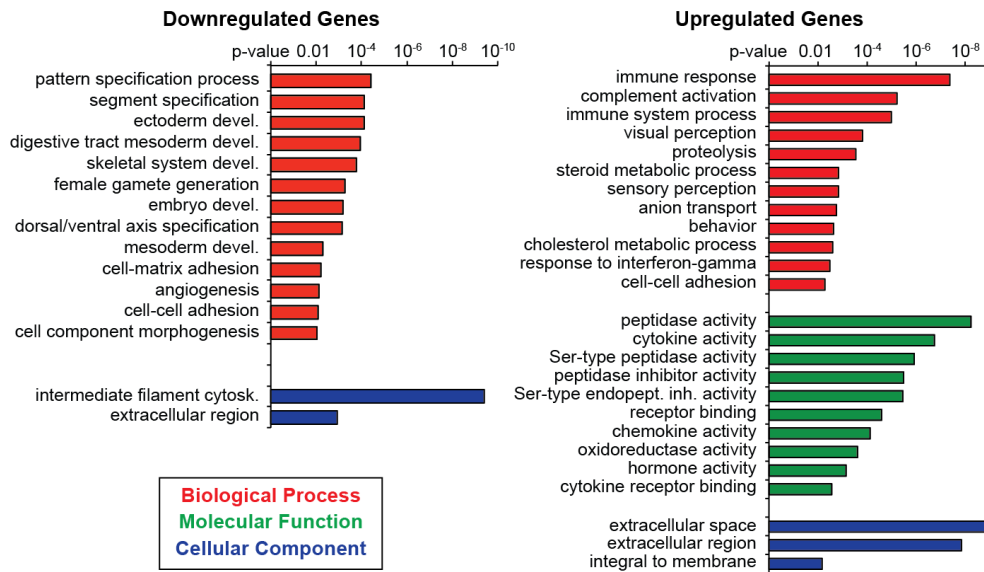

**Supplementary Figure 4 | Significantly enriched GO terms for differentially expressed genes in zebrafish**

GO enrichment analyses performed using PANTHER for the 248 and 609 downregulated and upregulated genes in zebrafish.

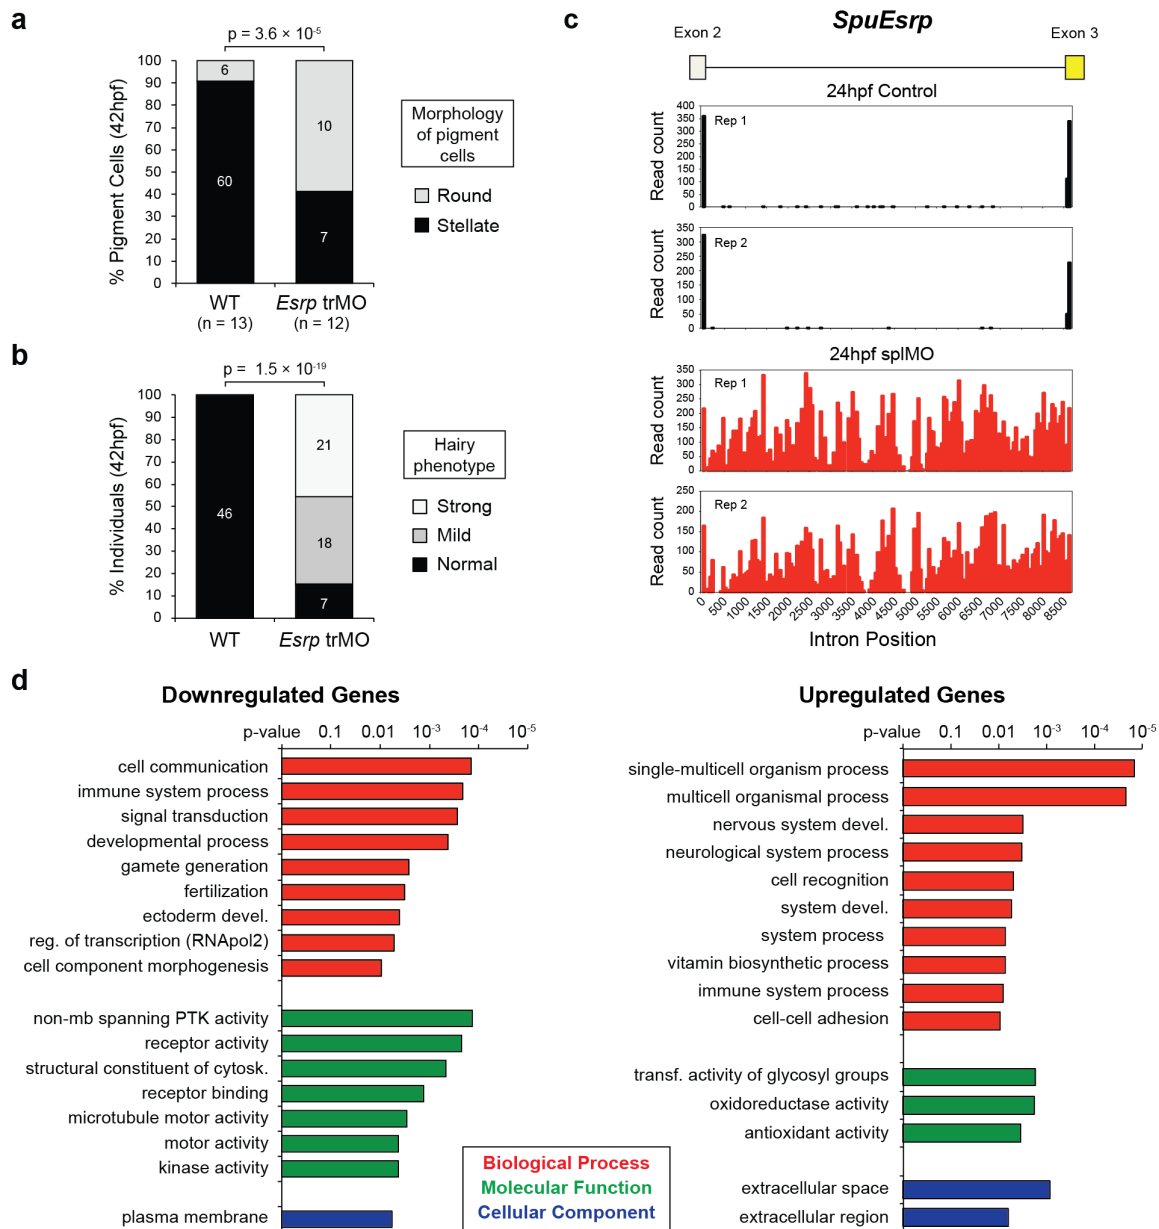

### Supplementary Figure 5 | Developmental and transcriptomic impact of *Esrp* in sea urchin

(a) Quantification of pigment cell morphology in control and *Esrp* trMO knockdown embryos at 42hpf. (b) Quantification of the ‘hairy’ phenotype in control and *Esrp* trMO knockdown embryos at 42hpf. Values correspond to the sum of three (a) or two (b) independent experiments. P-values correspond to 2-way (a) or 3-way (b) two-sided Fisher Exact tests. (c) RNA-seq reads mapping to the genomic region spanning exons 2 and 3 of *Esrp* in control and SplMO injected embryos. (d) GO terms enriched in genes with downregulated and upregulated expression in 24hpf embryos upon splMO treatment. GO analyses was performed using PANTHER for the 580 and 290 downregulated and upregulated genes, respectively, that could be converted to SPU gene identifiers.

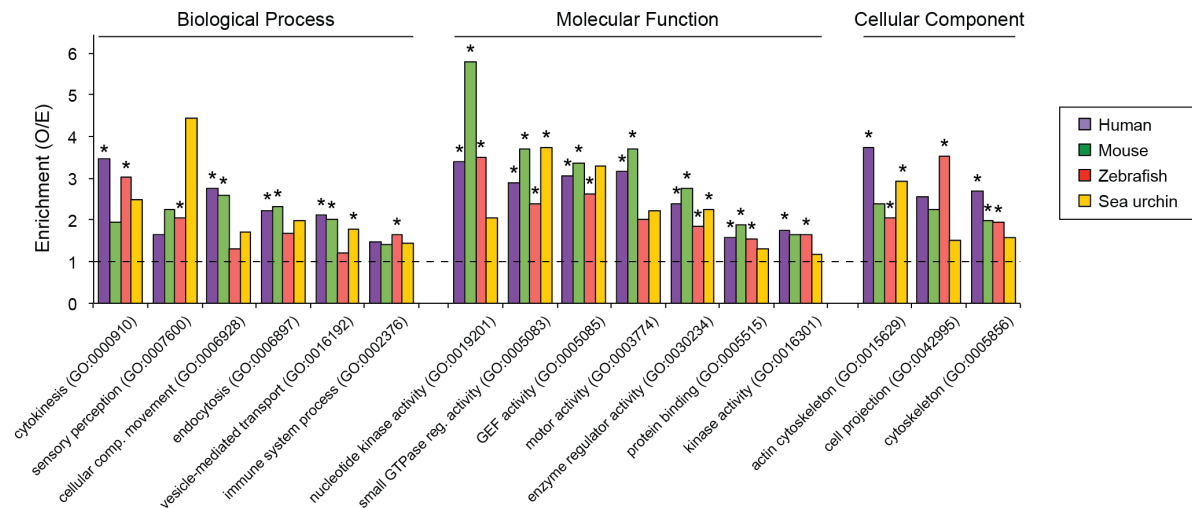

**Supplementary Figure 6 | GO enrichment of genes containing *Esrp*-dependent exons among all studied species**

GO Categories that were significantly overrepresented in at least one species and showed an observed vs. expected enrichment ratio higher than 1.3 for all species. Asterisks indicate significant overrepresentation ( $p < 0.05$ ) in a given species, as calculated by PANTHER.

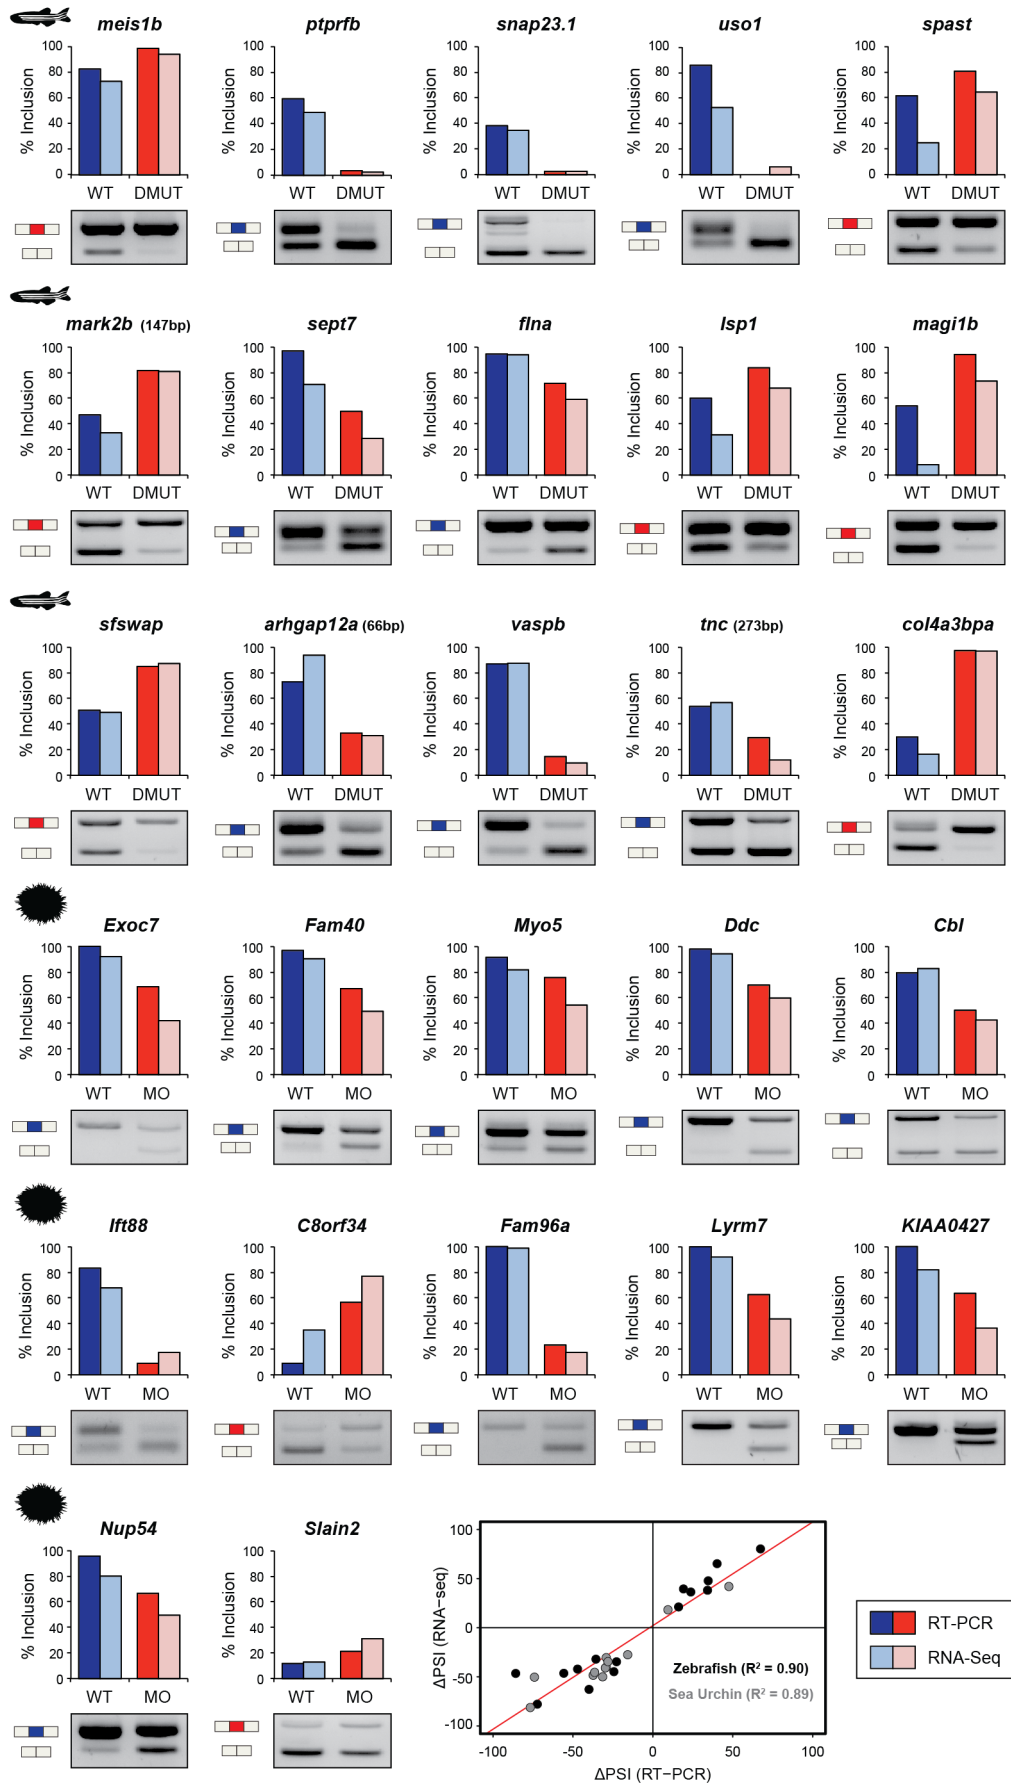

### **Supplementary Figure 7 | Validation of *Esrp*-dependent exons by RT-PCR**

RT-PCR (dark colors) and RNA-seq (light colors) based quantification of exon inclusion for a subset of 15 and 12 representative *Esrp*-dependent exons in WT (blue) and *Esrp*-depleted (red) zebrafish and sea urchin embryos, respectively. Bottom-right: correlation between  $\Delta$ PSI values obtained by RNA-seq and PCRs. Strong correlations are observed both in case of zebrafish ( $R^2=0.90$ , black dots) and sea urchin ( $R^2=0.89$ , grey dots).

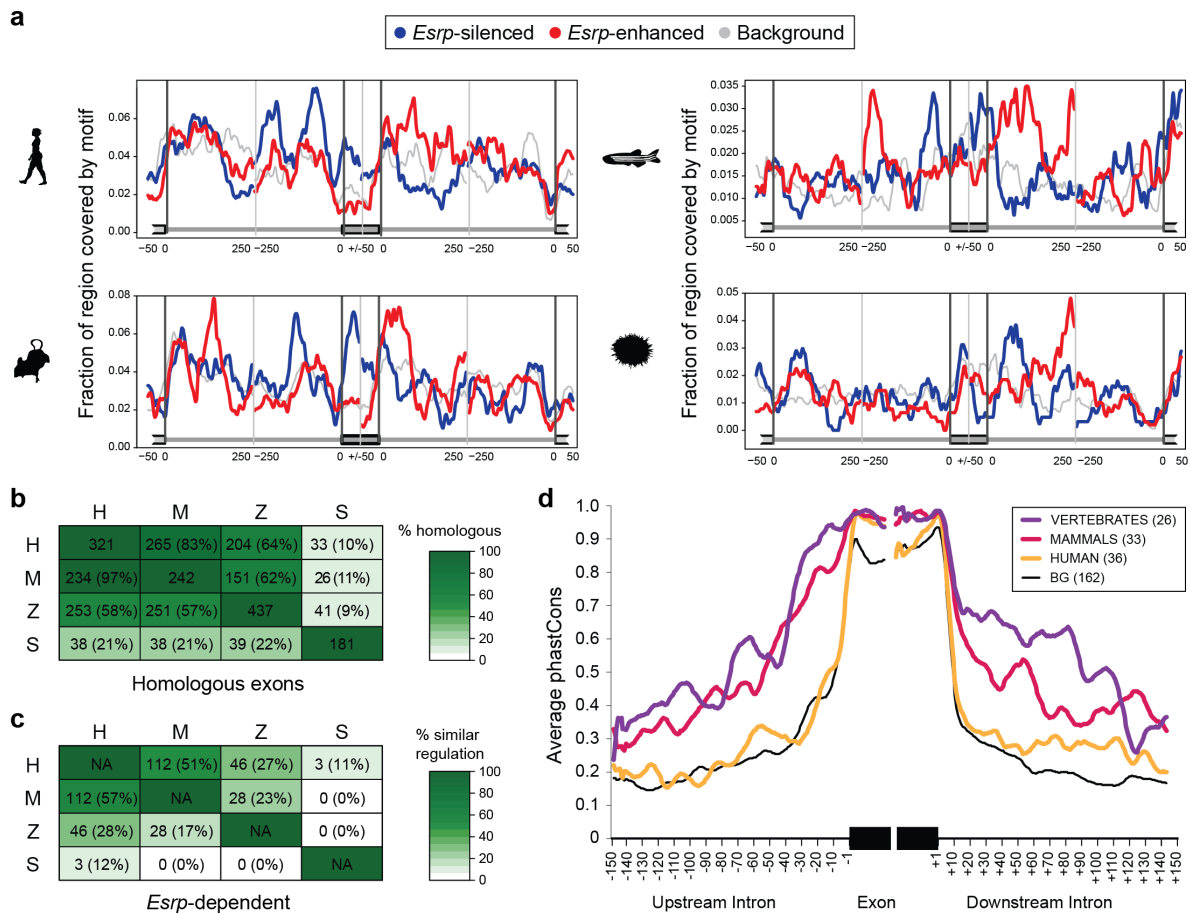

### Supplementary Figure 8 | Comparative analyses of *Esrp*-dependent exons

**(a)** RNA binding map for the top twelve *Esrp* bound 6-mer motifs identified by SELEX-seq. Following the approach described in <sup>15</sup>, the fraction of region covered by the motifs is shown for *Esrp*-enhanced (red), *Esrp*-silenced (blue) and non-regulated exons (grey). A sliding window of 51 nt around the plotted position was used to smoothen the signal. **(b)** Pairwise comparison of the percentage of *Esrp*-dependent exons in each species that have a detected homolog in another species. **(c)** Pairwise comparison of the percentage of *Esrp*-dependent exons in each species whose homologs with sufficient read coverage in another species are also *Esrp*-dependent in the same manner (enhanced/repressed). **(d)** Average placental phastCons score in the neighboring intronic sequences of human *Esrp*-dependent exons with homologs in mouse and zebrafish that have shared regulation among the three vertebrate species (purple, 26 exons), between the two mammals (magenta, 33 exons) or only in humans (yellow, 36 exons). As a reference, non-*Esrp*-dependent exons with homologs in mouse were used (black, 162 exons). A sliding window of 10 nt was used to smoothen the signal by averaging the values for 10 consecutive positions.

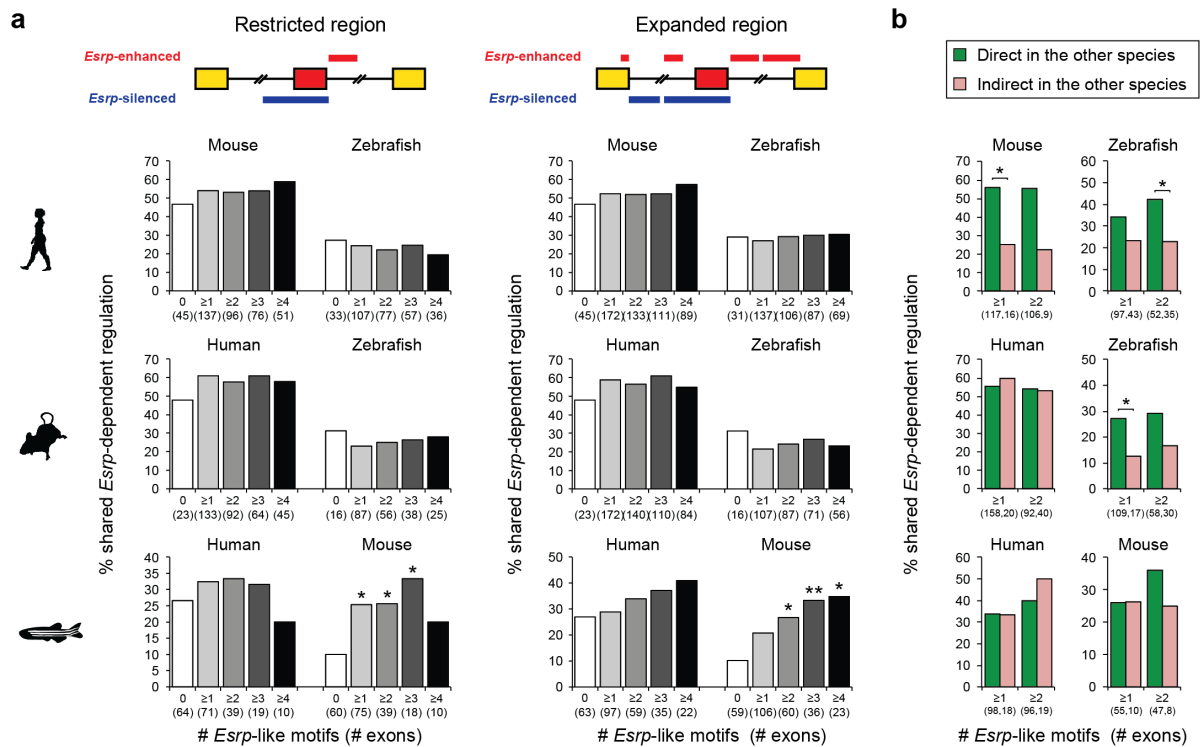

### Supplementary Figure 9 | Association between regulatory conservation and presence of *Esrp*-like motifs

**(a)** Percentage of *Esrp*-dependent exons with 0,  $\geq 1$ ,  $\geq 2$ ,  $\geq 3$  or  $\geq 4$  *Esrp*-like motifs in expected positions that have shared regulation in another species. Two scenarios were used to define expected positions based on the type of regulation (see schemes above). Restricted region: for *Esrp*-silenced exons (blue), motifs must be located in the upstream intronic region (up to 250 nt) or in the exon, and, for *Esrp*-enhanced exons (red), in the downstream intronic region, excluding the first 6 nt (the 5' splice site). Expanded region: in addition to those of the restricted region, we considered, for *Esrp*-silenced exons, the first 250 nt of the upstream intron and, for enhanced exons, the last 250 nt of the downstream intron, the upstream exon and the neighboring upstream intronic sequence excluding the last 50nt. **(b)** Percentage of *Esrp*-dependent exons with *Esrp*-like motifs in expected positions that have shared regulation in another species when the orthologous exon has (green) or does not have (pink) motifs in the equivalent positions for two different thresholds of *Esrp*-like motifs ( $\geq 1$  or  $\geq 2$ ). Only expanded regions were considered in this analysis. Significant comparisons are indicated with \* ( $0.01 < p < 0.05$ ) or \*\* ( $p < 0.01$ ). P-values correspond to 1-tailed Fisher Exact tests of direct versus indirect exons and were not corrected for multiple testing.



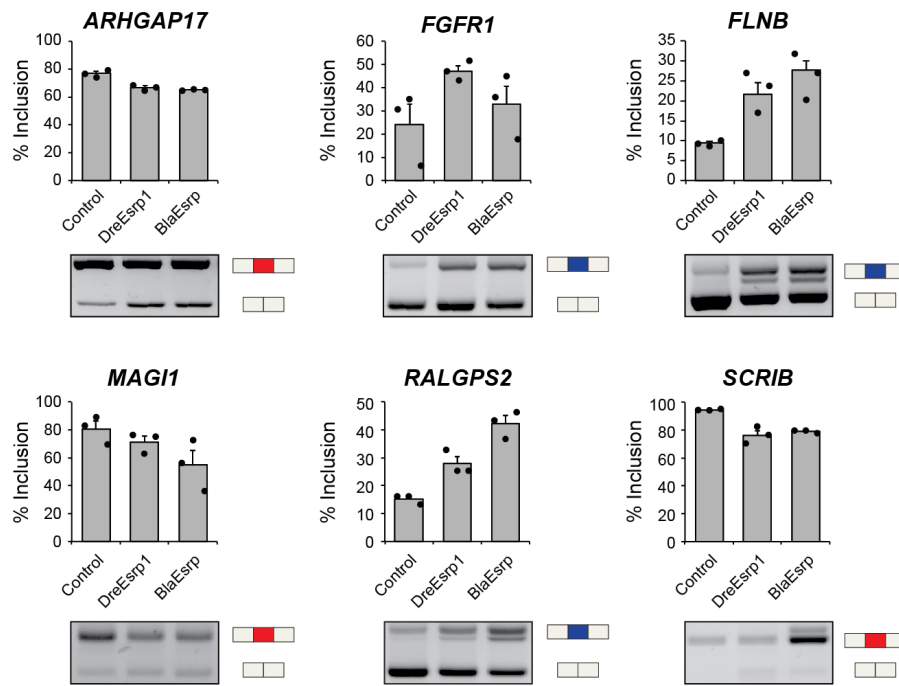

**Supplementary Figure 10 | *Esrp* transcripts from amphioxus and zebrafish change the splicing pattern of endogenous human *Esrp*-dependent exons in 293T cells**

RT-PCR quantifications of  $\Delta$ PSI changes in endogenous exons in 293T cells after transfection of expression vectors containing amphioxus (BlaEsrp) or zebrafish (DreEsrp1) ORF sequences. Error bars correspond to the standard error of three independent replicates.

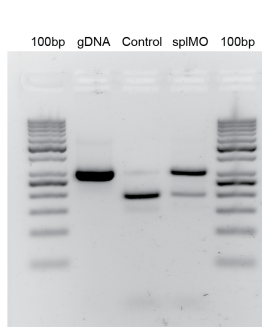

**Fig. 4p**

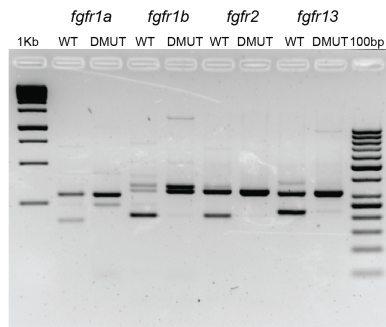

**Fig. 6a**

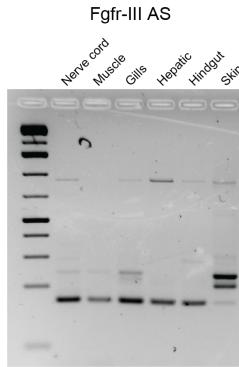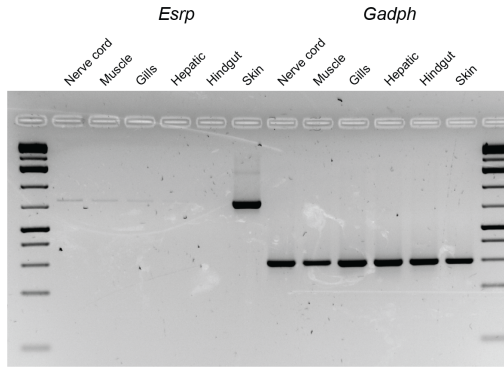

**Fig. 6b**

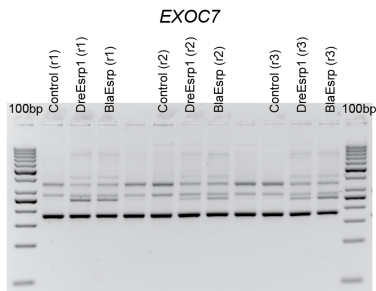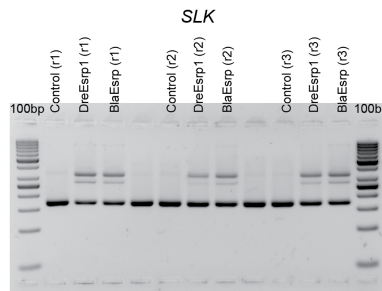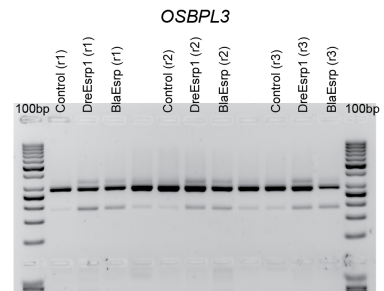

**Fig. 6d**

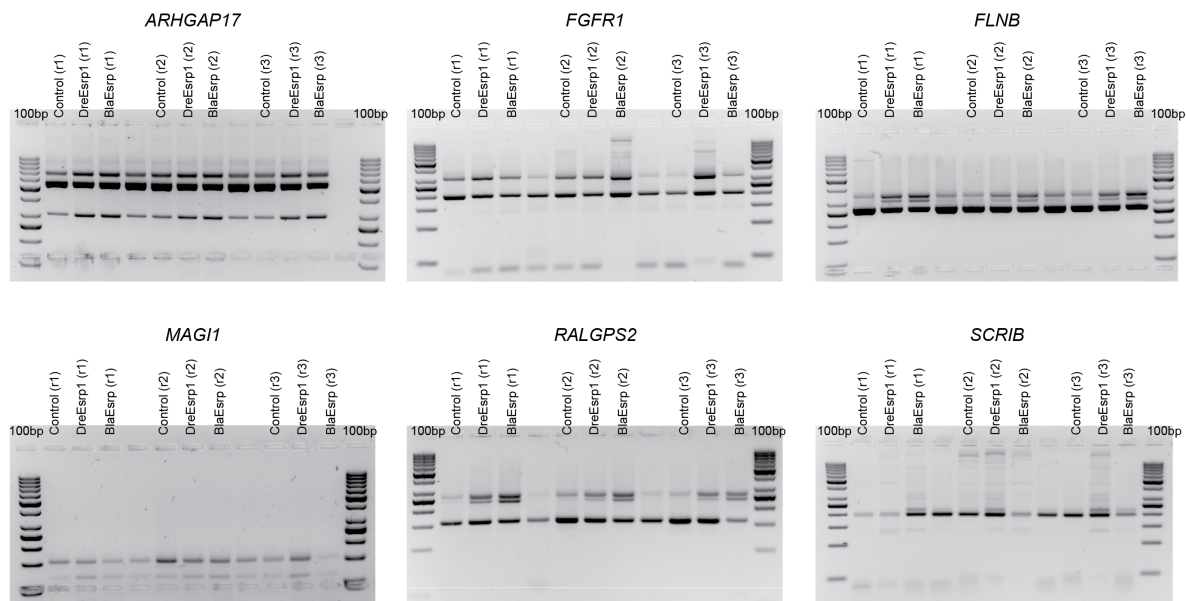

Sup. Fig. 10

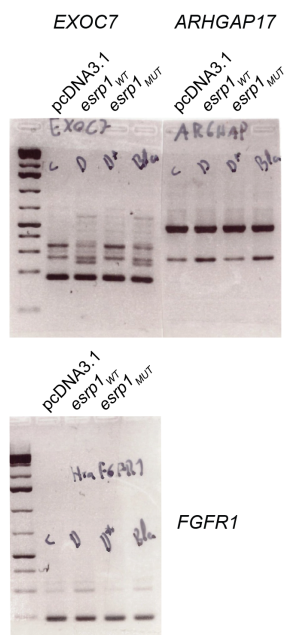

Sup. Fig. 3o

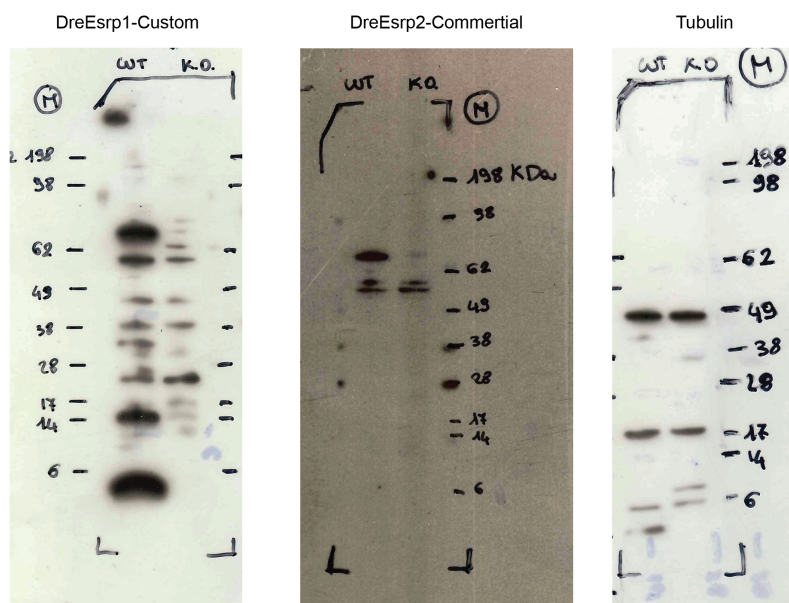

Sup. Fig. 3n

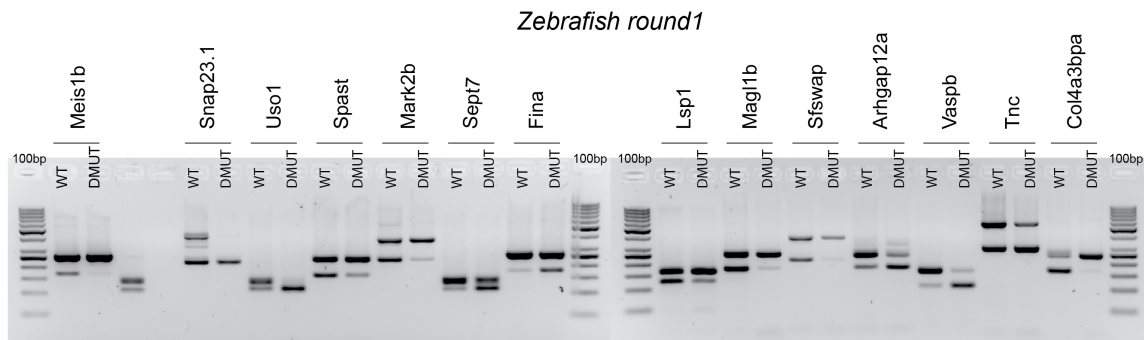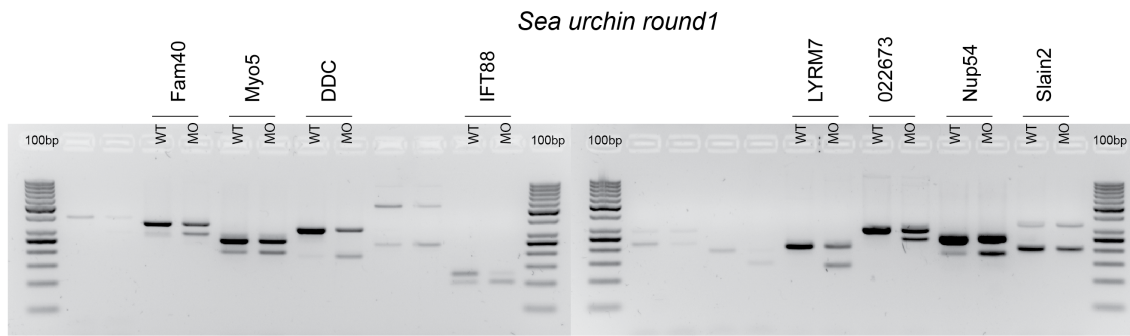

*Zebrafish and sea urchin round 2*

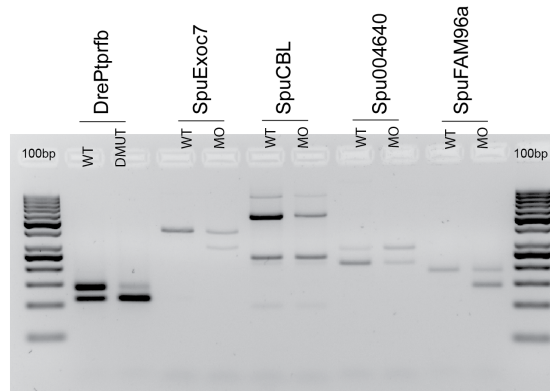

Sup. Fig. 7

Supplementary Figure 11 (part 3/3)

**Supplementary Figure 11 | Complete photos of RT-PCR gels and Western blots for all figures.**
