# Supplementary material for: Evolutionary recruitment of flexible Esrp-dependent splicing programs into diverse embryonic morphogenetic processes
Source: Springer Nature journal article supplement (doi:10.1038/s41467-017-01961-y), 2017-11-21
Supplement: MOESM6 [file 41467_2017_1961_MOESM6_ESM.xlsx]

## Sheet: TableS1
Suplementary Table 1. Differentially expressed genes in zebrafish (WT vs DKO)
Gene_ID	Gene_name	Embr_5dpf_ESRP_WT_a (cRPKM)	Embr_5dpf_ESRP_WT_b (cRPKM)	Embr_5dpf_ESRP_DKO_a (cRPKM)	Embr_5dpf_ESRP_DKO_b (cRPKM)	Log2_Fold_Ch
ENSDARG00000000212	krt97	1301.84	1010.00	202.89	232.28	-2.41
ENSDARG00000000380	pde6a	2.24	1.67	5.56	4.51	1.36
ENSDARG00000000656	psmb9a	1.43	0.83	7.64	4.00	2.36
ENSDARG00000001303	psmb8	1.12	0.42	8.91	6.72	3.34
ENSDARG00000001463	tdh2	0.64	1.09	3.91	3.93	2.19
ENSDARG00000001656	psmb10	1.14	0.78	6.68	6.91	2.82
ENSDARG00000001975	hsd11b2	7.43	5.83	17.53	18.95	1.46
ENSDARG00000002193	rho	264.95	351.53	643.65	857.28	1.28
ENSDARG00000002197	pygl	19.52	23.84	47.66	58.85	1.30
ENSDARG00000002300	p2rx2	1.60	1.44	3.26	4.05	1.26
ENSDARG00000002758	dedd1	5.76	6.02	1.86	1.00	-2.04
ENSDARG00000003132	apip	44.33	39.78	90.26	94.23	1.13
ENSDARG00000003523	itln3	0.16	0.64	4.95	5.56	3.71
ENSDARG00000004078	acsl4a	3.73	2.36	9.89	5.90	1.38
ENSDARG00000004199	spam1	0.86	0.53	2.47	2.39	1.79
ENSDARG00000004262	cyp46a1.2	0.91	0.95	2.88	2.87	1.63
ENSDARG00000004459	unc119.2	1.60	1.81	3.02	4.46	1.13
ENSDARG00000004724	tcea3	11.74	7.37	4.90	3.57	-1.17
ENSDARG00000004748	zgc:100868	15.00	9.26	71.31	34.64	2.13
ENSDARG00000004880	acsm3	2.02	2.03	1.10	0.89	-1.01
ENSDARG00000004939	mtdhb	0.20	0.43	12.29	3.92	4.66
ENSDARG00000005004	slc5a12	1.04	1.24	4.50	4.47	1.97
ENSDARG00000005112	cdh17	13.61	10.23	25.65	23.68	1.05
ENSDARG00000005518	slc5a9	0.95	0.93	2.34	2.35	1.31
ENSDARG00000006029	lta4h	11.47	12.43	33.40	33.85	1.49
ENSDARG00000006220	ugt1ab	28.58	31.61	55.37	65.82	1.01
ENSDARG00000006758	zgc:77415	2.27	1.53	4.69	3.58	1.12
ENSDARG00000007127	acat2	2.48	3.21	8.52	7.02	1.45
ENSDARG00000007241	mycb	35.92	29.84	15.08	9.17	-1.44
ENSDARG00000007276	ela3l	312.86	187.99	495.62	843.61	1.42
ENSDARG00000007377	odc1	8.17	13.72	67.97	87.73	2.83
ENSDARG00000007418	chmp4c	18.48	17.26	8.33	6.27	-1.29
ENSDARG00000007480	rpe65a	30.03	41.73	86.05	82.23	1.23
ENSDARG00000007576	crybb1l1	2.86	15.29	144.04	252.24	4.45
ENSDARG00000007708	nsa2	651.45	695.56	115.44	166.37	-2.26
ENSDARG00000007715	lgsn	0.32	0.61	10.78	13.72	4.73
ENSDARG00000007823	atf3	3.79	6.14	16.97	10.15	1.45
ENSDARG00000007988	masp2	1.85	1.48	3.35	3.91	1.12
ENSDARG00000008263	mfsd4b	1.33	1.15	3.27	2.79	1.29
ENSDARG00000008969	fgb	32.00	37.73	93.34	95.94	1.44
ENSDARG00000009087	cd74a	2.35	1.90	4.62	8.15	1.59
ENSDARG00000009153	pla2g1b	25.81	14.89	8.34	7.33	-1.38
ENSDARG00000009443	zgc:92137	43.45	12.06	82.34	132.41	1.95
ENSDARG00000009477	prkar2ab	1.52	0.68	3.21	2.79	1.45
ENSDARG00000009822	her4.4	4.74	3.04	0.00	0.23	-5.01
ENSDARG00000010267	dpydb	4.97	5.06	11.42	9.87	1.09
ENSDARG00000010347	acer1	1.21	0.96	6.03	3.77	2.18
ENSDARG00000010487	sae1	6.51	7.61	16.94	18.08	1.31
ENSDARG00000010572	slc25a25a	9.48	12.67	25.27	19.57	1.02
ENSDARG00000010658	insig1	5.67	4.81	18.19	14.31	1.63
ENSDARG00000010729	CABZ01073795.1	2.02	0.67	4.95	4.19	1.77
ENSDARG00000011245	esrp1	32.92	17.81	7.65	3.14	-2.23
ENSDARG00000011618	slc26a2	10.79	4.94	3.13	1.13	-1.88
ENSDARG00000011862	inaa	7.62	6.83	14.89	16.01	1.10
ENSDARG00000011956	dlx4a	12.73	15.51	8.02	5.62	-1.05
ENSDARG00000011998	bfsp2	0.85	3.95	25.32	32.67	3.59
ENSDARG00000012076	apoa1a	727.92	1140.75	2205.38	3303.20	1.56
ENSDARG00000012390	kcnk5b	2.67	2.36	5.15	6.08	1.16
ENSDARG00000012395	mmp13a	3.26	2.89	38.37	38.70	3.64
ENSDARG00000012422	col11a2	6.20	4.92	17.48	10.93	1.35
ENSDARG00000012694	c3a.1	10.50	7.97	22.24	19.07	1.16
ENSDARG00000012789	plek2	4.08	2.63	7.05	9.63	1.32
ENSDARG00000013522	pck1	32.09	27.67	107.11	125.27	1.96
ENSDARG00000013598	tnfb	0.95	1.19	7.37	4.14	2.42
ENSDARG00000013721	g6pca.2	35.40	26.02	65.83	66.34	1.11
ENSDARG00000013871	slc5a1	4.88	2.67	9.61	10.10	1.39
ENSDARG00000014017	rrm1	7.78	7.79	22.17	15.09	1.26
ENSDARG00000014024	ms4a17a.4	0.97	0.95	3.63	3.30	1.85
ENSDARG00000014031	abcc2	9.72	6.90	21.47	18.63	1.27
ENSDARG00000014626	dlx3b	40.96	36.16	19.89	7.66	-1.48
ENSDARG00000014685	esco2	1.87	1.92	6.16	3.25	1.31
ENSDARG00000015343	pgd	11.87	11.39	33.11	33.73	1.52
ENSDARG00000015355	fosl1a	4.14	6.39	51.30	16.39	2.69
ENSDARG00000015422	ppil1	104.14	92.02	40.20	50.68	-1.11
ENSDARG00000015559	fstl1a	36.04	35.46	18.55	12.32	-1.21
ENSDARG00000016301	zgc:65894	14.93	18.42	32.12	35.49	1.02
ENSDARG00000016319	c9	29.00	34.34	71.28	80.74	1.26
ENSDARG00000016706	atic	5.17	3.66	11.60	12.01	1.42
ENSDARG00000016793	crybb1l2	9.16	41.24	231.22	424.62	3.70
ENSDARG00000016830	rimkla	7.04	5.68	15.61	13.57	1.20
ENSDARG00000017127	pdzk1ip1	1.52	1.32	3.61	2.79	1.17
ENSDARG00000017174	dlx2b	6.65	5.51	3.62	2.18	-1.07
ENSDARG00000017314	CELA1 (1 of 7)	629.05	456.03	1280.74	2163.87	1.67
ENSDARG00000017489	zgc:123068	14.97	21.12	59.57	62.18	1.75
ENSDARG00000017490	cel.1	42.99	25.24	76.16	110.70	1.45
ENSDARG00000017624	krt4	20538.33	17585.74	5385.85	4325.58	-1.97
ENSDARG00000017794	sdr16c5b	26.44	17.05	46.34	50.52	1.15
ENSDARG00000018263	pdia2	45.02	33.86	90.99	122.44	1.44
ENSDARG00000018283	cyba	9.97	11.22	29.03	18.03	1.15
ENSDARG00000018351	hpda	20.64	9.22	31.92	42.29	1.31
ENSDARG00000018574	sf3b4	6.19	7.13	14.64	12.45	1.02
ENSDARG00000018621	slc6a19a	2.46	1.75	4.04	4.71	1.06
ENSDARG00000018623	rad54l	1.55	1.51	3.82	2.41	1.03
ENSDARG00000018814	esrp2	15.15	9.20	4.84	1.51	-1.94
ENSDARG00000018856	dclk1a	2.12	1.61	4.33	4.26	1.21
ENSDARG00000019013	barhl1b	1.65	0.79	3.00	2.64	1.21
ENSDARG00000019122	he1b	6.95	6.88	0.83	2.14	-2.21
ENSDARG00000019142	fam185a	4.09	3.31	1.96	1.10	-1.27
ENSDARG00000019228	mogat2	4.99	3.30	23.60	18.09	2.33
ENSDARG00000019492	shbg	10.86	10.39	23.49	25.23	1.20
ENSDARG00000019532	fads2	5.15	4.97	12.26	9.70	1.12
ENSDARG00000019752	rom1a	3.10	2.18	7.30	5.75	1.31
ENSDARG00000019838	ugdh	5.15	4.76	13.37	9.56	1.21
ENSDARG00000019949	serpinh1b	17.15	22.09	8.93	3.62	-1.64
ENSDARG00000020114	slc20a1a	1.96	2.00	7.24	9.64	2.09
ENSDARG00000020122	endou2	0.18	0.72	2.93	7.97	3.60
ENSDARG00000020645	slc7a3a	5.04	2.88	10.28	8.46	1.24
ENSDARG00000020676	dpp3	4.82	4.72	11.48	8.03	1.03
ENSDARG00000020741	fga	23.73	25.05	72.50	70.39	1.55
ENSDARG00000021004	c5	1.91	1.64	3.71	4.81	1.26
ENSDARG00000021184	rbfox1l	25.03	24.42	9.81	4.79	-1.76
ENSDARG00000021339	cpa5	80.97	45.20	511.18	871.79	3.45
ENSDARG00000021579	orc5	2.38	2.76	6.56	4.36	1.09
ENSDARG00000021859	erap1b	1.30	1.20	3.36	2.33	1.18
ENSDARG00000022261	pdzk1	15.81	10.79	41.70	36.58	1.56
ENSDARG00000022303	higd1a	15.08	19.20	40.26	42.29	1.27
ENSDARG00000022372	kng1	17.13	16.95	31.81	44.09	1.16
ENSDARG00000022614	ddx43	0.58	0.29	4.96	2.00	3.01
ENSDARG00000022615	si:ch211-241e1.3	1.51	0.89	3.44	2.28	1.25
ENSDARG00000022767	apobb.1	25.33	16.12	48.40	47.50	1.21
ENSDARG00000023026	pkp2	2.00	1.82	3.89	4.40	1.12
ENSDARG00000023111	plg	14.96	12.02	34.96	29.83	1.26
ENSDARG00000023188	lcp1	5.95	3.91	18.62	13.22	1.69
ENSDARG00000023656	he1a	6.34	6.11	1.17	2.27	-1.85
ENSDARG00000023712	mao	5.13	4.22	12.59	8.93	1.20
ENSDARG00000023861	dnase1l3l	0.32	1.31	5.03	9.78	3.17
ENSDARG00000023950	znhit3	15.20	16.40	7.28	7.36	-1.11
ENSDARG00000024548	cryba4	18.28	91.45	442.73	868.23	3.58
ENSDARG00000024717	selenbp1	7.35	6.40	14.35	13.32	1.01
ENSDARG00000024877	ptgr1	7.84	8.69	19.32	17.80	1.17
ENSDARG00000025024	pnoca	2.37	1.55	3.92	4.20	1.05
ENSDARG00000025043	trip13	1.07	1.16	3.60	2.01	1.33
ENSDARG00000026090	adprm	1.52	1.11	3.37	3.80	1.45
ENSDARG00000026098	RAB7B	3.77	3.69	1.76	1.37	-1.26
ENSDARG00000026726	anxa1a	1245.29	1044.48	570.14	500.44	-1.10
ENSDARG00000026764	ahsg1	7.29	3.29	15.82	20.00	1.76
ENSDARG00000027143	aptx	2.78	2.09	5.21	4.68	1.02
ENSDARG00000027495	elovl4b	3.99	4.81	9.88	8.70	1.08
ENSDARG00000027529	hmox1a	4.19	3.69	8.38	9.09	1.15
ENSDARG00000027582	angptl7	50.40	59.15	27.93	20.30	-1.18
ENSDARG00000027658	irf10	0.76	0.73	4.20	2.87	2.26
ENSDARG00000027689	pold1	2.85	2.75	7.01	5.13	1.12
ENSDARG00000027744	gadd45ba	119.68	111.04	71.03	42.51	-1.02
ENSDARG00000027992	hao2	2.96	2.61	6.41	5.49	1.09
ENSDARG00000028012	tpmt.2	1.54	2.22	3.92	3.99	1.07
ENSDARG00000028306	prph	2.01	2.24	5.24	6.02	1.41
ENSDARG00000028396	fkbp5	29.13	23.66	80.80	81.33	1.62
ENSDARG00000028664	ahsa1a	2.33	3.35	0.70	0.94	-1.79
ENSDARG00000028784	si:dkey-24p1.6	2.82	4.05	0.73	0.46	-2.54
ENSDARG00000028824	slc34a1a	0.57	0.37	2.97	2.22	2.46
ENSDARG00000029356	mboat1	6.56	4.79	3.13	2.34	-1.06
ENSDARG00000029406	h2afx	7.82	13.43	28.73	28.33	1.43
ENSDARG00000029493	f9b	1.46	1.28	4.49	4.47	1.71
ENSDARG00000029695	pgp	6.59	8.00	16.28	15.29	1.11
ENSDARG00000029720	si:dkeyp-9d4.2	0.42	0.15	3.05	2.62	3.33
ENSDARG00000029832	slc26a1	1.70	1.23	3.60	3.32	1.24
ENSDARG00000029936	grtp1a	4.87	4.77	11.96	8.05	1.05
ENSDARG00000030215	matn1	25.26	30.03	73.55	93.19	1.59
ENSDARG00000030349	cryba2a	14.67	37.31	184.89	317.75	3.27
ENSDARG00000030411	crygn2	6.17	33.19	219.96	478.21	4.15
ENSDARG00000030440	rsrp1	9.55	10.32	6.32	3.08	-1.08
ENSDARG00000030758	guca1c	6.54	5.77	16.07	14.39	1.31
ENSDARG00000030896	foxq1a	71.15	56.75	23.13	5.25	-2.17
ENSDARG00000031337	hoxa10b	5.32	5.22	2.42	1.83	-1.31
ENSDARG00000031616	g6pca.1	4.26	2.00	9.99	8.68	1.58
ENSDARG00000031745	si:zfos-2070c2.4	2.13	1.20	4.50	4.81	1.48
ENSDARG00000031885	psmb11	2.11	1.81	11.85	9.58	2.45
ENSDARG00000032405	CKAP4	141.54	169.44	68.39	71.24	-1.16
ENSDARG00000032708	arl4cb	53.54	54.51	26.43	17.66	-1.29
ENSDARG00000032929	cryba1l1	25.87	68.43	351.75	657.09	3.42
ENSDARG00000033144	psme2	10.85	7.47	26.77	19.75	1.34
ENSDARG00000033227	lect2l	11.56	14.63	68.53	66.90	2.37
ENSDARG00000033726	tshba	0.36	0.33	3.47	2.49	3.13
ENSDARG00000034048	zgc:92275	1.88	1.52	3.69	3.89	1.16
ENSDARG00000034063	CABZ01068208.1	1.35	1.02	2.68	2.15	1.02
ENSDARG00000034273	sid4	23.02	26.12	48.39	63.28	1.18
ENSDARG00000034403	zgc:173443	8.92	12.81	2.00	2.54	-2.26
ENSDARG00000034677	scel	139.49	87.09	47.00	33.54	-1.49
ENSDARG00000034836	KRT78 (1 of 2)	90.58	85.25	35.31	18.86	-1.70
ENSDARG00000035028	lpcat4	21.17	20.60	9.01	6.23	-1.45
ENSDARG00000035136	sepw1	791.62	1108.56	460.89	446.10	-1.07
ENSDARG00000035388	tmem174	1.33	1.74	3.44	4.60	1.38
ENSDARG00000035602	dao.1	0.00	0.11	3.54	7.47	6.49
ENSDARG00000035603	dao.2	3.16	2.37	7.66	8.96	1.58
ENSDARG00000035909	mfsd2ab	7.13	6.84	24.84	16.33	1.56
ENSDARG00000036028	arrdc3b	16.87	12.99	53.06	43.09	1.69
ENSDARG00000036445	serpinh2	3.29	2.11	1.16	0.70	-1.54
ENSDARG00000036628	cd74b	5.09	3.67	9.01	12.20	1.28
ENSDARG00000036754	hmgn3	30.51	40.76	67.75	82.83	1.08
ENSDARG00000036776	aldh8a1	3.95	5.18	9.15	10.73	1.12
ENSDARG00000036832	cyt1l	12888.11	18734.52	1354.94	2317.07	-3.11
ENSDARG00000036833	upp2	4.27	2.87	0.49	1.16	-2.12
ENSDARG00000036888	zgc:153935	4.42	3.45	1.28	0.80	-1.92
ENSDARG00000036967	smox	17.25	19.80	43.29	37.65	1.13
ENSDARG00000037000	fkbp11	11.72	13.56	24.77	39.64	1.35
ENSDARG00000037188	rpa2	17.68	18.59	41.72	33.46	1.05
ENSDARG00000037191	ttr	10.63	11.62	104.82	133.08	3.42
ENSDARG00000037267	zgc:158263	20.66	15.59	8.88	4.67	-1.42
ENSDARG00000037278	lrata	12.24	12.43	6.99	3.47	-1.24
ENSDARG00000037281	fgg	67.01	64.47	137.60	137.73	1.07
ENSDARG00000037402	lim2.3	0.53	1.55	3.16	10.19	2.68
ENSDARG00000037640	aurkb	5.19	6.40	14.33	10.10	1.08
ENSDARG00000037679	MPC2 (2 of 2)	7.92	5.48	18.03	13.46	1.23
ENSDARG00000037706	gss	1.05	0.33	4.04	2.28	2.19
ENSDARG00000037845	col9a3	28.17	33.77	68.07	57.60	1.02
ENSDARG00000037946	prl	1.19	1.01	5.39	4.75	2.20
ENSDARG00000038040	tpk1	1.08	1.16	4.72	3.68	1.91
ENSDARG00000038185	gh1	10.48	8.79	22.77	24.81	1.30
ENSDARG00000038378	sagb	44.13	35.60	124.63	84.30	1.39
ENSDARG00000038666	igfbp1b	4.86	3.60	10.86	26.03	2.12
ENSDARG00000038742	RBP1 (2 of 2)	9.73	11.11	24.09	31.75	1.42
ENSDARG00000038785	abcf2a	9.20	7.64	25.95	23.50	1.55
ENSDARG00000038882	smc4	1.40	1.23	6.04	2.53	1.71
ENSDARG00000038891	AL954146.1	8.72	5.87	0.73	0.28	-3.83
ENSDARG00000039041	sfrp5	2.79	3.18	6.47	6.59	1.13
ENSDARG00000039099	zgc:113413	495.79	389.86	25.40	16.07	-4.42
ENSDARG00000039243	zgc:152791	5.90	2.12	23.39	38.82	2.96
ENSDARG00000039268	emc4	12.05	18.61	2.15	5.15	-2.07
ENSDARG00000039381	ch25hl1.1	39.55	41.69	7.98	2.84	-2.91
ENSDARG00000039393	si:ch211-240l19.5	29.74	19.68	49.03	62.21	1.17
ENSDARG00000039422	fuom	9.77	11.34	3.30	2.54	-1.85
ENSDARG00000039453	dhrs7ca	3.68	2.55	0.65	0.41	-2.56
ENSDARG00000039501	ugt2a6	0.48	0.38	4.80	3.69	3.30
ENSDARG00000039517	c8b	3.63	3.05	7.97	6.85	1.15
ENSDARG00000039579	cfd	431.28	455.98	111.55	106.77	-2.02
ENSDARG00000039682	DUPD1 (1 of 11)	14.60	21.53	1.94	5.16	-2.35
ENSDARG00000039730	zgc:112160	252.48	185.90	527.98	781.66	1.58
ENSDARG00000039850	dusp22b	5.68	7.47	2.13	2.20	-1.60
ENSDARG00000040041	mcm4	8.55	8.42	25.22	16.54	1.30
ENSDARG00000040179	zgc:101562	2.67	3.15	1.44	0.88	-1.33
ENSDARG00000040180	slc35a1	11.79	7.45	23.70	18.77	1.14
ENSDARG00000040252	atp1a1a.5	0.88	0.52	4.11	3.05	2.35
ENSDARG00000040282	zgc:92590	11.85	2.05	0.05	0.04	-7.41
ENSDARG00000040284	si:dkey-79d12.5	3.70	4.18	15.42	11.68	1.78
ENSDARG00000040295	apoeb	538.85	473.98	1321.32	1029.44	1.21
ENSDARG00000040401	slc25a20	20.56	24.79	45.87	45.46	1.01
ENSDARG00000040479	cga	0.63	0.56	4.37	4.71	2.94
ENSDARG00000040623	fosl2	3.50	2.70	7.84	5.68	1.12
ENSDARG00000040683	MEP1B (2 of 2)	2.00	1.29	4.65	7.18	1.84
ENSDARG00000040781	sult3st4	3.45	4.41	0.27	0.34	-3.66
ENSDARG00000040959	rabl3	5.96	4.81	3.01	1.94	-1.12
ENSDARG00000041179	crygm5	0.94	2.95	5.69	11.33	2.13
ENSDARG00000041339	zgc:92380	114.32	108.78	53.87	56.26	-1.02
ENSDARG00000041361	ttk	1.27	0.97	4.18	2.22	1.51
ENSDARG00000041433	si:dkey-7c18.24	921.31	223.09	3357.20	4286.69	2.74
ENSDARG00000041595	ces3	8.74	9.95	41.35	69.45	2.57
ENSDARG00000041644	TMEM27	4.03	2.51	9.85	7.07	1.37
ENSDARG00000041645	A2ML1 (2 of 13)	5.95	5.83	11.08	15.92	1.20
ENSDARG00000041724	glipr2	6.85	4.24	2.22	0.85	-1.85
ENSDARG00000041864	capn3a	0.36	1.25	10.47	16.54	4.08
ENSDARG00000041925	cryba2b	72.24	135.83	300.22	607.24	2.12
ENSDARG00000042221	mthfd1l	1.28	1.12	2.60	2.45	1.08
ENSDARG00000042231	stx11b.2	7.27	6.33	3.83	1.51	-1.35
ENSDARG00000042293	ca4b	7.50	6.10	11.40	17.02	1.06
ENSDARG00000042458	rfc4	9.28	10.35	20.62	19.32	1.03
ENSDARG00000042613	crp3	31.56	54.16	91.58	83.87	1.03
ENSDARG00000042667	klf2a	125.80	73.73	45.87	19.15	-1.62
ENSDARG00000042816	mmp9	7.56	6.38	53.41	44.88	2.82
ENSDARG00000042953	cyp2n13	22.75	20.64	46.79	40.35	1.01
ENSDARG00000042993	try	859.44	615.15	1728.65	3082.32	1.71
ENSDARG00000043089	alox5b.2	4.54	2.16	0.29	0.12	-4.06
ENSDARG00000043135	pomca	3.04	2.42	42.37	33.76	3.80
ENSDARG00000043171	CELA1 (3 of 7)	11.87	8.21	32.07	27.84	1.58
ENSDARG00000043175	CELA1 (5 of 7)	1.61	1.33	8.58	12.82	2.86
ENSDARG00000043279	aqp12	19.05	22.25	33.71	50.24	1.02
ENSDARG00000043342	gpx3	2.34	2.52	5.65	6.02	1.26
ENSDARG00000043482	B3GNT3 (1 of 4)	13.45	8.40	4.12	3.54	-1.51
ENSDARG00000043492	irf1a	1.72	1.41	6.93	5.53	2.00
ENSDARG00000043667	CLMN (1 of 2)	2.47	2.58	1.55	0.79	-1.11
ENSDARG00000043719	c3a.6	2.06	1.18	3.62	3.92	1.22
ENSDARG00000043781	PSMB10	5.66	4.78	26.71	29.73	2.43
ENSDARG00000043802	ms4a17a.9	2.65	2.22	22.67	16.45	3.00
ENSDARG00000043864	nptnb	5.56	4.44	10.76	11.30	1.14
ENSDARG00000043986	setd6	3.69	3.22	1.44	1.15	-1.42
ENSDARG00000043997	cyp2x8	0.35	0.17	3.42	4.81	3.98
ENSDARG00000044002	cyp2x7	2.16	2.08	1.17	0.90	-1.04
ENSDARG00000044047	slc18b1	1.34	0.96	2.52	2.24	1.05
ENSDARG00000044280	opn1mw2	8.31	3.13	40.84	37.65	2.78
ENSDARG00000044526	camk1ga	4.27	3.71	8.74	9.60	1.20
ENSDARG00000044684	rbp4l	116.67	129.54	263.00	390.91	1.41
ENSDARG00000044685	nr0b2a	2.62	2.04	6.43	5.35	1.34
ENSDARG00000044688	dusp4	3.67	1.60	8.65	6.38	1.52
ENSDARG00000044807	dck	2.08	2.54	8.70	4.32	1.49
ENSDARG00000044862	opn1lw1	0.86	0.38	7.33	11.55	3.93
ENSDARG00000044875	crygm2e	0.61	0.84	2.12	4.40	2.18
ENSDARG00000044923	ube2w	6.77	7.45	3.97	1.93	-1.27
ENSDARG00000044973	zgc:171226	0.43	0.29	3.00	4.15	3.31
ENSDARG00000044975	krt94	37.72	42.58	76.97	91.21	1.07
ENSDARG00000045016	npffl	3.61	3.76	10.06	10.52	1.48
ENSDARG00000045095	elac1	12.77	13.13	5.87	6.02	-1.12
ENSDARG00000045190	ch25h	3.06	4.79	15.16	7.81	1.55
ENSDARG00000045219	dkk1b	8.56	10.65	3.25	2.14	-1.83
ENSDARG00000045422	otulina	1.69	2.66	6.65	7.75	1.73
ENSDARG00000045442	cpb1	117.87	71.39	188.43	242.39	1.19
ENSDARG00000045638	slc13a1	1.63	1.06	3.74	3.13	1.36
ENSDARG00000045661	irf7	2.11	1.69	10.12	11.39	2.50
ENSDARG00000045797	C25H12orf73	8.48	13.93	23.04	27.50	1.17
ENSDARG00000045834	si:dkey-14d8.7	4.88	2.08	9.98	14.63	1.82
ENSDARG00000045904	nr2e3	3.87	2.55	7.46	6.35	1.10
ENSDARG00000045980	cst14b.1	113.90	98.19	43.20	38.37	-1.38
ENSDARG00000046098	ebp	1.83	1.97	4.22	3.68	1.06
ENSDARG00000051876	ush1c	3.15	2.36	5.36	7.01	1.17
ENSDARG00000052000	cav2	38.26	25.82	15.44	9.20	-1.38
ENSDARG00000052039	caspb	76.30	90.40	36.44	21.11	-1.53
ENSDARG00000052057	pcolceb	1.70	0.86	5.56	5.04	2.05
ENSDARG00000052113	hexa	4.15	4.57	13.43	12.24	1.56
ENSDARG00000052348	smarca5	5.37	5.38	13.77	8.76	1.07
ENSDARG00000052437	mia	16.90	15.50	32.43	46.48	1.28
ENSDARG00000052705	pkp1b	16.03	8.58	4.45	3.22	-1.68
ENSDARG00000052721	prim2	4.45	4.23	11.34	7.32	1.10
ENSDARG00000053136	b2m	5.32	2.51	12.97	11.97	1.67
ENSDARG00000053323	zgc:112285	0.95	1.26	4.10	5.35	2.10
ENSDARG00000053448	si:ch211-251f6.6	45.44	62.91	13.25	21.21	-1.65
ENSDARG00000053449	pyya	6.88	8.58	14.96	19.54	1.16
ENSDARG00000053509	kazald3	7.34	10.86	3.68	2.85	-1.48
ENSDARG00000053646	adrb3a	3.98	3.37	1.98	1.36	-1.14
ENSDARG00000053853	slc13a2	15.74	10.18	34.37	35.51	1.43
ENSDARG00000053862	crygmx	1.80	7.23	15.52	49.82	2.85
ENSDARG00000053875	cryba1b	5.25	30.49	249.06	406.28	4.20
ENSDARG00000054026	mustn1a	2.45	2.85	0.65	1.52	-1.29
ENSDARG00000054033	hoxb1b	2.66	2.95	1.44	1.17	-1.11
ENSDARG00000054060	pof1b	31.64	16.42	10.91	4.38	-1.65
ENSDARG00000054155	pcna	74.96	83.28	198.42	145.32	1.12
ENSDARG00000054300	dhrs1	28.55	25.61	59.62	60.32	1.15
ENSDARG00000054610	coro1a	12.88	9.33	23.10	23.85	1.08
ENSDARG00000054748	cuedc1b	1.76	0.59	6.26	3.19	2.00
ENSDARG00000055036	itih3a	2.18	2.11	6.05	8.42	1.75
ENSDARG00000055192	zgc:136930	2708.01	2242.06	801.20	851.17	-1.58
ENSDARG00000055226	slc7a7	3.30	2.69	8.71	7.86	1.47
ENSDARG00000055278	cfb	11.95	10.94	27.90	23.08	1.15
ENSDARG00000055365	si:dkey-25e12.3	0.84	0.74	5.80	4.00	2.63
ENSDARG00000055395	foxq1b	35.52	20.76	6.41	3.08	-2.57
ENSDARG00000055439	adamtsl7	13.96	10.27	4.25	3.17	-1.71
ENSDARG00000055514	icn2	3479.32	5565.42	1030.02	1205.09	-2.02
ENSDARG00000055523	slc22a6l	1.43	1.28	7.17	4.50	2.11
ENSDARG00000055592	capn2b	32.41	26.10	12.51	5.02	-1.74
ENSDARG00000055644	zgc:101788	3.02	2.78	14.09	7.65	1.91
ENSDARG00000055854	nr4a3	2.38	2.85	6.29	12.03	1.81
ENSDARG00000055876	msmo1	6.04	6.11	13.36	11.15	1.01
ENSDARG00000056015	hoxb13a	5.38	4.51	2.64	1.83	-1.14
ENSDARG00000056247	bricd5	2.97	2.93	8.46	8.37	1.51
ENSDARG00000056248	KRT78 (2 of 2)	2786.35	2576.17	819.05	787.93	-1.74
ENSDARG00000056314	a2ml	11.70	6.69	34.49	19.39	1.55
ENSDARG00000056462	crp2	1.98	3.51	7.84	11.73	1.83
ENSDARG00000056473	chaf1b	1.74	1.17	5.54	2.74	1.50
ENSDARG00000056477	ccdc125	19.75	19.13	8.86	6.01	-1.39
ENSDARG00000056511	arr3a	55.85	45.03	119.46	123.05	1.27
ENSDARG00000056587	cyp2r1	5.99	4.15	1.27	0.44	-2.58
ENSDARG00000056605	wbp2	1.70	1.02	3.55	3.11	1.29
ENSDARG00000056643	slc22a7b.1	1.41	1.39	3.25	2.75	1.10
ENSDARG00000056744	ela2	295.82	171.21	745.79	1196.56	2.06
ENSDARG00000056795	serpine1	4.13	6.12	14.92	12.53	1.42
ENSDARG00000056873	and3	537.46	709.74	171.76	116.36	-2.11
ENSDARG00000057004	FGL1	7.29	6.76	3.12	2.78	-1.25
ENSDARG00000057100	zwilch	1.24	0.78	3.27	2.35	1.48
ENSDARG00000057169	abca4a	2.77	2.08	4.94	4.91	1.02
ENSDARG00000057460	crygm2d13	32.59	95.64	487.68	1018.26	3.55
ENSDARG00000057661	aldoca	2.79	2.47	5.21	5.78	1.06
ENSDARG00000057789	lyz	70.72	82.14	170.23	157.36	1.10
ENSDARG00000057859	hoxd10a	3.51	4.36	2.18	1.61	-1.05
ENSDARG00000058082	birc7	0.85	0.46	6.89	2.06	2.76
ENSDARG00000058371	krt5	4191.18	2384.27	1133.69	844.89	-1.73
ENSDARG00000058462	zgc:158846	63.76	59.15	128.03	149.04	1.17
ENSDARG00000058567	avp	0.86	1.62	2.56	3.19	1.22
ENSDARG00000058570	ccl27a	166.30	189.30	4.34	6.73	-5.00
ENSDARG00000058803	grk1a	2.42	1.94	5.31	4.32	1.14
ENSDARG00000059001	pim2	17.73	11.16	5.82	3.51	-1.63
ENSDARG00000059235	zgc:113274	4.78	2.71	0.49	0.11	-3.64
ENSDARG00000059263	hoxd12a	2.03	2.45	1.22	0.76	-1.18
ENSDARG00000059267	hoxd11a	3.25	2.90	1.69	1.22	-1.08
ENSDARG00000059360	srsf3b	20.40	29.19	61.51	52.19	1.20
ENSDARG00000060126	acyp1	6.68	7.72	3.88	2.61	-1.15
ENSDARG00000060246	slc16a6b	1.33	1.42	7.28	6.83	2.35
ENSDARG00000060316	cish	30.81	44.41	14.93	10.50	-1.57
ENSDARG00000060350	apoda.2	125.41	89.57	309.93	330.31	1.57
ENSDARG00000060354	samd7	1.17	0.80	4.29	4.19	2.11
ENSDARG00000060622	si:ch73-14h1.2	4.25	2.73	1.74	1.70	-1.02
ENSDARG00000060889	si:ch211-173n18.4	4.84	5.65	9.64	15.20	1.24
ENSDARG00000061120	slc43a2b	23.49	16.68	48.40	41.21	1.16
ENSDARG00000062132	cyp4v8	11.80	7.87	22.16	19.47	1.08
ENSDARG00000062315	sik2b	4.28	2.87	8.55	7.97	1.21
ENSDARG00000062788	irg1l	2.84	2.92	15.79	9.75	2.15
ENSDARG00000062906	kcnv2b	0.66	0.64	2.28	2.50	1.88
ENSDARG00000063518	CPN2	2.56	2.69	7.48	10.75	1.80
ENSDARG00000063634	hpse	3.61	2.98	10.44	6.88	1.40
ENSDARG00000063684	ppm1h	1.38	1.28	3.93	2.67	1.31
ENSDARG00000067701	myoz3a	9.07	9.96	20.26	18.05	1.01
ENSDARG00000068233	CD53	1.51	0.88	2.61	2.66	1.13
ENSDARG00000068436	H3F3B	26.72	9.74	108.64	46.81	2.09
ENSDARG00000068465	zgc:136254	4.47	7.72	0.31	0.40	-4.12
ENSDARG00000068493	si:zfos-411a11.2	1.23	0.78	8.31	6.43	2.88
ENSDARG00000068507	crybb1	9.47	49.03	472.10	859.49	4.51
ENSDARG00000068515	chs1	3.18	3.24	6.06	6.90	1.01
ENSDARG00000068680	ctrl	142.65	110.01	219.23	409.91	1.32
ENSDARG00000068782	spg20a	2.48	1.52	11.15	5.84	2.09
ENSDARG00000068939	XAF1	4.85	3.14	12.55	10.90	1.55
ENSDARG00000069089	agrp	3.56	4.80	16.51	15.72	1.95
ENSDARG00000069093	col2a1a	59.15	69.68	145.81	122.05	1.06
ENSDARG00000069192	zgc:163030	76.17	98.23	40.64	38.08	-1.15
ENSDARG00000069244	si:ch211-244b2.2	2.41	1.79	5.41	4.36	1.22
ENSDARG00000069245	matn3a	3.37	4.15	0.90	1.42	-1.70
ENSDARG00000069265	matn3b	2.08	2.68	0.95	0.73	-1.50
ENSDARG00000069311	zgc:195175	0.55	0.60	2.17	2.07	1.89
ENSDARG00000069342	zgc:153115	1.79	1.49	3.86	2.85	1.03
ENSDARG00000069381	si:ch211-125e6.5	10.28	8.48	68.51	54.91	2.72
ENSDARG00000069505	zgc:136892	8.69	7.81	22.47	16.67	1.25
ENSDARG00000069548	zgc:162780	3.22	3.12	6.60	6.57	1.05
ENSDARG00000069583	CNDP1	34.97	39.33	74.92	82.70	1.08
ENSDARG00000069607	SUSD3 (2 of 2)	3.44	2.67	6.50	6.05	1.04
ENSDARG00000069708	cdc34a	41.14	46.47	21.18	14.32	-1.30
ENSDARG00000069752	ckba	40.60	45.92	87.28	94.72	1.07
ENSDARG00000069780	pus7l	3.44	2.89	1.37	0.91	-1.47
ENSDARG00000069792	crygm2d5	2.20	10.64	25.59	77.23	3.00
ENSDARG00000069801	crygm2d12	6.71	36.73	136.44	313.18	3.37
ENSDARG00000069817	crygm2d8	10.53	35.79	213.94	316.20	3.52
ENSDARG00000069826	crygm2d15	6.28	29.64	159.27	266.29	3.57
ENSDARG00000069827	crygm2d11	5.64	20.76	89.68	201.86	3.46
ENSDARG00000069978	si:ch211-67e16.2	1.45	1.69	4.03	2.60	1.08
ENSDARG00000070021	cyp3c4	2.57	2.09	5.95	4.54	1.17
ENSDARG00000070029	ehhadh	2.63	2.53	7.43	7.25	1.51
ENSDARG00000070057	si:dkey-69o16.5	26.35	25.87	47.85	64.07	1.10
ENSDARG00000070061	gfer	3.69	5.00	9.69	9.25	1.13
ENSDARG00000070386	krtcap2	3.48	4.63	14.29	17.87	1.99
ENSDARG00000070401	MAL (3 of 3)	1.25	1.26	3.83	4.40	1.72
ENSDARG00000070480	agr2	48.30	87.32	177.54	156.62	1.30
ENSDARG00000070516	si:dkeyp-52c3.2	0.00	0.00	14.57	9.75	13.57
ENSDARG00000070537	stmn2b	12.41	15.94	26.33	34.68	1.10
ENSDARG00000070542	mafbb	2.37	3.00	7.46	5.78	1.30
ENSDARG00000070558	si:ch211-93g23.2	1.74	2.36	4.89	7.13	1.55
ENSDARG00000070565	adap2	1.00	0.74	2.17	2.00	1.26
ENSDARG00000070683	dkk3b	3.95	4.22	10.39	6.89	1.08
ENSDARG00000070775	cyp2x9	0.54	0.36	26.86	28.21	5.93
ENSDARG00000070780	rln3a	1.94	2.08	4.69	5.03	1.27
ENSDARG00000070858	si:busm1-105l16.2	7.14	10.31	2.47	3.30	-1.60
ENSDARG00000070960	si:ch211-288g17.4	6.17	7.14	13.16	16.72	1.17
ENSDARG00000071048	wisp3	1.73	1.06	4.28	2.63	1.30
ENSDARG00000071345	mgst2	24.50	23.08	60.91	41.11	1.10
ENSDARG00000071657	si:dkey-19a16.4	0.82	0.16	5.78	2.19	3.02
ENSDARG00000071684	rx1	1.98	1.55	4.36	3.29	1.11
ENSDARG00000073699	col9a1a	27.71	27.66	73.10	54.02	1.20
ENSDARG00000073750	crygm2d9	3.67	6.94	18.38	66.67	3.00
ENSDARG00000073820	zgc:174917	0.84	0.59	9.59	3.70	3.22
ENSDARG00000073845	zgc:110843	13.38	12.36	6.98	4.54	-1.16
ENSDARG00000073874	crygm2d6	20.40	31.69	81.46	122.84	1.97
ENSDARG00000073961	si:ch211-160j14.2	1.86	2.90	4.83	4.92	1.04
ENSDARG00000073994	si:ch211-276k2.1	0.44	0.11	5.55	9.37	4.73
ENSDARG00000074001	crygmxl2	23.92	63.57	262.06	461.48	3.05
ENSDARG00000074002	slc6a11a	6.01	4.92	3.06	1.35	-1.30
ENSDARG00000074217	si:dkey-188i13.6	5.50	8.99	14.67	20.71	1.29
ENSDARG00000074322	si:ch211-194m7.3	2.82	1.36	10.34	4.95	1.87
ENSDARG00000074476	odam	3.72	5.15	8.33	9.88	1.04
ENSDARG00000074487	CR762483.1	1.77	2.25	5.10	5.44	1.39
ENSDARG00000074613	si:ch211-240l19.6	25.06	19.75	54.89	57.04	1.32
ENSDARG00000074642	zgc:153932	1.71	0.43	9.13	3.40	2.55
ENSDARG00000074656	ctssb.1	3.47	3.53	12.19	11.79	1.78
ENSDARG00000074698	sdsl	2.13	0.88	6.24	3.27	1.66
ENSDARG00000074760	ttc7a	1.94	1.02	3.67	3.16	1.21
ENSDARG00000074809	zgc:194392	4.02	4.17	9.76	8.11	1.13
ENSDARG00000074919	BFSP1	0.16	0.04	7.73	2.77	5.70
ENSDARG00000074947	fam26e.1	2.87	2.95	1.35	0.73	-1.48
ENSDARG00000075045	cxcl18b	2.12	2.74	8.21	10.17	1.92
ENSDARG00000075151	si:dkey-188i13.10	2.43	1.30	5.29	6.00	1.59
ENSDARG00000075444	cgref1	5.22	4.01	10.32	12.31	1.29
ENSDARG00000075622	zgc:174938	45.77	48.04	19.22	15.20	-1.45
ENSDARG00000075664	si:ch1073-429i10.1	0.57	1.00	2.53	2.34	1.64
ENSDARG00000075833	lyve1a	1.16	1.13	3.60	3.71	1.67
ENSDARG00000075931	acsl5	10.37	8.03	22.55	20.74	1.23
ENSDARG00000075958	si:dkey-266f7.9	2.20	1.08	4.57	7.86	1.92
ENSDARG00000076043	si:dkeyp-73d8.9	1.04	0.68	43.99	36.29	5.54
ENSDARG00000076137	CLDN22	0.81	0.48	6.34	2.38	2.74
ENSDARG00000076182	stat1b	0.87	0.47	6.55	4.90	3.09
ENSDARG00000076296	triqk	4.79	3.88	10.51	8.95	1.17
ENSDARG00000076388	zgc:194686	2.82	2.31	6.87	5.02	1.22
ENSDARG00000076448	serpinf2a	10.86	9.39	23.02	22.79	1.18
ENSDARG00000076483	zgc:198241	2.79	1.49	7.06	4.37	1.42
ENSDARG00000076541	clec3ba	4.16	8.17	2.62	2.76	-1.20
ENSDARG00000076572	crygm2d7	7.62	14.69	32.91	87.27	2.43
ENSDARG00000076693	crygm2d19	4.56	17.36	84.37	171.04	3.54
ENSDARG00000076710	si:dkey-42l23.7	3.30	2.42	1.12	0.23	-2.07
ENSDARG00000076790	crygm2d16	16.59	42.04	72.22	167.26	2.03
ENSDARG00000076820	xkr8.2	5.23	7.11	1.46	1.85	-1.89
ENSDARG00000076933	aldh1a3	1.51	1.20	3.33	2.85	1.19
ENSDARG00000077306	cutc	16.26	20.39	9.77	8.14	-1.03
ENSDARG00000077542	si:dkeyp-75b4.8	1.83	0.90	6.17	5.81	2.14
ENSDARG00000077637	mal2	10.17	10.21	4.54	1.91	-1.66
ENSDARG00000077691	slc13a5a	1.57	1.02	3.72	2.82	1.34
ENSDARG00000077847	olfm2a	6.67	6.64	13.10	15.02	1.08
ENSDARG00000077880	si:ch211-255i20.3	3.57	3.86	6.60	9.50	1.12
ENSDARG00000078006	WSCD1 (1 of 2)	1.04	1.12	2.07	2.33	1.03
ENSDARG00000078057	snx8b	2.22	1.89	4.83	5.49	1.32
ENSDARG00000078069	rrm2	0.45	0.35	18.98	9.60	5.16
ENSDARG00000078134	crygm2f	2.03	4.09	11.84	20.27	2.39
ENSDARG00000078280	nkx3-1	2.25	2.24	6.10	5.44	1.36
ENSDARG00000078423	zgc:194285	1.79	1.68	6.17	6.23	1.83
ENSDARG00000078522	si:ch211-80h18.1	10.53	9.14	27.94	27.18	1.49
ENSDARG00000078529	adgrb1b	1.48	1.48	4.27	2.98	1.29
ENSDARG00000078657	C22H1orf233	1.88	1.55	3.51	4.59	1.24
ENSDARG00000078757	A2ML1 (11 of 13)	9.31	10.57	25.74	44.46	1.82
ENSDARG00000078847	si:dkey-238o13.4	1.51	1.67	3.13	3.97	1.16
ENSDARG00000078935	ttll4	3.03	2.54	6.59	5.23	1.08
ENSDARG00000079080	mettl20	1.03	0.60	2.88	2.62	1.76
ENSDARG00000079089	fbxw8	2.71	2.08	6.72	4.32	1.20
ENSDARG00000079119	si:ch211-229d2.5	43.44	24.28	7.52	2.78	-2.72
ENSDARG00000079296	gcga	2.29	2.41	6.16	10.46	1.82
ENSDARG00000079302	and2	654.16	589.51	358.56	184.16	-1.20
ENSDARG00000079332	si:ch211-160d14.12	1.20	1.05	5.53	3.66	2.04
ENSDARG00000079347	zgc:194659	15.45	8.97	4.75	2.47	-1.76
ENSDARG00000079402	tapbp	1.77	1.80	4.62	3.64	1.21
ENSDARG00000079486	fam20a	1.59	1.19	5.83	3.41	1.73
ENSDARG00000079553	cd83	0.85	0.85	4.03	2.82	2.01
ENSDARG00000079932	zgc:152830	18.79	22.07	41.75	47.03	1.12
ENSDARG00000081280	AC024175.8	17.89	20.43	7.07	3.30	-1.88
ENSDARG00000086272	si:dkey-4p15.5	64.94	52.08	17.69	11.01	-2.03
ENSDARG00000086337	si:dkey-102g19.3	1.85	1.15	5.47	4.61	1.75
ENSDARG00000086374	isg15	2.60	1.11	6.32	5.81	1.71
ENSDARG00000086378	gig2q	0.08	0.19	8.92	6.37	5.76
ENSDARG00000086458	hdac10	1.90	1.99	9.48	7.64	2.14
ENSDARG00000086654	cbln11	2.14	1.59	4.16	4.87	1.28
ENSDARG00000086658	crygm2d21	4.44	10.28	41.14	131.10	3.55
ENSDARG00000086665	VGF	1.59	1.30	3.19	2.86	1.07
ENSDARG00000086724	im:7151449	2.68	3.01	6.64	7.11	1.28
ENSDARG00000086744	si:dkeyp-79b7.9	4.64	2.91	1.57	1.16	-1.47
ENSDARG00000086912	crygm2d18	12.99	29.94	88.35	195.31	2.72
ENSDARG00000086996	si:ch73-234b20.5	25.86	24.95	9.69	9.30	-1.42
ENSDARG00000087017	PTGR1 (2 of 2)	0.67	0.76	9.08	6.19	3.40
ENSDARG00000087046	si:ch211-222k6.2	3.68	3.25	2.00	1.44	-1.01
ENSDARG00000087059	fam213ab	1.00	1.33	3.81	2.30	1.38
ENSDARG00000087143	serpina7	10.29	13.85	26.02	30.65	1.23
ENSDARG00000087164	crygm2d4	2.07	5.95	21.80	42.99	3.01
ENSDARG00000087188	nfil3-6	4.16	1.51	25.78	15.63	2.87
ENSDARG00000087198	cthrc1a	3.79	4.64	13.04	11.76	1.56
ENSDARG00000087301	crygm2d14	5.50	15.61	90.61	164.99	3.60
ENSDARG00000087345	CABZ01059415.2	9.70	6.64	0.50	0.23	-4.50
ENSDARG00000087359	c3a.2	0.97	1.46	5.57	4.79	2.10
ENSDARG00000087403	si:ch211-214p13.3	3.43	3.14	9.83	6.29	1.29
ENSDARG00000087407	si:ch73-304f21.1	2.77	2.13	0.52	0.84	-1.85
ENSDARG00000087440	ponzr4	15.22	19.16	1.65	1.42	-3.49
ENSDARG00000087476	cbln20	17.79	20.41	7.72	5.10	-1.58
ENSDARG00000087764	ponzr10	1.45	0.71	4.03	3.66	1.83
ENSDARG00000087765	crygm2d10	13.76	34.37	90.91	224.84	2.71
ENSDARG00000087844	plekhn1	3.02	1.25	7.71	5.58	1.64
ENSDARG00000087873	si:ch211-170n20.3	26.84	27.05	15.18	6.74	-1.30
ENSDARG00000088040	MDP1	2.94	3.72	8.44	8.60	1.36
ENSDARG00000088062	PPHLN1 (2 of 2)	1.34	1.43	4.41	2.74	1.36
ENSDARG00000088079	tmed6	2.12	0.44	6.35	6.14	2.28
ENSDARG00000088251	si:ch211-24o10.6	0.55	0.48	5.08	4.35	3.18
ENSDARG00000088330	si:ch211-5k11.2	43.35	32.38	93.31	156.06	1.72
ENSDARG00000088366	zgc:77938	8.14	8.73	21.23	23.62	1.41
ENSDARG00000088444	sell	12.84	8.51	3.99	1.93	-1.85
ENSDARG00000088589	ponzr3	55.81	57.69	8.18	6.44	-2.96
ENSDARG00000088687	crygm2d17	12.71	40.90	125.20	256.47	2.83
ENSDARG00000088717	C6H2orf40 (2 of 2)	79.97	64.63	28.70	24.61	-1.44
ENSDARG00000088823	crygm2d3	2.34	5.74	21.57	54.87	3.24
ENSDARG00000088924	CENPU	1.09	1.48	3.35	2.41	1.16
ENSDARG00000089123	negaly6	28.50	23.54	13.53	9.81	-1.16
ENSDARG00000089217	ubap1la	2.87	3.94	0.98	1.23	-1.63
ENSDARG00000089429	si:dkey-205h13.2	390.25	222.43	80.58	44.37	-2.29
ENSDARG00000089475	hbae1	5.60	7.20	17.44	14.75	1.33
ENSDARG00000089517	zgc:92594	1.08	1.12	4.06	2.67	1.61
ENSDARG00000089837	slc35d2	6.33	3.87	2.15	0.54	-1.93
ENSDARG00000089838	si:dkey-262k9.4	3.29	4.15	9.84	9.02	1.34
ENSDARG00000090120	si:dkey-248g21.1	18.52	26.02	4.45	8.23	-1.81
ENSDARG00000090253	zgc:113223	7.42	9.58	3.81	3.57	-1.20
ENSDARG00000090268	krtt1c19e	7515.09	7712.95	2376.01	2434.02	-1.66
ENSDARG00000090352	si:dkey-97i18.5	13.70	12.97	38.44	27.11	1.30
ENSDARG00000090401	BCL2L14	2.49	2.83	6.44	5.38	1.15
ENSDARG00000090428	ctrb1	565.18	425.64	1293.59	2573.04	1.96
ENSDARG00000090690	nell2a	5.35	3.95	11.76	9.95	1.22
ENSDARG00000090707	CABZ01079981.1	10.16	7.78	4.85	0.52	-1.74
ENSDARG00000090722	C20H6orf58 (1 of 2)	53.42	57.22	104.44	190.91	1.42
ENSDARG00000090873	ccl34a.4	1.73	2.30	8.76	5.46	1.82
ENSDARG00000090889	LECT2 (2 of 2)	0.74	0.64	14.99	17.72	4.57
ENSDARG00000090943	CABZ01033205.2	4.59	4.99	9.94	10.63	1.10
ENSDARG00000090969	cbln18	27.91	18.24	2.65	1.32	-3.54
ENSDARG00000091101	fabp10b	7.93	10.19	4.36	4.60	-1.02
ENSDARG00000091148	crygm2d20	6.23	14.07	44.62	84.92	2.67
ENSDARG00000091234	CU019646.2	21.27	34.14	67.93	52.18	1.12
ENSDARG00000091235	CABZ01015525.1	9.10	2.29	0.05	0.15	-5.82
ENSDARG00000091280	si:ch211-66k16.27	3.94	2.87	12.19	9.14	1.64
ENSDARG00000091377	galn	1.75	2.84	6.26	9.34	1.77
ENSDARG00000091558	si:ch211-251f6.7	5.53	9.17	0.47	0.81	-3.52
ENSDARG00000091625	si:dkeyp-67f1.2	6.95	5.28	3.01	2.08	-1.27
ENSDARG00000091650	igflr1	3.69	2.48	1.24	0.64	-1.71
ENSDARG00000091669	si:dkey-17e16.17	68.46	87.42	36.90	24.88	-1.34
ENSDARG00000091730	gig2l	1.39	0.32	4.54	10.63	3.14
ENSDARG00000091754	CHCHD5	2.46	3.81	9.84	7.15	1.44
ENSDARG00000091800	si:ch211-186e20.6	2.53	2.96	5.09	9.69	1.43
ENSDARG00000091926	si:dkey-103e21.5	1.70	1.08	8.41	5.69	2.34
ENSDARG00000091961	pth1b	5.91	6.22	2.47	3.50	-1.02
ENSDARG00000091972	si:dkey-58f10.7	4.25	4.12	1.05	1.74	-1.58
ENSDARG00000091996	si:ch211-117m20.5	767.00	1107.60	420.63	459.10	-1.09
ENSDARG00000092044	si:dkey-22f5.9	5.20	4.46	2.95	1.71	-1.05
ENSDARG00000092045	si:dkey-225k4.1	1.82	1.72	4.60	3.12	1.12
ENSDARG00000092151	si:dkey-40i22.5	0.48	1.05	2.59	2.07	1.60
ENSDARG00000092191	si:dkey-238c7.13	13.94	5.31	191.74	495.27	5.16
ENSDARG00000092228	si:dkey-27p18.3	2.54	0.99	9.53	5.17	2.05
ENSDARG00000092283	cxl34b.11	179.17	246.62	87.49	88.81	-1.27
ENSDARG00000092358	si:ch211-114l13.11	0.42	0.00	16.71	14.92	6.23
ENSDARG00000092361	si:dkey-79f11.7	3.27	1.13	14.72	7.21	2.32
ENSDARG00000092379	si:dkeyp-51b9.3	7.93	7.13	48.90	46.26	2.66
ENSDARG00000092477	si:ch211-190k17.31	3.16	3.89	1.13	0.62	-2.00
ENSDARG00000092483	iqcc	1.60	1.50	4.98	2.51	1.27
ENSDARG00000092551	si:dkey-56e3.2	4.39	5.81	0.90	0.99	-2.42
ENSDARG00000092714	si:ch211-266a5.12	0.84	0.46	4.94	3.39	2.68
ENSDARG00000092726	si:dkey-184p9.7	23.71	21.22	8.82	3.68	-1.85
ENSDARG00000092809	hoxc9a	8.47	9.41	4.53	1.68	-1.52
ENSDARG00000092813	fndc7rs4	6.91	3.57	1.17	0.66	-2.51
ENSDARG00000092858	si:ch1073-126c3.2	3.91	2.47	7.33	8.64	1.32
ENSDARG00000092894	si:ch211-114l13.9	2.23	0.77	7.16	6.97	2.23
ENSDARG00000092898	si:dkey-105h11.2	1.16	0.83	4.02	4.71	2.14
ENSDARG00000092947	cyt1	5955.87	6494.17	728.38	1009.24	-2.84
ENSDARG00000092967	si:dkey-93m18.4	0.64	1.84	4.03	4.09	1.71
ENSDARG00000093006	zgc:154040	3.76	3.46	1.35	1.86	-1.17
ENSDARG00000093042	si:dkey-104n9.1	2.28	1.83	4.91	5.66	1.36
ENSDARG00000093044	si:ch211-161h7.5	9.83	4.35	18.10	21.06	1.47
ENSDARG00000093068	c3b.1	2.19	1.27	5.22	3.54	1.34
ENSDARG00000093248	si:dkey-238m4.4	0.46	0.50	2.71	2.60	2.47
ENSDARG00000093279	si:dkey-11o1.3	0.72	0.86	3.62	4.32	2.33
ENSDARG00000093318	si:dkey-57a22.15	16.83	31.92	75.55	117.94	1.99
ENSDARG00000093546	ms4a17a.2	1.46	1.39	6.57	3.61	1.83
ENSDARG00000093570	si:dkey-25o1.7	3.99	3.04	0.15	0.11	-4.75
ENSDARG00000093584	zgc:193505	369.02	578.79	195.02	172.66	-1.37
ENSDARG00000093619	sult3st2	5.39	4.69	12.06	15.99	1.48
ENSDARG00000093656	ZNF784 (4 of 6)	2.40	2.81	1.37	1.18	-1.03
ENSDARG00000093671	crp4	28.91	27.57	68.75	45.35	1.01
ENSDARG00000093843	si:dkey-21e2.7	0.05	0.21	5.01	2.46	4.83
ENSDARG00000093844	zgc:136461	217.10	120.97	350.11	484.89	1.30
ENSDARG00000093888	si:dkeyp-87e3.1	41.40	51.91	0.11	0.05	-9.17
ENSDARG00000093936	si:dkeyp-1h4.6	79.54	39.18	165.98	208.65	1.66
ENSDARG00000093998	si:ch73-7i4.2	6.78	15.20	2.58	2.83	-2.02
ENSDARG00000094041	krt17	4989.04	2703.11	1713.78	1312.24	-1.35
ENSDARG00000094104	si:ch211-213i16.3	6.14	1.63	38.77	96.14	4.12
ENSDARG00000094281	si:ch73-196i15.3	1.76	1.80	4.30	5.60	1.48
ENSDARG00000094310	si:ch211-255g12.6	13.56	59.89	287.22	572.30	3.55
ENSDARG00000094499	si:ch211-120f16.3	7.16	14.39	4.52	1.37	-1.87
ENSDARG00000094511	ccl20b	1.40	1.47	4.92	3.38	1.53
ENSDARG00000094681	hbl2	4.79	7.37	0.33	0.37	-4.11
ENSDARG00000094719	si:dkeyp-1h4.9	10.20	9.96	25.33	24.68	1.31
ENSDARG00000094809	ms4a17a.14	1.82	1.55	8.17	10.03	2.43
ENSDARG00000094821	si:ch73-44m9.2	7.40	6.76	1.78	1.23	-2.24
ENSDARG00000094854	ms4a17a.8	6.43	9.43	2.54	1.97	-1.82
ENSDARG00000094890	si:ch211-163b2.4	2.67	2.16	0.75	0.61	-1.83
ENSDARG00000094910	si:dkey-22i16.7	5.43	4.78	11.25	9.28	1.01
ENSDARG00000094937	si:dkey-31j12.2	8.76	5.05	0.13	0.00	-6.60
ENSDARG00000095046	pold2	2.49	2.63	7.10	5.05	1.25
ENSDARG00000095082	BX571811.1	6.99	3.29	0.66	0.68	-2.94
ENSDARG00000095126	si:dkey-82i20.2	2.00	1.56	4.21	4.24	1.24
ENSDARG00000095132	si:dkey-51d8.2	7.25	2.98	0.57	0.00	-4.19
ENSDARG00000095147	krt96	103.91	218.66	10.24	12.15	-3.85
ENSDARG00000095282	si:ch211-15o14.2	1.23	0.31	3.99	2.06	1.97
ENSDARG00000095384	si:dkey-78l4.2	1.40	1.15	4.06	4.74	1.79
ENSDARG00000095388	si:ch211-42i9.5	7.64	6.51	3.93	2.10	-1.23
ENSDARG00000095427	si:ch211-152p11.8	3.01	3.08	1.53	1.36	-1.08
ENSDARG00000095497	ZNF784 (6 of 6)	2.54	2.38	1.05	1.34	-1.04
ENSDARG00000095553	lenep	0.84	1.44	6.87	9.38	2.83
ENSDARG00000095556	si:dkey-238c7.12	316.76	418.37	1435.82	1635.36	2.06
ENSDARG00000095559	si:dkey-246j7.1	2.08	2.49	5.36	4.02	1.03
ENSDARG00000095584	si:ch211-218c6.9	9.99	10.75	5.39	4.51	-1.07
ENSDARG00000095615	si:dkeyp-86h10.3	39.76	21.64	11.22	7.30	-1.73
ENSDARG00000095643	si:dkey-253d23.3	8.37	7.75	3.10	2.08	-1.64
ENSDARG00000095649	si:dkey-97a13.12	1.88	1.13	6.29	5.03	1.92
ENSDARG00000095674	tmem123	1.19	1.64	4.20	5.28	1.74
ENSDARG00000095724	si:ch211-196c10.15	2.62	2.33	1.37	0.57	-1.35
ENSDARG00000095767	dio3b	2.94	2.18	9.70	11.99	2.08
ENSDARG00000095801	si:dkey-119g10.4	1.68	1.32	7.44	5.43	2.10
ENSDARG00000095802	C20H2orf71 (1 of 2)	1.90	1.29	4.35	4.26	1.43
ENSDARG00000095820	si:dkey-6n3.3	0.50	1.47	6.60	7.15	2.81
ENSDARG00000095830	serpinb1l1	2.25	0.82	4.67	4.37	1.56
ENSDARG00000095863	afp4	147.75	276.59	457.67	528.81	1.22
ENSDARG00000095908	SAT1 (3 of 3)	34.61	46.35	129.36	127.66	1.67
ENSDARG00000096242	si:ch211-76l23.4	35.57	43.36	20.94	14.65	-1.15
ENSDARG00000096304	btr31	2.10	1.86	4.66	5.40	1.34
ENSDARG00000096508	si:ch211-265g21.1	38.73	47.54	75.98	102.05	1.05
ENSDARG00000096548	si:dkey-6o1.2	7.15	5.36	3.52	1.03	-1.46
ENSDARG00000096568	si:dkey-19f21.8	0.79	0.95	2.15	2.20	1.32
ENSDARG00000096579	si:dkey-9c18.3	3.90	5.10	0.77	2.42	-1.50
ENSDARG00000096712	si:dkey-193p11.2	333.59	342.36	12.13	12.98	-4.75
ENSDARG00000096717	si:rp71-1c10.7	4.20	4.05	10.30	9.63	1.27
ENSDARG00000096721	si:rp71-1c10.11	268.05	348.53	109.89	99.98	-1.55
ENSDARG00000096786	PLEKHS1 (4 of 4)	10.31	9.86	6.16	3.22	-1.11
ENSDARG00000096818	zgc:136683	6.22	5.29	2.43	2.27	-1.29
ENSDARG00000096967	si:dkey-207j16.10	3.99	3.22	6.77	10.47	1.26
ENSDARG00000097032	si:ch211-256a21.4	2.70	3.61	1.36	0.45	-1.81
ENSDARG00000097110	si:dkey-56f14.4	1.96	1.52	5.60	7.25	1.88
ENSDARG00000097157	si:ch211-207n23.2	125.49	127.10	355.28	300.78	1.38
ENSDARG00000097166	si:ch211-232p21.7	2.22	3.25	0.00	0.03	-7.96
ENSDARG00000097247	si:dkey-19d21.2	6.17	5.84	1.17	1.56	-2.14
ENSDARG00000097269	si:ch211-222n22.1	2.70	4.09	0.29	0.41	-3.28
ENSDARG00000097368	si:dkey-244a7.1	3.71	7.18	1.78	1.32	-1.81
ENSDARG00000097453	si:ch211-225b7.5	8.14	7.42	1.53	0.90	-2.67
ENSDARG00000097503	si:ch73-288o11.5	25.16	61.85	16.29	15.72	-1.44
ENSDARG00000097513	si:ch211-84k18.3	3.98	7.15	18.74	25.81	2.00
ENSDARG00000097583	arfgap3	12.74	9.75	5.69	4.22	-1.18
ENSDARG00000097725	si:dkey-96g2.1	6.06	6.58	11.77	15.54	1.11
ENSDARG00000097728	si:dkey-23a23.3	0.08	0.09	2.81	2.49	5.03
ENSDARG00000097746	si:rp71-77l1.1	19.22	25.84	65.67	50.87	1.37
ENSDARG00000097789	zgc:174637	18.93	19.85	7.25	10.83	-1.10
ENSDARG00000097938	ASB5 (2 of 2)	3.28	3.58	0.83	1.31	-1.68
ENSDARG00000097959	si:dkey-248g15.3	1254.55	2139.80	198.13	232.54	-2.98
ENSDARG00000098058	im:7150988	400.73	577.00	180.23	185.83	-1.42
ENSDARG00000098104	CABZ01080371.1	1.80	1.81	5.88	7.07	1.84
ENSDARG00000098162	zgc:77748	8.67	10.58	17.93	22.99	1.09
ENSDARG00000098213	si:ch211-59m15.1	2.55	2.91	0.32	0.21	-3.33
ENSDARG00000098222	ccbl2	6.46	3.51	0.00	0.11	-6.35
ENSDARG00000098239	zgc:85932	43.68	25.80	16.23	11.64	-1.32
ENSDARG00000098297	CABZ01101812.1	7.16	5.97	15.45	13.13	1.12
ENSDARG00000098315	cyp1a	6.21	4.48	34.58	12.34	2.13
ENSDARG00000098376	si:ch211-207l14.1	5.23	3.67	9.46	8.55	1.02
ENSDARG00000098377	tnfrsf11b	1.06	0.69	2.45	2.74	1.56
ENSDARG00000098475	arr3b	20.98	16.60	42.69	49.15	1.29
ENSDARG00000098586	zgc:194887	1.70	1.05	3.74	3.04	1.30
ENSDARG00000098591	tubb4b	102.98	112.75	303.44	228.11	1.30
ENSDARG00000098700	il1b	0.71	0.44	9.95	5.81	3.79
ENSDARG00000098718	si:dkey-53k12.37	0.89	0.40	2.65	2.27	1.92
ENSDARG00000098800	si:dkey-15h8.11	19.33	24.89	0.00	0.00	-14.43
ENSDARG00000098803	cyp2aa8	6.36	6.46	17.11	29.10	1.85
ENSDARG00000098990	CABZ01102528.1	5.17	4.41	9.97	9.80	1.05
ENSDARG00000098997	BX001050.1	0.64	0.53	5.64	2.42	2.79
ENSDARG00000099024	MSLNL (2 of 4)	11.22	7.71	4.93	2.73	-1.30
ENSDARG00000099056	ACAA2 (2 of 2)	11.95	18.93	1.48	0.13	-4.27
ENSDARG00000099091	si:ch73-158n7.2	9.80	6.18	3.96	2.06	-1.41
ENSDARG00000099115	FO904953.1	3.65	2.47	8.78	6.75	1.34
ENSDARG00000099154	CABZ01032488.1	2.22	14.07	38.83	51.82	2.48
ENSDARG00000099185	chia.2	175.73	106.62	323.51	350.79	1.26
ENSDARG00000099200	zgc:123103	192.26	274.78	433.70	583.14	1.12
ENSDARG00000099222	PRPSAP1	4.84	3.72	13.85	11.43	1.56
ENSDARG00000099306	FBXO2	316.51	359.78	93.86	65.51	-2.09
ENSDARG00000099351	igfbp1a	21.43	31.62	105.54	83.16	1.83
ENSDARG00000099382	si:ch211-209n20.1	0.84	0.64	5.96	3.22	2.63
ENSDARG00000099401	ccl33.3	8.56	9.15	25.12	36.83	1.81
ENSDARG00000099406	lrit1b	6.04	4.73	13.00	11.58	1.19
ENSDARG00000099416	si:ch211-134a4.2	5.24	2.97	0.04	0.03	-6.65
ENSDARG00000099419	ME1 (2 of 2)	0.00	0.00	13.81	19.34	14.02
ENSDARG00000099425	CFI	6.36	8.57	14.12	15.96	1.01
ENSDARG00000099481	ttc8	1.39	1.55	4.39	2.74	1.28
ENSDARG00000099534	CABZ01066926.1	1.60	1.19	4.00	2.90	1.30
ENSDARG00000099689	si:dkey-203a12.3	1.21	0.47	2.91	3.01	1.82
ENSDARG00000099752	si:dkey-19b23.7	1.70	1.56	3.80	4.62	1.37
ENSDARG00000099838	CABZ01113374.1	2.00	0.69	4.14	3.63	1.53
ENSDARG00000099876	si:dkey-53f14.5	4.99	11.21	2.94	3.20	-1.40
ENSDARG00000099899	si:dkeyp-51g9.4	3.26	2.76	0.30	0.12	-3.83
ENSDARG00000099960	elovl1a	8.65	12.42	23.99	24.26	1.19
ENSDARG00000099969	zgc:152863	1.91	1.61	4.17	3.11	1.05
ENSDARG00000100021	hrasls	0.21	0.47	5.73	8.22	4.36
ENSDARG00000100028	POLE2	2.48	2.41	6.93	6.15	1.42
ENSDARG00000100095	anxa1b	166.46	219.50	56.17	20.99	-2.32
ENSDARG00000100240	si:dkey-193i10.3	4.36	3.18	0.86	0.45	-2.51
ENSDARG00000100246	si:ch73-264i18.3	10.48	6.97	4.22	3.13	-1.25
ENSDARG00000100284	CABZ01080372.1	1.80	1.40	3.79	3.09	1.10
ENSDARG00000100484	CR450808.1	1.09	2.52	9.05	12.89	2.60
ENSDARG00000100504	ppp1r27b	7.02	3.46	1.82	1.49	-1.67
ENSDARG00000100555	aqp11	3.03	3.01	7.03	5.55	1.06
ENSDARG00000100603	CABZ01095512.1	8.79	10.39	21.78	28.53	1.39
ENSDARG00000100625	si:ch73-197b13.1	0.43	0.05	5.76	2.67	4.13
ENSDARG00000100635	chia.1	38.21	19.43	62.51	79.36	1.30
ENSDARG00000100747	GUCA1A (1 of 2)	2.73	0.82	15.51	6.39	2.63
ENSDARG00000100818	CCBL2 (2 of 5)	0.21	0.24	6.00	5.37	4.69
ENSDARG00000100832	CABZ01009451.1	1.28	1.22	6.04	2.57	1.78
ENSDARG00000100900	si:ch211-183d5.2	1.61	1.20	9.33	12.09	2.93
ENSDARG00000100942	zgc:194655	2.46	1.88	7.36	8.05	1.83
ENSDARG00000100946	CR352328.4	5.68	5.43	1.68	1.72	-1.71
ENSDARG00000101040	ccl20a.3	1.80	1.22	4.87	3.69	1.50
ENSDARG00000101101	si:ch73-367j5.2	1.91	0.90	3.81	10.39	2.33
ENSDARG00000101135	si:dkey-85k7.7	13.35	10.71	25.67	24.32	1.06
ENSDARG00000101160	apoa4a	3.93	5.50	12.07	11.44	1.32
ENSDARG00000101170	rab42b	13.80	11.86	7.56	4.10	-1.14
ENSDARG00000101180	mcm7	9.03	8.73	23.73	18.10	1.24
ENSDARG00000101200	zgc:112964	10.78	9.66	3.91	6.17	-1.02
ENSDARG00000101254	si:ch211-157e21.22	2.33	2.04	5.32	4.71	1.20
ENSDARG00000101320	si:dkey-50i6.5	1.30	1.26	3.14	2.34	1.10
ENSDARG00000101407	tgm1l4	10.20	9.03	1.03	0.98	-3.26
ENSDARG00000101465	orc2	1.69	1.64	4.22	3.27	1.17
ENSDARG00000101473	si:ch211-25g7.5	0.00	0.00	74.99	104.85	16.46
ENSDARG00000101479	BX908782.3	2.93	3.05	18.87	10.28	2.28
ENSDARG00000101484	si:dkey-264f17.2	0.19	0.00	5.52	2.52	5.32
ENSDARG00000101499	ccl39.3	3.99	6.39	0.96	0.51	-2.83
ENSDARG00000101616	ARFGAP1	13.96	10.56	30.30	22.48	1.11
ENSDARG00000101628	ascl1b	15.78	13.49	8.20	5.41	-1.11
ENSDARG00000101662	EEF1D (2 of 3)	0.15	0.07	2.62	4.43	4.99
ENSDARG00000101719	pargl	3.28	1.71	5.17	5.01	1.03
ENSDARG00000101757	si:dkey-27n6.4	0.22	0.02	12.11	5.48	6.18
ENSDARG00000101785	LAPTM5	7.19	5.41	12.81	16.03	1.19
ENSDARG00000101791	ccbl2	0.16	0.00	16.63	13.62	7.54
ENSDARG00000101956	CU571315.2	2.56	2.55	0.85	0.53	-1.88
ENSDARG00000101979	EPS8L3 (2 of 2)	4.50	4.61	9.22	10.28	1.10
ENSDARG00000102004	apoea	211.40	333.74	521.54	615.83	1.06
ENSDARG00000102059	si:ch211-117l17.6	22.97	26.92	6.90	13.98	-1.26
ENSDARG00000102074	CR388416.1	2.15	2.47	1.14	1.10	-1.04
ENSDARG00000102102	BX649453.2	3.91	2.18	1.07	0.40	-2.04
ENSDARG00000102176	pla1a	2.14	2.13	7.77	3.99	1.46
ENSDARG00000102207	CABZ01102578.1	1.96	2.32	4.82	4.01	1.05
ENSDARG00000102299	il8l1	2.69	3.03	29.08	62.64	4.00
ENSDARG00000102389	ved	2.81	3.08	1.14	1.16	-1.36
ENSDARG00000102414	wu:fd14a01	30.35	31.81	81.58	48.45	1.06
ENSDARG00000102423	CCBL2 (5 of 5)	3.67	3.64	2.14	0.76	-1.34
ENSDARG00000102476	CABZ01091853.1	12.06	12.39	26.17	26.08	1.09
ENSDARG00000102548	si:ch211-127b16.4	0.64	0.31	5.71	4.62	3.46
ENSDARG00000102558	pde6h	324.12	233.64	1288.25	1582.82	2.36
ENSDARG00000102594	zgc:194627	1.19	1.23	6.13	2.55	1.84
ENSDARG00000102650	si:ch211-236d3.3	1.05	1.06	2.65	2.04	1.14
ENSDARG00000102733	EMC4 (2 of 2)	0.00	0.00	90.57	98.70	16.53
ENSDARG00000102776	cxcl19	2.49	0.79	4.78	4.09	1.44
ENSDARG00000102790	PNPT1	9.20	9.49	25.71	24.04	1.41
ENSDARG00000102798	mcm2	6.01	5.76	17.44	10.05	1.23
ENSDARG00000102805	cyp2aa12	3.67	2.51	9.47	7.07	1.42
ENSDARG00000102888	gpr39	3.55	3.92	9.23	6.45	1.07
ENSDARG00000102929	C7H19orf12 (2 of 4)	5.80	6.93	19.63	17.01	1.52
ENSDARG00000102945	ccl39.2	0.00	0.45	2.65	3.21	3.67
ENSDARG00000102983	EMC7 (2 of 2)	2.27	3.09	6.37	4.86	1.07
ENSDARG00000103025	hmgcs1	4.35	4.28	12.28	7.55	1.20
ENSDARG00000103034	CRISP3	13.98	20.03	47.37	45.13	1.44
ENSDARG00000103199	si:dkey-247k7.2	196.36	125.70	401.60	407.02	1.33
ENSDARG00000103277	cyp24a1	3.53	3.12	20.29	28.44	2.87
ENSDARG00000103295	cyp3a65	83.55	57.02	218.68	194.44	1.56
ENSDARG00000103403	sar1b	21.32	17.84	47.29	39.67	1.15
ENSDARG00000103466	ccl35.1	0.16	1.58	2.90	3.64	1.91
ENSDARG00000103503	dgat1a	3.26	2.41	6.53	6.32	1.18
ENSDARG00000103574	CABZ01109058.1	1.44	1.33	6.17	2.60	1.66
ENSDARG00000103591	dkk3a	3.10	3.39	7.44	7.35	1.18
ENSDARG00000103659	bco1l	2.94	2.50	6.76	6.06	1.24
ENSDARG00000103666	dapk2b	5.87	4.54	2.58	2.03	-1.18
ENSDARG00000103682	si:dkey-23i12.5	30.25	24.04	12.48	11.89	-1.15
ENSDARG00000103688	TANK (2 of 2)	1.45	1.02	4.36	2.22	1.42
ENSDARG00000103755	si:dkeyp-4c4.1	16.59	5.74	2.94	0.90	-2.54
ENSDARG00000103759	fahd2a	8.20	7.63	18.36	15.08	1.08
ENSDARG00000103762	rln1	0.41	2.13	3.29	3.33	1.38
ENSDARG00000103766	cyp2aa7	1.55	1.04	6.96	6.02	2.33
ENSDARG00000103775	THBS1 (2 of 2)	3.27	3.17	8.70	9.60	1.51
ENSDARG00000103826	gpib	46.03	47.96	11.88	16.48	-1.73
ENSDARG00000103859	KRTCAP2 (2 of 2)	16.81	31.88	4.39	5.40	-2.32
ENSDARG00000103947	si:dkey-111k8.1	2.63	2.49	1.14	0.39	-1.73
ENSDARG00000103981	bhlha9	17.72	11.39	2.95	1.50	-2.71
ENSDARG00000104008	si:ch211-232d10.3	6.77	6.32	0.42	0.14	-4.54
ENSDARG00000104028	si:dkey-74k8.3	31.70	44.61	18.35	17.45	-1.09
ENSDARG00000104133	5S_rRNA	9.70	15.73	79.84	62.97	2.49
ENSDARG00000104154	si:ch211-12c3.3	2.07	4.23	1.07	0.73	-1.81
ENSDARG00000104261	CABZ01111729.1	1.05	0.15	8.44	4.21	3.39
ENSDARG00000104301	zgc:193726	18.52	39.91	7.46	7.65	-1.95
ENSDARG00000104329	si:ch73-281k2.5	1.20	2.20	12.03	12.35	2.84
ENSDARG00000104399	CABZ01064972.2	6.42	3.12	17.27	17.27	1.86
ENSDARG00000104582	C21H5orf24 (2 of 2)	1.95	1.60	4.33	4.19	1.27
ENSDARG00000104642	si:dkey-201i2.1	23.18	21.11	11.69	3.62	-1.53
ENSDARG00000104659	WARS (2 of 2)	7.06	6.27	14.80	12.99	1.06
ENSDARG00000104687	slc16a9b	2.12	1.37	6.39	4.10	1.58
ENSDARG00000104698	si:ch211-69i3.3	0.52	0.91	4.17	4.08	2.51
ENSDARG00000104752	COLEC10	4.73	4.54	2.31	1.70	-1.21
ENSDARG00000104788	CLEC3A	1.97	1.41	4.19	4.20	1.31
ENSDARG00000104839	mansc1	4.79	3.84	9.59	8.86	1.10
ENSDARG00000104877	FO904831.2	0.88	0.41	2.97	2.42	2.05
ENSDARG00000105052	cfhl5	2.92	3.15	12.72	14.50	2.16
ENSDARG00000105053	DBX2	3.62	3.60	1.78	1.76	-1.03
ENSDARG00000105061	si:ch73-261i21.5	5.09	3.88	2.10	1.13	-1.48
ENSDARG00000105089	ccl39.6	0.84	1.34	5.93	5.22	2.35
ENSDARG00000105122	si:dkeyp-7b3.1	6.38	6.39	1.79	2.27	-1.65
ENSDARG00000105193	si:dkey-18f7.2	3.18	2.74	1.44	1.36	-1.08
ENSDARG00000105204	si:ch1073-219h3.1	5.53	3.00	1.17	0.64	-2.23
ENSDARG00000105212	cfhl1	1.28	0.62	3.12	3.01	1.69
