# Supplementary material for: Evolutionary recruitment of flexible Esrp-dependent splicing programs into diverse embryonic morphogenetic processes
Source: Springer Nature journal article supplement (doi:10.1038/s41467-017-01961-y), 2017-11-21
Supplement: MOESM7 [file 41467_2017_1961_MOESM7_ESM.xlsx]

## Sheet: TableS2
Suplementary Table 2. Differentially expressed genes in sea urchin (WT vs ESRP KD)
Gene_ID	Gene_name	Embr_24h_Esrp_Cont_e (cRPKM)	Embr_24h_Esrp_Cont_f (cRPKM)	Embr_24h_Esrp_KD_e (cRPKM)	Embr_24h_Esrp_KD_f (cRPKM)	Log2_Fold_Ch
WHL22.101	Glra1_1=GLRA2	4.09	4.13	6.48	6.18	0.62
WHL22.101075	SPU_018689=LRP4	13.97	19.02	8.33	12.98	-0.65
WHL22.101088		6.63	11.86	5.05	6.43	-0.64
WHL22.101274	Med10=MED10	30.01	33.75	47.75	51.21	0.64
WHL22.10197	B3gt1=B3GALT1	6.36	8.66	19.11	20.86	1.43
WHL22.102226	C3orf37L=C3orf37	15.79	28.07	43.25	41.18	1.00
WHL22.1024	Svep1L_8=SVEP1	1.72	12.02	8.80	15.34	1.35
WHL22.103680	Dus2l=DUS2L	10.85	20.03	20.31	25.72	0.63
WHL22.104163	ClvhH2a=HIST1H2AE	64.40	210.55	289.53	280.86	1.29
WHL22.104633	Madp1=ZCRB1	4.76	2.67	3.21	1.66	-0.63
WHL22.105014	Asah2_1=ASAH2	6.18	2.88	8.60	4.77	0.60
WHL22.105068	Cyp2L40=CYP2J2	3.42	10.75	6.47	14.26	0.67
WHL22.105895	Odf2=ODF2	20.31	34.72	40.01	45.53	0.69
WHL22.105928	Hypp_1217=C17orf74	3.36	5.13	5.80	13.12	1.07
WHL22.105934	Hypp_1217=FOXP2	3.00	6.10	8.43	14.19	1.35
WHL22.10716	Kiaa1109L=KIAA1109	2.84	2.17	1.75	1.12	-0.82
WHL22.107391		5.50	6.33	14.41	12.77	1.20
WHL22.107394	NA=UXT	10.30	7.62	19.34	19.08	1.11
WHL22.109107	ElavL=ELAVL2	486.62	590.94	850.65	927.37	0.73
WHL22.11012	Wwc1=WWC2	24.59	18.86	18.49	11.01	-0.59
WHL22.112289	Rev3_1=REV3L	2.24	2.47	1.33	1.44	-0.77
WHL22.112583	Snap25=FAM9A	5.58	9.05	1.40	3.72	-1.64
WHL22.112743	SPU_011431=OR10H2	1.05	5.15	7.52	7.06	1.65
WHL22.112993	Hypp_1760=TPRXL	14.76	13.74	10.07	8.89	-0.59
WHL22.113797	Agl=AGL	14.14	14.90	10.67	6.97	-0.76
WHL22.113803	Agl=AGL	12.83	13.18	8.94	7.75	-0.65
WHL22.114536	NA=KRTAP16-1	26.24	27.70	53.49	39.19	0.77
WHL22.114846	DmrtA2=DMRTA2	1.11	1.23	2.20	2.59	1.03
WHL22.115045	Rasa3=RASA3	10.28	8.67	7.40	5.25	-0.59
WHL22.119171	A1cfL=A1CF	27.88	5.27	7.20	3.48	-1.27
WHL22.119385	SPU_015227=DIAPH2	0.95	1.79	2.96	4.99	1.56
WHL22.121654	Six3=SIX6	68.86	34.00	35.43	22.76	-0.77
WHL22.123232	Adcy5_2=ADCY5	2.60	5.38	2.09	2.70	-0.65
WHL22.123421	NA=ZNF259	7.58	21.67	9.51	96.51	1.24
WHL22.123543	SPU_007823=ZNHIT2	6.89	6.86	12.58	8.75	0.61
WHL22.124698	SPU_017496=MEGF6	4.79	28.32	34.71	46.32	1.78
WHL22.124991	NA=CITED2	96.87	155.45	269.01	305.91	1.23
WHL22.126323	Clcn6=CLCN6	4.08	4.27	2.64	1.57	-1.03
WHL22.127418	NA=TBX3	32.63	76.64	61.91	113.15	0.74
WHL22.128637	Lrr/Fn3f=SGSM3	32.55	22.90	19.54	16.51	-0.60
WHL22.129653		3.55	4.92	8.19	6.56	0.81
WHL22.129998	Vwd/Vwc/Ldla=MUC2	1.71	0.84	3.57	2.09	1.19
WHL22.130796	SPU_013332=C1orf95	18.09	8.08	39.54	13.01	0.91
WHL22.130805	NA=SLC18A1	1.68	4.03	5.27	7.68	1.29
WHL22.131957	Ppglcp=HES4	16.98	36.71	78.86	73.60	1.61
WHL22.13209	NA=FILIP1L	12.78	26.70	29.25	50.53	1.05
WHL22.132809	Fignl1=FIGNL1	3.03	3.00	4.62	5.21	0.71
WHL22.133476	SPU_020218=HNMT	2.12	2.45	2.86	4.26	0.61
WHL22.133509	SPU_023645=GRB2	3.86	4.20	2.17	2.95	-0.67
WHL22.13682	NA=SMYD2	5.34	5.03	7.97	7.64	0.59
WHL22.13711	Tyki=CMPK2	22.48	21.03	51.73	46.36	1.17
WHL22.139325	Ig/Egf/Vwc=TNC	5.79	3.78	3.35	2.88	-0.59
WHL22.139403	NA=TNC	6.26	3.29	3.35	2.06	-0.79
WHL22.139437	NA=ODZ2	5.63	3.84	2.13	2.18	-1.11
WHL22.139443	NA=TNC	4.80	2.18	1.89	1.20	-1.10
WHL22.139446	NA=TNC	4.80	2.53	1.95	1.61	-0.98
WHL22.139816	Bicc1=BICC1	23.92	13.63	12.49	5.11	-1.18
WHL22.139825	Bicc1=BICC1	22.96	11.15	12.43	5.61	-0.94
WHL22.140607	Lrr1_1=LRRC15	9.09	7.98	5.24	4.76	-0.77
WHL22.140613	Lrr1_1=SLITRK5	7.21	8.18	5.72	3.63	-0.75
WHL22.140715	NA=USP34	7.20	7.04	4.58	3.66	-0.79
WHL22.140797	NA=FURIN	11.22	10.74	5.30	6.62	-0.89
WHL22.141618	SPU_025347=IFI27	9.97	25.36	59.88	71.47	2.04
WHL22.141951	Frem1L=FREM2	1573.05	1007.83	816.00	653.32	-0.79
WHL22.142086	Frem1L=FREM2	1709.59	1218.83	1024.59	881.04	-0.60
WHL22.142273	Sfk3=SRC	16.00	26.22	26.96	35.22	0.59
WHL22.143533	SPU_024403=C17orf106	3.22	4.73	6.83	6.25	0.74
WHL22.143620	Bloc1S1=BLOC1S1	24.24	23.60	34.58	39.30	0.62
WHL22.143739	Hypp_1095=HCN4	7.74	17.87	24.52	21.57	0.97
WHL22.144559	NA=RPGR	8.66	13.13	14.22	18.06	0.59
WHL22.145103	SPU_016349=CD151	39.06	53.93	77.71	81.91	0.79
WHL22.145164	Tob=TOB1	4.81	14.78	14.09	20.91	1.02
WHL22.145918	B3gtl=B3GALTL	25.08	27.44	39.38	40.90	0.61
WHL22.146031	Sfrp1/5=SFRP5	38.13	22.80	16.51	10.80	-1.15
WHL22.146120	SPU_028886=EPN2	17.68	7.32	9.41	4.76	-0.77
WHL22.146261		40.00	43.25	21.45	29.77	-0.72
WHL22.146438	Bbox1=BBOX1	4.51	2.58	6.28	5.19	0.74
WHL22.146777	NA=FOXP2	5.59	6.37	3.17	4.20	-0.71
WHL22.147938	SPU_011704=PARG	9.90	9.40	13.89	15.72	0.61
WHL22.147956	SPU_022954=CRIM1	69.09	92.97	184.51	190.25	1.23
WHL22.147969	Z76=ZNF658B	1.52	3.53	4.26	4.82	0.97
WHL22.148153	H6pd=H6PD	3.73	7.49	7.39	9.87	0.70
WHL22.148159	H6pd=H6PD	3.39	5.05	6.01	8.22	0.76
WHL22.148161	SPU_026805=ISOC1	12.66	14.62	28.53	23.06	0.92
WHL22.148320	Cycs_1=CYCS	332.84	220.22	480.79	406.39	0.71
WHL22.148927	Gcnt2=GCNT2	3.02	3.83	6.95	6.92	1.02
WHL22.149379	Trpt1=TRPT1	6.72	2.75	10.87	6.29	0.94
WHL22.149409	Med7=MED7	23.77	44.40	58.10	61.04	0.88
WHL22.150302	NA=MYO5C	18.56	23.17	13.56	11.46	-0.73
WHL22.150808		6.73	4.47	8.82	8.13	0.62
WHL22.151151		2.71	12.44	6.98	17.83	0.94
WHL22.15223	Smarca3=HLTF	27.80	21.26	41.56	35.10	0.65
WHL22.153705	Cpa2L_3=CPA2	1.72	6.09	6.38	8.50	1.19
WHL22.153756	Ccdc97=CCDC97	8.44	10.27	15.75	13.50	0.65
WHL22.155120	Egfi_7_1=NOTCH2	14.65	14.00	22.96	22.41	0.67
WHL22.155683	Pi3kcIII=PIK3C3	7.12	9.52	5.09	5.87	-0.59
WHL22.155730	Dgcr6ll_1=DGCR6L	20.39	33.57	35.09	50.69	0.69
WHL22.155770	SPU_008401=PXDN	3.35	5.71	12.66	13.33	1.57
WHL22.155773	Hdpx3=PXDN	2.91	6.32	9.56	11.83	1.31
WHL22.156472	Ftp/Gal_lec=LPHN1	1.79	4.84	3.47	6.51	0.69
WHL22.156546	HnmtL_1=HNMT	10.75	23.30	26.29	31.65	0.86
WHL22.158456		18.53	11.04	34.20	24.88	1.02
WHL22.158880	Hypp_632=NPHP3	3.02	4.42	5.32	6.07	0.64
WHL22.159051	Pkc1_1=PRKCA	14.03	9.44	8.24	5.87	-0.73
WHL22.160026	Spsb3=SPSB3	78.42	75.23	51.44	46.17	-0.66
WHL22.160395	SPU_005821=RPGR	13.13	8.25	7.33	5.51	-0.71
WHL22.16080	Atf4L=ATF5	206.22	232.42	488.89	530.07	1.22
WHL22.162377	Tk12=MUC17	42.61	28.28	25.22	19.90	-0.64
WHL22.162393	Hypp_69=NOTCH1	20.26	11.20	7.83	5.34	-1.22
WHL22.162939	Ada_1=ADA	23.46	39.33	54.89	53.45	0.83
WHL22.164280	SPU_017597=INTS12	7.75	4.56	12.53	6.94	0.65
WHL22.164635	NA=SOSTDC1	11.68	13.74	7.74	8.87	-0.61
WHL22.164664	Cyp3L1=CYP3A4	1.98	8.85	9.13	11.39	1.28
WHL22.165239	NA=WDR82	67.86	47.60	84.97	90.83	0.62
WHL22.166465	NA=NYNRIN	154.70	246.94	326.22	327.87	0.74
WHL22.166889	Hypp_1244=ANKRD30A	12.82	8.38	15.63	16.30	0.62
WHL22.169282	Dak_1=DAK	3.37	4.45	6.17	5.80	0.62
WHL22.169339	SPU_001013=ATG16L2	13.26	4.88	6.14	3.96	-0.71
WHL22.17034	TrafA=TRAF6	3.34	6.46	31.57	7.80	1.76
WHL22.17057		12.32	14.86	64.14	27.80	1.64
WHL22.17059		12.70	34.28	36.30	41.25	0.90
WHL22.170727	NA=HUWE1	201.10	208.48	135.91	97.58	-0.83
WHL22.171325		16.36	24.37	50.92	47.65	1.31
WHL22.171656		23.57	16.73	13.39	9.93	-0.78
WHL22.177463	Dmd=MAFA	43.76	49.36	30.12	31.34	-0.60
WHL22.178562	SPU_019107=TOX3	200.70	238.27	142.32	147.45	-0.59
WHL22.179138	NA=PHLDA1	4.37	6.87	8.59	9.32	0.70
WHL22.179280	Myo18a=MYO18A	14.52	18.86	10.79	10.98	-0.60
WHL22.181114	Rdh11_5=DHRS12	7.14	12.24	13.72	16.43	0.68
WHL22.181210		20.75	60.98	14.18	38.32	-0.61
WHL22.182055	SPU_009326=ANK3	4.14	5.65	7.66	7.82	0.68
WHL22.182089	SPU_019604=GRINL1A	5.76	5.79	9.71	8.29	0.64
WHL22.184143		15.07	16.55	36.31	43.28	1.33
WHL22.184147	C6orf84L=KIAA1009	11.04	14.98	19.83	21.00	0.67
WHL22.184159	C6orf84L=KIAA1009	9.14	10.15	13.11	19.36	0.73
WHL22.186248	Slc28a2=SLC28A1	4.78	3.38	7.56	5.41	0.67
WHL22.188090	SPU_021663=GSTT1	4.28	2.57	7.82	3.62	0.68
WHL22.188306	B3galt1_7=B3GALT1	19.72	35.00	39.95	51.14	0.79
WHL22.19105	SPU_025419=C12orf12	3.46	4.49	11.26	9.38	1.38
WHL22.19119	Rufy3=RUFY2	3.70	2.62	1.74	1.73	-0.84
WHL22.191360	NA=WDR76	4.34	5.15	6.97	8.00	0.66
WHL22.191730	Klhl2_2=KLHL8	9.06	17.62	23.12	32.76	1.12
WHL22.192065	SPU_004192=GPCPD1	4.60	10.23	7.93	15.48	0.70
WHL22.192209	Hyalin15=NOTCH1	488.12	271.33	272.31	164.53	-0.78
WHL22.193379		22.80	21.22	13.68	10.50	-0.88
WHL22.193534	SPU_026637=PRSS12	8.25	10.11	5.22	5.77	-0.74
WHL22.193651	NA=SPTB	5.18	15.22	21.17	22.03	1.28
WHL22.19877	SPU_013259=MED25	8.72	9.35	4.51	6.00	-0.79
WHL22.199140	Rdh8L_1=RDH8	0.95	1.40	3.29	2.49	1.31
WHL22.199994	SPU_022231=C15orf43	1.56	2.14	4.93	4.08	1.30
WHL22.201271	P4ha1_1=NCOA1	56.16	31.91	71.37	64.42	0.68
WHL22.203665	SPU_024821=ZFAND1	2.79	2.73	5.50	4.01	0.77
WHL22.203678	SPU_008739=NIPSNAP3A	39.06	43.69	73.06	73.91	0.83
WHL22.205854	Crim1=CRIM1	9.85	3.61	5.24	3.00	-0.59
WHL22.206347	NA=GABRB2	1.08	6.84	2.83	10.84	1.03
WHL22.208092	Arfl6=ARF1	9.70	9.86	6.87	4.54	-0.81
WHL22.208145	NA=EML6	5.84	5.94	11.11	9.25	0.79
WHL22.208154	NA=MED12	13.37	7.52	6.01	5.98	-0.74
WHL22.208335	C1qL_8=EMILIN2	7.69	37.55	44.38	65.64	1.67
WHL22.209052	NA=SP2	2.21	11.26	19.26	17.97	1.90
WHL22.210681	Hypp_567=TRIM36	0.76	2.00	5.63	3.44	1.83
WHL22.212068	SPU_026196=TPRXL	14.50	14.05	42.46	30.96	1.35
WHL22.21219	NA=RNF24	10.45	8.91	14.81	16.26	0.69
WHL22.212195	Kiaa0100L_1=KIAA0100	10.46	9.21	6.62	6.00	-0.64
WHL22.21242	SPU_028043=SLC5A12	17.60	2.03	29.95	4.35	0.94
WHL22.213433	SPU_021531=PCGF6	4.13	6.71	14.44	9.25	1.14
WHL22.213534	5ht7=HTR7	15.51	7.74	5.30	5.37	-1.04
WHL22.21483	LhH1a=HIST1H1A	5.69	4.74	20.96	13.04	1.67
WHL22.215205	Radil=RADIL	9.16	6.28	5.62	4.01	-0.68
WHL22.215259	Radil=MPRIP	36.22	33.01	27.60	18.70	-0.60
WHL22.215319	NA=XIAP	10.00	35.58	15.05	64.44	0.72
WHL22.215389	Ars=ARSA	36.42	54.49	53.00	91.70	0.65
WHL22.215442	Cep63L=MYH14	4.81	13.27	11.82	18.00	0.87
WHL22.215787	NA=HDAC11	3.88	8.04	7.52	11.31	0.72
WHL22.218454	Ddx59_1=DDX59	3.13	3.23	4.40	5.42	0.62
WHL22.218459	AgrnL=WSCD1	6.31	7.81	14.36	12.67	0.94
WHL22.219139	Kcnk18L_1=KCNK10	33.27	27.73	46.60	81.81	1.02
WHL22.219142	Kcnk18=SH2B2	16.88	15.73	25.28	42.04	1.00
WHL22.219486	Paqr8=PAQR7	10.89	11.69	7.44	6.38	-0.71
WHL22.221161	Med1=MED1	61.94	69.33	112.10	88.44	0.60
WHL22.22147		112.42	81.77	64.97	53.29	-0.71
WHL22.221501	Fam55c=FAM55C	8.75	17.42	26.36	29.60	1.17
WHL22.221540	SPU_014038=HMCN1	9.60	3.19	4.72	2.62	-0.65
WHL22.223462	SPU_025155=CCDC86	30.52	44.66	49.40	77.74	0.74
WHL22.22407	SPU_022419=CCDC94	10.67	11.23	20.04	14.23	0.62
WHL22.224324	Hypp_3070=MYH3	1.46	5.03	6.03	7.30	1.29
WHL22.224526	Sqle=C20orf117	6.80	27.33	19.44	44.53	1.11
WHL22.224579	Hypp_3048=RUSC2	9.18	7.00	5.55	4.43	-0.70
WHL22.224649	Dnaseg=DNASE1	2.38	1.58	4.07	3.12	0.88
WHL22.224833	SPU_020991=FBXL19	176.35	154.54	97.66	89.09	-0.82
WHL22.227689	Sak=PLK4	9.72	13.77	19.16	20.67	0.78
WHL22.229694	SPU_014137=SLC10A5	0.53	1.14	2.09	2.57	1.57
WHL22.229792	Acot8_1=ACOT8	2.11	4.11	4.75	4.99	0.72
WHL22.230113	SPU_004495=OR2A5	39.33	45.48	77.28	70.30	0.80
WHL22.230127	Z96=ZNF729	8.22	7.59	5.69	4.70	-0.61
WHL22.230650	Lrr/Lnb/7Tm/Gpcr=GPR125	10.92	7.16	5.91	5.86	-0.59
WHL22.230653	Lrr/Lnb/7Tm/Gpcr=GPR125	10.06	5.90	5.71	3.91	-0.70
WHL22.231476	SPU_006043=CRCP	8.75	9.17	14.78	14.41	0.71
WHL22.231749	SPU_020280=CHERP	7.59	9.73	5.34	5.60	-0.66
WHL22.232753	NA=TIMM8B	56.56	52.87	92.20	80.22	0.65
WHL22.232772	Hs2stL=UST	4.15	11.07	9.56	14.15	0.77
WHL22.235258		50.93	65.62	85.24	91.18	0.60
WHL22.23686	SPU_008297=AMBP	1.88	4.28	6.30	12.17	1.62
WHL22.23698	N6amt1=N6AMT1	6.47	8.03	12.69	10.44	0.68
WHL22.237794	SPU_002185=HNMT	2.01	3.16	4.30	4.40	0.79
WHL22.237869	SPU_005517=TMEM231	18.76	25.90	40.86	39.89	0.87
WHL22.239320	SPU_018403=AMOT	73.29	14.18	24.19	10.42	-1.02
WHL22.239326	Hypp_2386=TPRXL	4.64	3.18	2.00	1.47	-1.16
WHL22.240575	Hypp_1248=C8orf48	8.09	20.25	18.83	30.55	0.91
WHL22.24183	Fam60a=FAM60A	12.48	26.89	24.12	34.22	0.65
WHL22.24216	SPU_002251=TPR	2.34	3.12	4.14	5.68	0.84
WHL22.242427	GliA=GLI3	20.01	11.08	13.65	7.14	-0.59
WHL22.242934		12.88	62.52	49.04	123.80	1.46
WHL22.242938	Isa=SH3BP1	9.79	18.91	18.51	30.96	0.81
WHL22.244607	NaaladlL=FOLH1	0.63	1.93	2.65	2.60	1.25
WHL22.245306	NA=SLC25A23	9.18	17.19	6.68	10.08	-0.61
WHL22.245697	Axndhc5h=DNAH5	13.65	12.58	7.89	7.08	-0.81
WHL22.245700	Axndhc5h=DNAH5	20.46	15.56	13.03	10.49	-0.61
WHL22.247138	Z204=ZNF470	11.22	5.31	5.10	3.12	-0.96
WHL22.248712	Hypp_1545=LAMB4	39.85	54.23	24.79	36.15	-0.64
WHL22.248872	Entpd5=ENTPD5	57.56	29.99	38.46	19.59	-0.59
WHL22.24927	SPU_017629=YOD1	13.57	13.14	21.60	20.66	0.66
WHL22.249590	Tydp1=TDP1	5.06	4.57	7.50	7.09	0.60
WHL22.249775	Sfep9L=LRP1B	6.51	4.51	3.28	2.95	-0.80
WHL22.250134	H1-0=H1F0	633.83	635.05	1816.20	1537.77	1.40
WHL22.250288	SPU_012803=KCTD6	0.45	2.39	2.64	4.02	1.65
WHL22.251872	Sfe9=LRP2	1.23	3.56	4.42	5.11	1.18
WHL22.253891	Gg4=HS3ST4	29.11	34.01	46.31	71.61	0.87
WHL22.255584		148.98	119.52	209.79	197.74	0.61
WHL22.255680	NA=CTU2	7.85	13.31	18.57	16.93	0.79
WHL22.256071	Alpl_3=ALPL	2.51	10.36	6.52	12.89	0.85
WHL22.256196	Tubb2a=TUBB2C	6.95	2.43	11.63	8.77	1.29
WHL22.256205	SPU_004432=CLEC4G	29.90	23.88	67.41	72.63	1.39
WHL22.256501	Dysf2=DYSF	53.50	53.39	33.91	34.80	-0.64
WHL22.258956	Unk_45=ASCC1	2.21	3.17	3.82	4.28	0.61
WHL22.260711	C10orf58L=C10orf57	37.20	31.60	63.73	68.67	0.95
WHL22.261587	Peci_1=PECI	3.55	3.08	7.40	5.62	0.97
WHL22.261677		12.53	22.05	8.50	12.49	-0.69
WHL22.263438	Unc44_184=ANK3	2.79	2.63	1.87	1.51	-0.69
WHL22.263519	Unc44L_104=PYGO1	70.36	35.78	103.72	57.39	0.62
WHL22.264617	NA=NOTCH1	1.89	20.71	17.59	25.74	1.77
WHL22.265243	Dak_3=DAK	21.14	15.11	34.95	26.41	0.77
WHL22.265756	Vps13d=VPS13D	8.02	6.67	5.68	3.69	-0.68
WHL22.265771	Kcnma1=KCNMA1	41.48	26.58	23.98	17.03	-0.72
WHL22.266094		6.29	7.25	9.26	11.40	0.60
WHL22.270612	Yars=YARS	14.72	23.13	33.38	33.25	0.85
WHL22.271625	SPU_017667=LMBRD1	9.69	11.35	20.05	19.38	0.91
WHL22.271649	NA=LMBRD1	17.40	19.04	34.34	31.18	0.84
WHL22.271664	Mrpl13=MRPL13	37.71	28.16	55.06	49.45	0.68
WHL22.271968	ColL=COL5A2	11.68	8.25	7.15	5.22	-0.69
WHL22.273374	Hipkb=HIPK2	30.11	31.46	17.69	17.21	-0.82
WHL22.273913	NA=SRPX	3.09	1.66	6.20	4.46	1.21
WHL22.276158	Slc10a2_9=SLC10A2	3.24	2.09	1.65	1.28	-0.84
WHL22.278446	Smpdl3b=SMPDL3B	1.45	1.51	3.09	2.13	0.80
WHL22.278487	SPU_025599=SPERT	5.83	7.12	3.28	3.62	-0.91
WHL22.279115		60.51	66.08	98.79	92.96	0.60
WHL22.279866	NA=TDRD1	1.16	1.65	2.00	2.79	0.78
WHL22.280162	SPU_025678=ECE2	1.48	11.83	3.81	14.29	0.81
WHL22.280609	Agpat3_2=AGPAT3	2.69	5.01	6.40	7.25	0.89
WHL22.2808	Hypp_2431=FAM55D	13.14	35.22	43.54	49.28	1.10
WHL22.280947	Hypp_2858=NACC1	14.91	9.75	8.23	6.88	-0.68
WHL22.28152	Cars=CARS	5.29	10.57	17.81	15.55	1.16
WHL22.28166	Tada2l_1=TADA2A	3.67	5.13	8.40	7.01	0.82
WHL22.281760	Clect_41=PKD1	8.48	42.58	6.81	15.11	-0.91
WHL22.282889	MyIs4=MYH9	71.98	76.63	42.04	48.58	-0.72
WHL22.28390	SPU_022959=MIB2	1.92	2.13	2.88	3.63	0.68
WHL22.284116	Herc1_1=HERC1	5.34	5.68	4.18	3.13	-0.60
WHL22.286690	Lrr/Igr=CPN2	0.31	1.94	3.51	3.65	2.21
WHL22.286838	Arsi=ARSI	49.86	91.83	93.08	123.77	0.67
WHL22.287004	Atr=ATR	3.45	2.62	1.96	2.00	-0.60
WHL22.287238	Rej8A=C6orf205	29.08	14.37	35.60	33.27	0.75
WHL22.287978	SPU_005036=CALM1	34.21	17.58	54.92	26.31	0.63
WHL22.288453	Sarmr6=CREBBP	15.89	3.72	5.03	2.99	-0.99
WHL22.28868	Hyal1=C11orf73	6.20	7.75	11.44	14.39	0.89
WHL22.289118	NA=CHST1	121.29	86.99	166.95	145.44	0.60
WHL22.289653	SPU_024936=TUBB2C	4.76	11.04	13.78	14.54	0.97
WHL22.290080	Opn5L=OPN5	2.52	2.85	3.96	4.65	0.68
WHL22.291381	Alpi=ALPL	3.15	15.36	9.29	19.11	0.94
WHL22.291448	SPU_019170=SVEP1	7.92	4.54	5.83	1.94	-0.83
WHL22.291513	CopineL_1=CPNE9	58.22	109.98	149.71	174.71	1.01
WHL22.292281	Z295=ZNF384	1.46	3.12	22.71	16.85	3.20
WHL22.292551	NA=FAM38A	3.56	5.83	9.38	7.92	0.92
WHL22.292627	RigIL5=DDX58	1.93	1.45	4.92	3.90	1.39
WHL22.293155	NA=SMG1	16.80	8.13	9.20	4.10	-0.93
WHL22.294495	SPU_023498=IFI27	9.42	14.52	19.90	21.26	0.82
WHL22.294808		2.55	5.08	4.90	6.33	0.63
WHL22.295528	Ugt2c1=UGT2A3	58.56	98.00	98.45	133.73	0.60
WHL22.296012	SPU_005153=PRRT1	5.18	20.68	18.10	32.20	1.22
WHL22.296412		2.88	1.89	4.34	4.60	0.94
WHL22.297314	PusL1=PUSL1	1.67	2.63	2.92	3.60	0.63
WHL22.297424	SPU_005164=FREM3	16.73	53.79	40.37	68.61	0.81
WHL22.298975	Hypp_2450=DLL4	1.75	4.23	5.30	5.61	1.01
WHL22.299107	SPU_025783=DNLZ	3.42	9.32	5.33	15.87	0.71
WHL22.300713	NA=PHLDA3	8.32	13.60	18.92	23.75	0.99
WHL22.301067	SPU_017311=MOV10	23.33	37.18	55.97	62.40	1.00
WHL22.301088	Hypp_2885=ZNF385A	0.73	3.81	4.72	6.27	1.71
WHL22.302097	MacpfA2=BRSK1	1.79	2.50	6.54	3.73	1.23
WHL22.302383	OptnL=IKBKG	8.39	16.30	19.49	22.25	0.83
WHL22.302393	SPU_008113=XRCC6BP1	2.85	4.91	4.30	7.58	0.61
WHL22.302410	NA=DRGX	46.41	118.01	125.11	256.96	1.27
WHL22.302939	NA=FGD6	119.52	140.71	207.66	189.11	0.61
WHL22.304762	SPU_022490=C10orf137	7.71	5.33	5.94	2.98	-0.61
WHL22.307407	NA=ZNF771	158.76	279.89	285.92	470.79	0.80
WHL22.308370	MaoaL=AKT1	8.94	5.96	15.29	9.28	0.71
WHL22.310280	Z421=SLC16A12	24.89	64.30	75.56	89.35	1.04
WHL22.310563		3.12	6.44	10.35	7.99	1.02
WHL22.312106	SPU_020458=TMEM45B	12.86	49.24	23.05	65.61	0.62
WHL22.312449	NA=GPR45	3.92	10.86	8.37	15.90	0.82
WHL22.312467	SPU_005916=HNRNPM	8.36	14.36	20.58	23.42	1.00
WHL22.31324	Abca2_2=ABCA2	15.14	9.07	8.95	5.93	-0.69
WHL22.314874	Heatr7a=HEATR7A	2.82	2.54	1.95	1.51	-0.64
WHL22.314913	SPU_006151=MFAP4	22.93	44.15	48.24	68.88	0.85
WHL22.315409	SPU_006151=FIBCD1	23.88	43.63	39.99	63.58	0.64
WHL22.316708		336.93	268.95	160.18	142.15	-1.00
WHL22.317123	Hypp_2294=YLPM1	13.67	12.60	16.78	24.71	0.64
WHL22.317209	Abhd7_1=EPHX4	18.75	12.06	9.67	7.28	-0.84
WHL22.317476	NA=FNDC1	11.46	20.29	19.20	29.44	0.64
WHL22.317488	NA=NOS1	3.07	7.02	6.36	9.68	0.76
WHL22.317502	Abcc9a=ABCC9	1.03	2.89	3.82	4.41	1.25
WHL22.317518	Hypp_1159=DSPP	0.80	2.08	2.18	3.17	1.03
WHL22.317751	MifL1=MIF	4.79	8.21	14.56	11.38	1.04
WHL22.31846	Unk_67=RET	27.84	76.25	55.92	160.75	1.04
WHL22.319198	Ubr4_2=UBR4	11.26	7.83	6.54	2.49	-1.21
WHL22.319204	Ubr4_1=UBR4	9.87	9.32	5.26	2.64	-1.36
WHL22.320507	NA=ST6GALNAC5	8.86	16.11	20.78	37.60	1.23
WHL22.322240	SPU_027731=FBXW4	11.14	8.50	27.96	13.06	0.98
WHL22.323545	SPU_028282=FGFRL1	24.97	13.13	12.06	7.47	-0.93
WHL22.323869	Gsn=GSN	113.26	289.39	266.69	354.55	0.77
WHL22.324242	NA=KDM2B	3.05	1.84	5.04	3.92	0.91
WHL22.324255	SPU_021950=GRAMD1B	5.55	7.27	4.20	3.67	-0.70
WHL22.324483	Daglb=DAGLB	9.41	8.24	12.40	20.38	0.85
WHL22.32505	Chrnb3L=CHRNA4	2.84	2.40	6.99	4.89	1.17
WHL22.325309		81.21	92.35	25.83	63.64	-1.09
WHL22.325446	SPU_001866=MT1B	657.93	709.94	2198.73	1859.65	1.56
WHL22.325495	Ndufaf1=NDUFAF1	26.62	29.46	42.50	44.15	0.62
WHL22.325564	Hypp_420=TRIM2	17.93	35.79	39.66	58.26	0.92
WHL22.325784	Kiaa0329=TECPR2	9.39	4.22	5.08	2.63	-0.79
WHL22.327392	NA=TACR1	8.39	20.82	43.31	35.54	1.57
WHL22.327768	Mgc16943L=CBX4	3.71	6.15	6.90	7.67	0.60
WHL22.328358	Hypp_2969=TSSC4	2.78	3.77	6.77	4.54	0.78
WHL22.32917	Mrpl1l=MRPL1	32.05	36.04	54.80	51.65	0.65
WHL22.32929	Hypp_2120=TPRXL	541.02	418.15	835.04	725.71	0.72
WHL22.329844	Z34=ZNF56	16.58	17.60	11.27	11.01	-0.62
WHL22.330572	Rptp_mu_2=PTPRT	15.00	9.86	10.05	5.07	-0.77
WHL22.331378	Tlr072=SLIT2	2.84	2.04	4.91	4.52	0.97
WHL22.331400	NA=FAM184A	3.91	14.82	6.45	20.91	0.61
WHL22.331651	Zic2=ZIC4	5.07	7.21	2.36	4.19	-0.94
WHL22.332256		15.87	11.27	34.27	14.53	0.74
WHL22.332546	Hypp_2877=TP53I11	4.36	3.58	5.91	8.10	0.81
WHL22.332964	P160=CUBN	0.75	4.33	5.89	6.42	1.77
WHL22.333216	Apextrin_1=TBL3	8.55	4.37	18.16	19.29	1.62
WHL22.334586	Fut8_3=FUT8	17.64	14.06	10.13	10.02	-0.65
WHL22.334728	Ptcd1=RP5-900K19.1	2.97	7.95	9.09	12.17	1.11
WHL22.336168	Axndhch=DNAH14	9.68	8.04	5.83	5.14	-0.69
WHL22.33762	Vparpf_2=FAM98B	2.38	3.67	4.68	5.24	0.74
WHL22.33821	SPU_015309=MARCH2	54.12	159.41	249.44	285.75	1.52
WHL22.338926	SPU_021492=CENPL	66.00	81.13	108.21	112.27	0.59
WHL22.339399	Trpm_3=TRPM5	2.14	7.67	7.02	9.49	1.01
WHL22.33988	Higd1A_1=HIGD1A	6.22	14.54	10.82	19.10	0.59
WHL22.340682	Abcd4=ABCD4	0.94	4.94	3.42	7.44	1.22
WHL22.34090	Abhd3=ABHD3	11.00	4.02	19.64	9.21	1.02
WHL22.34128	SPU_010917=CRBN	8.16	9.22	14.02	20.23	0.95
WHL22.341821	ReelinL=RELN	17.99	10.47	8.74	6.02	-0.92
WHL22.342118	Gpx1=GPX5	8.37	13.42	17.59	19.30	0.80
WHL22.342203	Mipphp1=MINPP1	14.62	23.85	33.75	36.94	0.92
WHL22.3426	Imdzlprpn=AMDHD1	11.10	8.80	19.12	12.68	0.66
WHL22.343558	Ehmt1=EHMT1	52.76	58.39	97.06	92.16	0.77
WHL22.343869	SPU_010714=NSMCE2	4.50	9.15	8.88	11.68	0.67
WHL22.345627	Hypp_149=KIAA0355	5.10	4.62	3.73	2.47	-0.68
WHL22.346016	SPU_019488=DNAH8	23.68	16.38	12.12	9.42	-0.89
WHL22.346803	Mcfp=SLC25A39	9.21	11.10	18.39	14.37	0.69
WHL22.348211	064_2=C3	2.86	2.11	5.97	3.38	0.87
WHL22.348338	NA=PRPF38A	27.11	40.49	54.14	57.16	0.75
WHL22.350145	Hypp_236=SVEP1	4.63	3.92	2.87	1.94	-0.85
WHL22.350784	Zf(cchc)_26=NYNRIN	10.48	35.24	34.32	100.31	1.61
WHL22.354008	SPU_019646=RAD51	99.49	79.69	152.43	118.96	0.60
WHL22.355588	NA=DSPP	0.99	4.62	4.96	9.58	1.69
WHL22.35639	Hypp_1629=PRG4	8.43	11.30	16.63	15.78	0.73
WHL22.357497	SPU_010129=DNAH10	18.03	15.03	10.39	9.47	-0.74
WHL22.357870	Mif1=MIF	3.41	4.89	8.88	7.98	1.04
WHL22.358324	NA=HIST1H3D	149.33	302.84	326.64	395.98	0.76
WHL22.358807	Z440=ZNF84	4.61	3.94	6.45	7.14	0.67
WHL22.359	NA=LOR	7.00	8.33	4.62	5.52	-0.59
WHL22.35907	NA=CTSB	81.96	98.95	111.15	171.27	0.61
WHL22.359241	SPU_008641=C10orf84	1.92	6.99	3.92	8.65	0.67
WHL22.359665		11.02	21.83	22.13	30.96	0.76
WHL22.362066	Pde8A=PDE8B	2.93	3.39	2.32	1.70	-0.67
WHL22.362420	NA=TNRC18	0.36	0.96	2.16	3.10	2.13
WHL22.363039	Hypp_1744=TRIM33	0.41	1.81	3.16	5.65	2.29
WHL22.36324	Hypp_1098=ARID1B	5.34	16.98	41.50	52.47	2.29
WHL22.364012	SPU_001571=ARIH1	10.96	19.12	26.36	31.61	1.00
WHL22.364333	Hypp_1565=RIPK2	4.56	9.44	10.86	18.41	1.10
WHL22.364339	Hypp_1565=ZNF541	3.63	11.08	14.06	24.66	1.55
WHL22.364431	SPU_020973=MRPL27	28.00	30.30	44.02	44.82	0.60
WHL22.364467	Lrrkc=LRRK1	10.63	10.86	8.23	6.02	-0.61
WHL22.36453	SPU_023744=SCARB1	10.11	6.76	6.26	2.96	-0.94
WHL22.36456	NA=SCARB1	10.12	5.17	5.06	4.11	-0.67
WHL22.364737	Hexb_1=HEXB	24.08	33.67	45.07	47.25	0.70
WHL22.367710	Scpep1=SCPEP1	17.34	39.00	41.69	50.61	0.82
WHL22.368799	SPU_021177=RNF40	66.31	73.01	115.17	110.42	0.70
WHL22.369239	SPU_027620=FOXG1	153.60	112.35	254.50	349.35	1.19
WHL22.369439	Dus4l=DUS4L	9.31	7.59	13.05	13.24	0.65
WHL22.369484	SPU_028769=CENPK	28.43	44.03	52.74	57.35	0.64
WHL22.369567	Atbf1=ATBF1	27.72	12.02	12.32	8.80	-0.81
WHL22.36962	Csad_1=CSAD	5.17	7.17	9.11	10.53	0.69
WHL22.370870	Dnajhc4L=DNAJC4	15.03	47.68	61.15	67.04	1.25
WHL22.372223	Lemd3=LEMD3	33.51	59.11	73.69	76.30	0.76
WHL22.372588	Trpm3_8=TRPM3	7.18	5.88	3.96	3.48	-0.81
WHL22.373158	C1qL_4=C1QTNF1	298.68	836.17	545.95	1088.15	0.62
WHL22.374698	Kif6L=TPRXL	7.17	7.02	10.66	11.29	0.63
WHL22.375370	Slc16a14_2=AC037487.1	13.15	23.60	25.63	39.03	0.84
WHL22.375883	Perlc=HSPG2	49.73	22.36	26.22	17.67	-0.63
WHL22.376113	Ist1l=ISY1	19.93	25.48	32.73	35.23	0.59
WHL22.376236	Rara=RORA	4.12	4.85	3.21	2.58	-0.64
WHL22.377158	Tpd52L2=TPD52L2	100.73	111.54	64.46	73.93	-0.61
WHL22.377327	SPU_010803=CNFN	7.34	26.51	37.75	52.81	1.67
WHL22.377873	Dgat1=DGAT1	24.34	37.45	58.34	56.32	0.93
WHL22.37842	SPU_001010=MRPL55	16.24	31.57	36.35	41.41	0.77
WHL22.378499	Dnahc17L=DNAH17	7.94	7.89	5.20	4.83	-0.66
WHL22.379747	Naprt1=NAPRT1	24.81	26.81	45.04	34.98	0.62
WHL22.380314	NA=CASD1	10.71	20.04	19.25	31.05	0.74
WHL22.380372	Hypp_2019=CXXC5	16.68	33.10	40.76	43.64	0.84
WHL22.381484	Hypp_2820=FCN3	12.08	3.61	49.45	11.95	1.88
WHL22.381831	Trpm3=TRPM3	10.66	8.63	6.07	6.37	-0.62
WHL22.382254	Lrriq4=AC000120.8	6.00	8.40	3.37	4.65	-0.84
WHL22.382311	Reeler/Egf/Cub_1=NOTCH2	10.45	6.33	5.85	4.42	-0.68
WHL22.382327	Notch1-17=SVEP1	9.05	4.51	4.10	2.72	-0.94
WHL22.382372	NotchL_13=DLL4	9.92	3.63	4.78	2.89	-0.69
WHL22.382396	NotchL_13=NOTCH1	7.18	3.62	3.61	2.57	-0.74
WHL22.382414	NA=NOTCH2	25.62	17.70	17.47	6.57	-0.99
WHL22.382438	Reeler/Egf/Cub_1=DLL1	81.21	35.40	30.58	25.33	-0.94
WHL22.382468	Reeler/Egf/Cub_1=NOTCH1	4.03	2.73	1.41	1.43	-1.22
WHL22.382909	SPU_023864=SLC39A3	4.54	9.71	8.74	12.03	0.62
WHL22.383164	SPU_025973=HIST1H2BB	12.64	20.25	31.21	32.27	0.99
WHL22.383179	Hsd17b8=URM1	5.38	2.83	8.11	4.63	0.65
WHL22.383236	Hypp_1788=RET	2.95	6.54	6.54	9.28	0.82
WHL22.384649	Dnajc13-3=DNAJC13	11.15	10.29	8.33	5.53	-0.66
WHL22.386647	SPU_028079=C3orf26	11.67	16.52	25.42	21.76	0.76
WHL22.388354	NA=FYB	13.28	20.09	10.30	9.68	-0.71
WHL22.388411	NA=FAM169B	14.82	2.10	20.03	4.13	0.70
WHL22.388486		30.59	41.66	58.57	53.84	0.66
WHL22.389159	Thap2=THAP2	2.89	7.70	8.27	11.12	1.02
WHL22.389215	SPU_013277=JMJD1C	33.40	32.39	21.84	17.90	-0.73
WHL22.389472	Ugcg=UGCG	27.30	23.66	16.30	16.22	-0.64
WHL22.389481	Hypp_912=RPGR	9.95	12.71	6.51	8.51	-0.59
WHL22.389872	FoxG=FOXG1	44.17	31.36	22.13	21.96	-0.76
WHL22.39103	Pdcd6ip_2=AC008735.1	530.93	332.14	767.80	634.92	0.73
WHL22.391474	SPU_025152=ROBO3	21.38	15.27	10.71	8.68	-0.91
WHL22.391869	Inturned_1=INTU	4.74	4.75	3.92	2.44	-0.61
WHL22.393104		41.33	63.43	82.27	109.08	0.89
WHL22.393586	Vps13d-2=VPS13D	5.10	4.33	2.86	2.52	-0.80
WHL22.394271		7.01	16.95	11.41	24.82	0.62
WHL22.394524	Brap=BRAP	5.96	12.67	9.09	21.28	0.68
WHL22.395073	SPU_027480=JMJD5	8.46	21.95	17.76	36.94	0.91
WHL22.397011	SPU_025143=CUBN	17.92	33.82	51.38	60.77	1.19
WHL22.397027	NA=TLL1	15.71	10.17	22.94	16.86	0.64
WHL22.397621	Srcr222=DMBT1	3.03	2.76	6.24	12.30	1.60
WHL22.398159	NA=EIF2AK1	5.93	11.64	7.66	28.38	0.83
WHL22.398339	Hecah=HECA	1.79	2.98	3.64	3.80	0.69
WHL22.399157	SPU_011340=TTC12	105.19	176.22	77.66	87.07	-0.73
WHL22.400345	SPU_007132=AC124798.1	5.77	7.90	9.14	13.79	0.73
WHL22.400354		12.02	13.70	7.28	9.05	-0.66
WHL22.40115	SPU_004138=MUC5B	408.32	228.76	181.78	126.66	-1.01
WHL22.402261	SPU_017181=PLXNA2	26.18	25.72	21.21	13.86	-0.59
WHL22.404260		9.92	10.66	16.72	17.98	0.75
WHL22.405470	IrbitL=AHCYL2	9.06	11.89	20.74	15.74	0.79
WHL22.405628	PlasmgnL1=LPA	5.12	9.94	10.51	13.66	0.75
WHL22.405717	Msp130r6=GDAP1L1	4.39	4.77	1.72	2.89	-1.04
WHL22.405906	SPU_010678=C3	1.68	0.85	4.13	2.51	1.43
WHL22.407274	Z474=ZSCAN5B	200.41	248.54	310.93	482.47	0.79
WHL22.408118	SPU_023407=DNAH8	10.76	7.88	6.91	5.41	-0.59
WHL22.408131	SPU_020621=USP28	12.01	10.31	5.02	4.37	-1.25
WHL22.408784	Lrrka=LRRK1	2.34	2.45	1.23	1.92	-0.64
WHL22.40989	Mco1-2=HEPH	7.46	7.16	17.59	12.16	1.00
WHL22.41285	Lass6=LASS5	6.11	4.25	3.87	2.93	-0.60
WHL22.413246	Foxred1=FOXRED1	7.52	4.73	4.82	2.78	-0.71
WHL22.414995	Slco3a1=SLCO3A1	15.43	13.53	41.05	33.96	1.37
WHL22.415265	Rgn_2=RGN	6.71	18.73	10.28	37.42	0.81
WHL22.416230	SPU_027316=CTSB	93.76	106.93	135.04	190.61	0.68
WHL22.416463	Hypp_2663=FOXI2	19.08	9.88	11.15	7.32	-0.60
WHL22.417294	Srcr142=DMBT1	500.63	590.37	805.73	1019.20	0.74
WHL22.417607	NA=SPTBN2	19.60	4.96	7.01	3.33	-1.02
WHL22.418139	SPU_003398=NOSIP	8.62	14.19	25.97	19.69	1.03
WHL22.418632	Aldh9aLf=ALDH9A1	2.68	7.88	9.83	14.60	1.38
WHL22.419472	Hypp_676=SFRS16	6.44	4.68	4.26	2.75	-0.69
WHL22.419768	Fuk_1=FUK	8.82	11.96	7.17	5.50	-0.71
WHL22.421278	Kctd15=KCTD1	6.15	8.16	3.82	4.74	-0.73
WHL22.421558	Slc9a2=SLC9A5	22.14	12.11	12.49	8.16	-0.70
WHL22.421612	Rreb1=RREB1	80.83	93.75	111.60	157.77	0.61
WHL22.422884	Gulp1=GULP1	30.13	26.59	19.78	17.60	-0.60
WHL22.422905	Lyplal1=LYPLAL1	4.97	5.57	10.42	6.78	0.68
WHL22.423666	Hypp_2974=ISPD	7.98	12.15	13.43	16.49	0.59
WHL22.423696	Delta=DLL1	30.24	58.03	69.19	78.44	0.81
WHL22.423729	Chac=CHAC1	31.18	43.57	57.23	57.18	0.64
WHL22.424302	SPU_007883=C3	0.79	1.10	5.75	2.78	2.10
WHL22.424740	Veph1_1=VEPH1	5.21	7.15	3.88	4.06	-0.62
WHL22.425197	Cxorf30L_1=CXorf22	17.55	19.12	14.57	9.99	-0.60
WHL22.426139	NA=XAF1	6.72	9.46	9.89	14.83	0.60
WHL22.427416		10.09	4.47	24.67	7.03	0.97
WHL22.428195		3.48	3.64	2.14	1.88	-0.82
WHL22.428229	SPU_013397=C9orf85	28.97	48.64	54.47	58.80	0.59
WHL22.428413	Tal1ph=TLN2	38.92	27.49	19.95	21.33	-0.67
WHL22.428433	SPU_023887=SLC4A4	45.40	45.42	77.33	95.68	0.92
WHL22.429670	NA=SUB1	5.04	9.76	10.31	13.45	0.74
WHL22.430790	PolppL_99=SVEP1	7.88	11.91	13.68	15.52	0.59
WHL22.431094		2.20	1.09	2.93	3.08	0.95
WHL22.431375	NA=AC008735.1	14.09	15.03	23.99	20.07	0.59
WHL22.431394	Hypp_2039=SETD1A	14.58	14.37	27.11	27.81	0.92
WHL22.43303	Fam55cL_2=FAM55A	11.98	21.94	25.99	31.86	0.83
WHL22.43309	Fam55cL_2=FAM55A	17.29	25.28	31.94	43.37	0.83
WHL22.434047	Hypp_877=DOK7	17.31	15.67	12.78	8.35	-0.68
WHL22.434952		1.62	1.81	3.02	3.51	0.93
WHL22.435379	Fras1=FRAS1	9.53	10.49	6.38	5.43	-0.76
WHL22.436220	Tmem63b=TMEM63B	3.06	4.43	1.91	2.40	-0.78
WHL22.436572	NA=UBR4	11.67	9.91	9.36	4.82	-0.68
WHL22.436584	NA=UBR4	9.73	8.12	6.72	3.67	-0.84
WHL22.436593	NA=UBR4	7.59	8.15	5.93	2.21	-1.12
WHL22.437697	Hypp_1563=TPRXL	263.39	243.75	455.85	381.40	0.72
WHL22.437856	Pla2L=JMJD5	10.25	9.60	14.49	16.60	0.65
WHL22.437914	NA=NCKAP5	8.72	3.59	16.20	8.12	1.03
WHL22.438181	SPU_014546=VPS13D	6.55	4.09	4.38	2.34	-0.70
WHL22.438571	Galnt7=GALNT7	21.76	14.04	37.49	24.61	0.80
WHL22.438608	Polr2i=POLR2I	106.17	132.96	171.35	199.27	0.64
WHL22.438804	Cyp3L4=CYP3A4	9.45	18.07	20.13	27.52	0.85
WHL22.438976	Msp130r1=PLXND1	111.12	189.08	198.55	269.81	0.68
WHL22.440561	CdoL=CDON	16.51	10.89	10.75	6.49	-0.69
WHL22.441414	Hao1_7=HAO1	1.04	2.75	2.21	3.86	0.79
WHL22.441487		94.71	105.19	62.06	55.23	-0.77
WHL22.442626	Polr2c=POLR2C	85.67	181.55	200.73	226.92	0.78
WHL22.443163	SPU_004899=RARA	9.54	12.60	18.87	16.99	0.70
WHL22.444017	Glt_1=TADA3	101.75	32.57	55.47	23.67	-0.67
WHL22.444763		3.71	11.33	25.35	16.57	1.66
WHL22.446111		10.52	4.39	13.12	8.17	0.61
WHL22.446214	Nacha2=CHRNA2	0.75	3.27	4.32	4.68	1.52
WHL22.446232	Nacha2=CHRNA4	1.02	3.26	3.92	4.41	1.19
WHL22.446317	Dnahc5=DNAH5	32.95	42.88	25.26	23.38	-0.63
WHL22.446551	Endrvt65=KIAA1045	3.16	3.61	6.04	6.46	0.89
WHL22.451368	Cecr1L=CECR1	1.73	4.65	4.93	6.61	1.01
WHL22.452482	Gal3st1_9=GAL3ST1	2.04	2.73	4.74	3.76	0.84
WHL22.452609	SPU_000152=NOTCH2	37.57	53.55	78.31	86.57	0.88
WHL22.452802	Ass=ASS1	5.97	5.58	15.37	10.88	1.16
WHL22.454108	SPU_007258=FBXL15	10.82	6.88	19.16	13.39	0.89
WHL22.45444	SPU_004960=C2orf47	39.24	51.05	70.21	71.59	0.67
WHL22.454675	Hypp_2027=TPRXL	6.18	8.75	16.26	12.81	0.97
WHL22.455063	Hypp_42=RPGR	0.85	3.25	3.56	5.91	1.46
WHL22.455242	SPU_017884=OPA1	7.49	5.40	2.97	3.30	-1.02
WHL22.455935	SPU_014958=RUNX1	9.06	7.89	22.41	19.46	1.31
WHL22.456851	Axndhc10h=DNAH10	11.29	13.59	7.41	8.00	-0.69
WHL22.456857	NA=DNAH10	17.73	23.60	12.12	11.90	-0.77
WHL22.457318	SPU_016317=ANAPC5	5.87	8.74	3.68	3.97	-0.91
WHL22.457909	Rbms3=RBMS1	222.51	196.84	116.32	134.53	-0.74
WHL22.457935	NA=ERVWE1	230.42	468.74	503.21	683.98	0.84
WHL22.458528	SPU_023259=ARHGDIA	384.84	554.95	703.98	734.80	0.64
WHL22.46001	NA=CCDC108	28.42	18.53	12.20	12.54	-0.89
WHL22.461127	Hnmtl=BAG4	47.83	145.42	340.85	227.70	1.74
WHL22.462258	NA=ESX1	1.36	5.55	21.59	23.18	3.03
WHL22.462300	NA=ADAMTSL3	0.51	2.22	3.36	4.45	1.86
WHL22.464657	PlasmgnL2=LPA	5.93	12.78	25.58	17.61	1.28
WHL22.467316	Rdh8_1=RDH8	2.92	5.28	3.83	11.06	0.73
WHL22.467426	Dem1=DEM1	4.32	11.94	10.09	16.30	0.83
WHL22.467439	SPU_009045=DEM1	1.86	4.11	6.19	5.73	1.10
WHL22.467444	Srrd=SRRD	2.08	6.14	4.78	8.59	0.84
WHL22.467492	Rad51L3=RAD51L3	1.31	1.79	3.13	3.12	1.03
WHL22.467582	Sbdsh=SBDS	16.06	14.64	24.53	21.98	0.60
WHL22.467929	Pxmp3=LIG3	3.69	10.73	8.74	13.05	0.76
WHL22.46798	SPU_004478=TSPAN9	4.37	4.73	8.64	6.84	0.76
WHL22.468227	Srd5a1_1=SRD5A1	6.71	8.19	12.81	13.11	0.81
WHL22.468822	Hypp_696=SVEP1	3.06	4.94	2.26	2.71	-0.66
WHL22.469736	SPU_011862=FXC1	14.93	13.32	27.10	20.51	0.74
WHL22.469818	SPU_024091=ZNF629	13.33	13.05	25.83	21.82	0.84
WHL22.469821	NA=OTOF	11.40	9.92	22.70	16.10	0.84
WHL22.470024	SPU_013251=KDSR	10.20	7.94	14.98	14.18	0.70
WHL22.470678	SPU_004194=MBLAC1	3.42	4.17	6.56	7.59	0.90
WHL22.470703	Hypp_961=TPRXL	18.17	28.91	34.32	38.58	0.67
WHL22.471012	NA=GPR137B	3.65	5.89	2.78	3.18	-0.64
WHL22.471249	NA=UGT1A4	5.89	7.94	10.75	10.47	0.64
WHL22.472935	TspN/Tsp1=COL11A1	5.79	2.65	1.81	1.56	-1.22
WHL22.473021	NA=C19orf55	1.70	2.59	2.74	4.66	0.77
WHL22.473735	Cox11l=COX11	11.48	13.67	21.72	18.45	0.68
WHL22.47594	SPU_021881=ATG13	5.17	4.28	3.46	2.60	-0.65
WHL22.475967		3.63	6.86	7.29	12.83	0.96
WHL22.476018	Yp301=TGFBI	12.19	24.62	29.24	32.50	0.83
WHL22.47693	Unk_6=EFTUD2	28.76	44.54	51.19	69.78	0.74
WHL22.476970	Hypp_1003=ENAH	55.39	35.11	33.78	25.01	-0.60
WHL22.477769	Csk=CSK	24.46	26.33	17.13	14.82	-0.67
WHL22.477908	NA=SCRIB	1.84	1.16	3.60	2.00	0.88
WHL22.478120	SPU_006228=DBX2	18.37	21.27	13.01	10.71	-0.74
WHL22.478132	Hypp_844=DSP	20.08	18.47	13.77	10.20	-0.70
WHL22.478661	Dazap=DAZAP1	7.73	28.28	34.73	44.75	1.42
WHL22.478685	NA=CHST11	5.72	3.61	3.18	2.64	-0.65
WHL22.478743	SPU_024007=CCDC88B	5.93	7.43	14.06	15.51	1.16
WHL22.478863	Ksr2=KSR2	14.37	48.44	49.70	68.22	1.14
WHL22.478891	DolkL=DOLK	5.01	7.57	12.51	11.43	0.96
WHL22.478923	Lonp1=LONP1	8.03	10.92	16.08	14.44	0.70
WHL22.478968	Lon=LONP1	13.91	17.83	30.33	26.27	0.84
WHL22.478999	SPU_028034=STRA6	13.06	36.46	31.74	55.08	0.94
WHL22.47945	NA=GORAB	93.35	170.33	181.11	280.95	0.84
WHL22.47946	PppL_120=C22orf45	34.34	58.54	64.24	95.86	0.80
WHL22.479681	Ercc3=ERCC3	10.35	13.51	16.69	26.72	0.83
WHL22.480917	SPU_014421=TP53I13	8.40	30.28	43.91	62.26	1.72
WHL22.482419	Giltl=IFI30	22.03	40.49	44.37	59.37	0.78
WHL22.48544	Slc17a5_2=SLC17A5	23.37	20.95	46.46	33.48	0.83
WHL22.485896	Gpr27L=GPR27	35.65	42.36	57.63	61.85	0.62
WHL22.485980	Pdpi(cyclophilin)L6=PPIL1	94.29	105.24	159.91	142.59	0.60
WHL22.486240	Zizimin1=DOCK9	9.31	13.98	7.19	7.08	-0.68
WHL22.487566	Tecp4=PZP	1.09	3.44	6.84	9.15	2.03
WHL22.487719	D123l=CDC123	9.28	18.10	41.09	34.19	1.53
WHL22.488987	Rhop4=RAC2	12.40	13.66	23.00	17.71	0.63
WHL22.493223	Rej1=PKDREJ	0.97	4.82	2.91	6.28	0.98
WHL22.493578	Cgi09l=TRMT6	41.03	60.71	90.38	91.12	0.86
WHL22.494583	Yap1=YAP1	57.36	70.18	39.97	38.87	-0.69
WHL22.494748	AsmtL=ASMTL	3.23	3.12	5.19	4.54	0.61
WHL22.494760	Imp=IGF2BP1	658.18	571.40	393.96	371.30	-0.68
WHL22.495950	NA=ABCC9	222.24	187.86	151.20	112.11	-0.65
WHL22.495958	Ack1_1=TNK2	47.80	50.48	31.91	31.86	-0.62
WHL22.496427	NA=ZNF84	22.03	70.60	41.12	90.46	0.63
WHL22.49660	Ajpx3=ARL10	760.66	520.90	1527.76	798.67	0.81
WHL22.496632	Cerk=CERK	3.01	6.01	5.88	8.98	0.77
WHL22.496839	Chst11_11=CHST9	3.36	6.27	1.88	3.53	-0.83
WHL22.497542	Z23=ZNF729	2.24	3.39	4.32	4.67	0.70
WHL22.49779	Fut4L_2=FUT4	5.79	34.60	52.11	48.84	1.83
WHL22.498011	NA=GOLGA6L6	71.23	64.77	50.93	33.52	-0.71
WHL22.498495	Hypp_2528=TRIM59	0.49	2.07	2.29	3.34	1.46
WHL22.500215	SPU_023163=FAM20A	11.97	61.27	71.63	98.01	1.63
WHL22.500595	Pgbd4=PGBD4	10.38	3.27	15.84	5.95	0.73
WHL22.500934		3.60	10.58	8.03	20.19	1.04
WHL22.502001	SPU_017440=BANP	4.76	4.97	7.15	13.92	1.04
WHL22.50219	SPU_005583=TPRXL	14.54	3.99	19.26	7.01	0.61
WHL22.502202	Mtss1L_2=MTSS1L	11.26	9.57	7.20	5.96	-0.67
WHL22.503015	NA=SBDS	12.26	13.58	18.90	20.18	0.59
WHL22.503644	Tbr=TBR1	42.75	89.77	84.72	134.14	0.78
WHL22.504589	SPU_014407=CDKL1	10.13	44.63	5.08	30.30	-0.78
WHL22.504693	Hypp_391=CSMD3	11.91	59.81	46.11	85.95	1.23
WHL22.504951	Eggbr1L_1=SVEP1	48.37	21.98	21.22	15.91	-0.83
WHL22.507257	Pycr1L=PYCR1	2.41	3.57	3.74	5.53	0.63
WHL22.50732	SPU_024753=DMBT1	16.86	6.33	8.72	4.38	-0.74
WHL22.508748	TspO=TSPO	3.04	5.43	6.94	7.42	0.82
WHL22.511375	Hypp_1968=IVL	31.59	27.68	46.84	48.81	0.69
WHL22.511927	C1orf58=C1orf58	20.22	31.90	36.21	43.87	0.65
WHL22.511996	Muc19L=PASD1	9.22	3.97	4.62	1.98	-1.00
WHL22.511999	Muc19L=PELP1	20.24	12.24	13.01	8.30	-0.60
WHL22.513078	NA=LRP6	18.85	6.47	10.64	4.80	-0.63
WHL22.513081	NA=LRP6	48.83	29.96	25.53	22.32	-0.68
WHL22.513633	Bves=BVES	0.85	1.90	2.90	2.68	1.14
WHL22.514021	C9orf64L=C9orf64	5.73	6.41	9.46	9.05	0.61
WHL22.515757	Ank1L_1=ANKRD28	3.35	5.26	6.23	6.51	0.60
WHL22.515970	Cg31140pa=DGKQ	14.15	11.09	7.89	7.52	-0.70
WHL22.516478	Dgkq=DGKQ	22.99	17.93	13.44	12.74	-0.63
WHL22.516762	Myo19L=MYO19	20.51	32.43	49.31	38.98	0.77
WHL22.51705	Hyalin2=NOTCH1	206.55	376.15	168.94	98.79	-1.11
WHL22.517425	Mtap=MTAP	27.26	52.27	45.99	73.76	0.62
WHL22.517513	Sm30D=SF3A2	0.47	1.98	8.25	13.00	3.42
WHL22.517576		5.04	5.82	7.76	8.79	0.60
WHL22.518105	SPU_018106=NOSIP	44.98	94.89	106.58	117.10	0.77
WHL22.519374		5.61	6.48	9.22	15.59	0.99
WHL22.520179	Hnf1aL=HNF1A	8.43	6.26	4.35	4.75	-0.68
WHL22.52081	Wnt5=WNT5B	59.02	49.49	82.39	83.02	0.61
WHL22.521321		7.95	17.76	13.01	25.54	0.61
WHL22.521635	Slc45a2_2=SLC45A1	1.37	1.66	3.03	3.00	1.00
WHL22.52221	Gamt=GAMT	1.63	4.99	3.50	8.48	0.93
WHL22.522544	Rnf145=FAM113A	1.36	2.30	3.35	2.78	0.79
WHL22.523236	NA=ARSB	25.60	26.86	32.14	58.24	0.73
WHL22.523242	Hypp_2625=APOL1	212.15	193.87	128.14	135.12	-0.62
WHL22.5237	Dpy19l1=DPY19L1	18.90	18.43	35.54	28.13	0.76
WHL22.523894	Cask_1=CASK	27.19	38.06	19.45	22.78	-0.61
WHL22.524652	Srcr217=DMBT1	7.44	11.75	4.13	6.84	-0.81
WHL22.524748	Hypp_86=TEP1	39.70	107.21	85.81	130.99	0.70
WHL22.524809	St6galnac2_1=ST6GALNAC1	8.02	7.63	15.42	9.28	0.61
WHL22.525786	Dnajhc17=DNAJC17	4.41	6.65	5.91	15.07	0.80
WHL22.526295	Wdfy3_1=WDFY3	4.10	2.90	2.31	1.63	-0.83
WHL22.529774	Ccdc6=CCDC6	52.55	41.98	32.06	25.39	-0.72
WHL22.529784	Hypp_258=TMEFF2	51.15	64.72	96.83	110.49	0.84
WHL22.531128	NA=KIAA1009	6.70	10.57	12.98	16.81	0.81
WHL22.531406		49.90	52.17	70.95	83.64	0.59
WHL22.532031	Z128=ZFP161	4.73	9.59	14.32	12.79	1.01
WHL22.532456	Hs3st2=HS3ST2	46.58	105.67	89.12	157.97	0.76
WHL22.534817	NA=CTSC	13.94	14.96	22.67	22.21	0.64
WHL22.53517	Udg=UNG	49.16	52.33	79.93	78.70	0.65
WHL22.53537	Hypp_2754=DSPP	5.59	14.25	11.35	21.02	0.79
WHL22.537975	SPU_028005=NUPL1	9.06	14.50	17.39	20.57	0.72
WHL22.538480	Fos=FOSB	0.92	7.03	2.00	18.63	1.27
WHL22.538507	Nfat=NFAT5	101.92	127.68	193.79	186.76	0.74
WHL22.538512	HspC152l=TRMT112	75.56	71.69	120.99	101.11	0.59
WHL22.539554	NA=ODZ2	92.81	74.47	191.60	117.49	0.85
WHL22.540093	Yars_1=YARS	16.26	20.70	33.84	33.84	0.89
WHL22.540186	SPU_018140=TPRXL	12.29	42.99	76.97	70.64	1.69
WHL22.5406	Phtf2L=PDZD4	14.23	19.29	26.87	32.87	0.84
WHL22.541244		1.34	1.87	3.80	2.87	1.06
WHL22.541519	Slc9a10=SLC9A11	5.24	4.39	8.97	6.58	0.68
WHL22.541844	Fn3/Egff_2=TIE1	2.31	5.09	4.25	6.35	0.60
WHL22.54256	Elp3_1=ELP3	13.91	40.38	29.80	53.83	0.76
WHL22.542626	SPU_010451=TMEM70	3.45	8.48	6.74	13.76	0.83
WHL22.544150	Dr_1=ARID3A	13.62	13.53	21.69	22.79	0.71
WHL22.544154	Dr=ARID3A	18.22	20.95	26.83	37.52	0.70
WHL22.544732	Hypp_1201=MLL2	8.18	7.43	4.19	4.19	-0.90
WHL22.545648	NA=ZFP2	3.18	10.53	5.84	15.03	0.70
WHL22.546676	SPU_018496=ACN9	42.08	66.17	68.02	96.59	0.62
WHL22.546687		6.70	44.04	4.08	20.43	-0.92
WHL22.547328	SPU_024250=GSN	147.84	223.78	85.71	69.56	-1.24
WHL22.547334	Ewamph=GSN	2.52	5.62	4.80	7.09	0.64
WHL22.548684	Gal/lec10=MUC2	1.35	3.74	2.34	7.10	0.85
WHL22.549739	Chchd2_1=CHCHD2	134.06	267.48	220.91	437.04	0.71
WHL22.550412	Myo3b=MYO16	25.22	47.50	19.05	19.12	-0.85
WHL22.55201	Mt1=MED15	6949.53	10173.82	25876.26	30961.93	1.75
WHL22.552404	NA=RP11-159G9.5	3.88	6.02	2.87	2.38	-0.89
WHL22.552806	Hus1=HUS1	13.79	16.76	25.53	23.88	0.70
WHL22.552899	Cvp18=C1QTNF3	5.32	33.34	41.68	42.15	1.65
WHL22.553119	Pofut2=POFUT2	23.32	30.27	38.43	42.88	0.61
WHL22.554277	SPU_027780=CHRD	22.28	23.84	30.52	42.34	0.64
WHL22.554381	CdkL5-1=CDKL5	10.67	5.98	4.36	4.34	-0.88
WHL22.554921	SPU_008164=MYL1	2.23	6.47	7.17	10.18	1.17
WHL22.555612	Hk1=HK1	75.94	20.38	31.77	13.65	-0.92
WHL22.556053	Pdpi(cyclophilin)L3=PPIB	5.85	10.09	13.52	16.33	0.95
WHL22.55699	Nos2L=NOS1	11.29	13.47	5.46	5.31	-1.20
WHL22.557504	Plekha1=PLEKHA1	41.72	58.67	34.55	29.50	-0.63
WHL22.559194	IlvbL_1=ILVBL	10.53	18.12	23.97	21.98	0.73
WHL22.559224	Ilvbl=ILVBL	14.13	21.12	29.08	25.40	0.66
WHL22.559422	Dmbt1L_10=LRP1B	6.54	10.36	4.17	6.47	-0.67
WHL22.559449		4.22	4.89	6.66	8.77	0.75
WHL22.559716	Axndhc9h=DNAH9	51.18	61.63	38.54	35.39	-0.60
WHL22.559873	NA=TECPR1	4.57	3.97	2.46	2.89	-0.68
WHL22.560016	NA=EDIL3	6.38	3.18	10.68	7.41	0.98
WHL22.56167	NA=HARBI1	65.20	41.05	109.93	67.24	0.73
WHL22.562201	Nan2=NANOS2	59.69	27.89	89.32	74.56	1.00
WHL22.562614	EhH4_64=HIST1H4K	128.17	174.76	486.50	457.89	1.66
WHL22.5631	Surreal/Gpcr117=ADRA1D	7.03	8.44	14.36	18.05	1.06
WHL22.563585	Trpc3_1=TRPC1	89.35	68.32	51.78	42.54	-0.74
WHL22.564023		23.74	10.25	34.05	22.75	0.83
WHL22.564289	Egfib_2=NOTCH2	141.01	170.65	114.70	67.56	-0.82
WHL22.566205	Ddo_1=DDO	91.52	109.41	157.89	161.57	0.68
WHL22.56695	Ust=UST	1.65	2.38	2.98	4.28	0.85
WHL22.566997	NA=BRSK2	12.64	13.14	22.88	19.43	0.71
WHL22.567551	Cdc23=CDC23	5.49	9.24	10.13	11.46	0.59
WHL22.568755	Hypp_178=SVEP1	5.92	6.80	4.67	3.38	-0.68
WHL22.568948	Z288=SKI	3.85	6.18	7.42	8.51	0.70
WHL22.569203	Sord_1=SORD	12.96	7.47	20.77	12.20	0.70
WHL22.570570	Glce=GLCE	41.53	14.53	18.65	11.93	-0.71
WHL22.573934	Pex13_1=PEX13	12.58	15.44	17.86	25.26	0.61
WHL22.576222	Hk1_1=HK1	33.91	23.44	20.26	16.50	-0.62
WHL22.577323	Hypp_3014=RPGR	3.68	8.48	14.24	19.67	1.58
WHL22.577909	Oprk1L=ADORA2B	16.77	17.80	32.04	28.34	0.80
WHL22.578679	Slc30a3=SLC30A2	34.02	0.85	52.08	3.16	1.25
WHL22.578971	NA=RCOR2	19.13	26.00	32.49	38.47	0.67
WHL22.579577	B3gntl1_1=B3GNTL1	6.72	5.00	10.64	8.03	0.67
WHL22.579589	B3gntl1_1=B3GNTL1	3.91	3.98	7.56	6.80	0.86
WHL22.579799	Ak3l1=AK3	21.39	27.75	46.52	49.07	0.97
WHL22.581111	Cbp=CREBBP	87.86	119.60	146.15	164.02	0.59
WHL22.581121	Cbp=EP300	132.59	162.87	236.06	299.13	0.85
WHL22.58273	SPU_005396=RTTN	17.13	15.26	12.37	8.79	-0.64
WHL22.584061	NA=NEU4	8.35	3.76	11.14	8.10	0.77
WHL22.58443	Fbxo32=FBXO32	0.96	7.14	4.77	11.76	1.52
WHL22.586912	Fn3rch=FN1	5.93	8.77	11.48	11.50	0.67
WHL22.587031	Ifltd1L=IFLTD1	24.43	45.50	20.24	22.80	-0.64
WHL22.587656	Rabrp3=RAB35	10.43	27.32	35.18	50.52	1.32
WHL22.589072	Oatflp=CASD1	8.64	14.91	17.36	22.70	0.81
WHL22.589078	Oatflp=CASD1	6.73	22.40	22.66	30.56	1.10
WHL22.589307	PlexA4_2=PLXNA4	22.60	15.95	12.63	11.61	-0.65
WHL22.59278	Gnbp1/2/3B=SEC14L4	16.92	57.13	70.52	104.04	1.46
WHL22.59293		4.61	9.39	13.63	15.41	1.14
WHL22.593350	Tecpr1=TECPR1	6.17	5.80	3.48	3.30	-0.82
WHL22.593640	NA=CDON	4.98	6.38	7.04	11.91	0.70
WHL22.594267	NA=NOTCH2	6.23	3.04	3.33	2.50	-0.59
WHL22.595234	Scnn1g_1=SCNN1D	19.00	11.63	27.86	18.85	0.62
WHL22.596299	Ccdc108=CCDC108	20.63	17.94	12.45	12.75	-0.61
WHL22.596782	Wnt1=WNT1	30.79	48.85	59.90	77.47	0.81
WHL22.59697	Cyfip2_2=CYFIP1	13.82	12.18	8.81	6.37	-0.79
WHL22.598028	SPU_028323=RP4-697K14.7	1011.73	780.97	7603.54	1897.86	2.10
WHL22.599294	Idh3b=IDH3B	28.26	42.41	55.50	56.60	0.69
WHL22.60018	Slc16a2_1=SLC16A10	2.29	5.09	6.28	6.43	0.90
WHL22.601343	SPU_022067=ACHE	31.73	13.65	45.58	22.80	0.63
WHL22.603112	Ron=MET	16.00	8.30	10.87	5.07	-0.64
WHL22.603167	Ron=PLXNA1	12.50	4.79	6.10	2.84	-0.89
WHL22.603748	Hunt(middle)=HTT	5.49	5.91	3.27	3.38	-0.78
WHL22.604689	NA=RCC2	112.56	117.33	76.33	63.63	-0.72
WHL22.604887	Xpapd=XPNPEP1	15.50	15.16	11.37	8.58	-0.64
WHL22.604980	Hypp_2804=LONRF1	13.57	5.20	5.13	1.72	-1.50
WHL22.605193	SPU_022848=DPP7	7.84	10.41	17.88	15.15	0.86
WHL22.60674	Spnsh1=SPNS1	18.86	27.38	33.79	36.92	0.64
WHL22.607361	Hypp_1162=TRIM2	4.46	6.42	11.15	8.76	0.89
WHL22.60770		60.49	37.76	95.77	68.96	0.77
WHL22.607943	SPU_025652=PPP1R10	15.72	3.59	31.27	17.05	1.62
WHL22.608544		5.65	19.35	14.61	23.72	0.83
WHL22.608833	C12orf63L=C12orf63	11.55	10.64	9.48	5.07	-0.68
WHL22.608839	Tmem39a=TMEM39A	15.48	19.37	39.03	37.39	1.14
WHL22.608876	Tulp4L=TULP4	7.51	7.80	4.51	4.49	-0.77
WHL22.609170	Hypp_884=FEM1A	7.20	13.22	15.87	17.08	0.76
WHL22.61221		12.39	11.12	8.05	7.31	-0.61
WHL22.613479	NA=DSPP	3.35	2.13	1.79	1.30	-0.80
WHL22.614416	Z316=ZNF84	11.42	30.13	37.86	56.60	1.32
WHL22.614622	SPU_020601=SPC25	115.39	130.12	201.50	170.42	0.59
WHL22.615076	Ch25h=CH25H	4.11	2.75	5.32	4.92	0.60
WHL22.615301	Scn5a=SCN1A	6.66	4.16	3.55	2.99	-0.70
WHL22.615741	Rtp4L=RTP4	1.94	5.12	4.85	6.77	0.86
WHL22.615757	Hypp_2295=MED12	67.83	93.44	176.27	120.29	0.87
WHL22.615859	Bbox1_6=BBOX1	0.28	1.58	2.36	2.19	1.77
WHL22.616102	SPU_016697=GABRB2	3.23	3.96	6.91	6.10	0.86
WHL22.616804	NA=SORT1	28.94	30.37	45.90	46.61	0.65
WHL22.617550	NA=CACNA1B	80.83	64.94	49.62	44.32	-0.62
WHL22.618366	Fam55c_5=FAM55B	8.92	13.51	5.30	8.83	-0.68
WHL22.618674	Cdc7=CDC7	12.17	22.63	27.47	27.41	0.72
WHL22.619821	Dnajc28=DNAJC28	24.16	16.81	34.91	26.44	0.59
WHL22.621173	SPU_009545=MRPL9	25.82	24.65	40.51	43.84	0.74
WHL22.621925	NA=DSPP	2.56	2.18	6.67	4.96	1.28
WHL22.62244	Park2=PARK2	2.61	4.76	4.77	7.31	0.74
WHL22.622974	Perlc_2=HSPG2	43.37	18.72	20.39	12.71	-0.83
WHL22.623022	NA=HSPG2	33.56	11.58	16.70	7.93	-0.78
WHL22.623803	PionL=MEST	7.88	4.74	11.77	8.52	0.71
WHL22.623866	NA=TMEM163	51.30	69.00	102.18	87.78	0.67
WHL22.62429	Pdcd2=PDCD2	4.51	7.89	11.90	12.05	1.00
WHL22.62448	Pdcd2=PDCD2	4.35	6.45	7.46	9.63	0.68
WHL22.625426	Nstrn=NCSTN	56.00	68.31	106.02	92.47	0.68
WHL22.625915	Ddx41=DDX41	28.55	32.55	50.27	44.62	0.64
WHL22.626688	SPU_013088=KDM6A	12.18	11.21	8.15	6.19	-0.72
WHL22.626847	Hypp_77=DZIP3	1.79	2.69	4.41	3.34	0.81
WHL22.626914	Amy2a-2=AMY1B	4.00	1.98	5.68	3.60	0.69
WHL22.627067	Abcg9=ABCG8	3.13	2.10	1.28	1.18	-1.06
WHL22.628104	SPU_026523=GOLGA8G	7.93	6.18	12.38	9.38	0.62
WHL22.629487	SPU_003007=C9orf30	1.65	4.57	3.70	5.93	0.77
WHL22.630176	Pdia5=PDIA5	111.63	62.89	63.82	47.90	-0.60
WHL22.631744	Hypp_1618=FAM154A	82.29	104.80	54.28	69.15	-0.60
WHL22.632305	NA=PCSK9	8.47	3.28	13.78	10.38	1.18
WHL22.632614	Hypp_2011=SLC25A48	3.09	9.69	11.09	13.97	1.19
WHL22.634012	Gst12=HPGDS	7.07	5.58	24.50	7.79	1.14
WHL22.634179	Galr2L_16=GALR2	3.10	4.93	5.03	7.32	0.64
WHL22.635143	Hypp_2956=HMCN1	17.37	26.24	34.23	50.23	0.96
WHL22.635333	Ip3r_1=ITPR1	5.45	3.96	3.47	2.59	-0.63
WHL22.636102	Nudt12-2=NUDT12	1.67	2.95	2.65	4.48	0.64
WHL22.636303	KmanL=MEGF8	28.78	16.63	17.59	11.23	-0.64
WHL22.637509	SPU_025328=KCNIP4	9.32	8.66	12.77	14.61	0.60
WHL22.637512	SPU_025329=NEURL1B	36.26	90.65	61.79	130.00	0.65
WHL22.638076	SPU_022910=PLEKHM2	4.10	4.02	3.16	2.16	-0.64
WHL22.638925	Slc46a3_1=SLC46A1	42.68	41.26	92.20	75.55	0.99
WHL22.639210	Z55=IKZF5	63.75	55.82	42.04	35.22	-0.63
WHL22.639346	SPU_004483=DOCK9	8.06	13.39	6.44	6.07	-0.73
WHL22.639706	Abhd4=ABHD5	46.83	147.84	96.53	193.69	0.72
WHL22.63993	SPU_007051=PRG4	25.81	36.32	48.42	55.60	0.76
WHL22.640020	NA=GLI2	8.12	6.59	4.52	2.45	-1.14
WHL22.640186	SPU_001798=RABGGTA	7.30	6.32	10.77	11.11	0.69
WHL22.641127		2.65	4.66	3.81	14.80	1.09
WHL22.641275	Gcnt2_1=GCNT2	18.74	15.52	31.02	34.00	0.93
WHL22.641674	Hypp_502=FAM38A	6.78	2.98	10.13	6.75	0.88
WHL22.64170	Hypp_1432=GOLGA6L2	1.39	1.48	2.79	3.45	1.11
WHL22.642085	AnL18=BMP1	9.21	2.13	4.87	1.68	-0.63
WHL22.644014	Ldlaf=LRFN2	41.25	16.61	16.40	10.56	-0.99
WHL22.644485	SPU_020270=MTOR	6.85	4.92	4.45	3.21	-0.62
WHL22.645219	Rej7=PKD1	15.24	10.56	10.21	5.72	-0.73
WHL22.645298		13.13	9.04	8.53	5.08	-0.72
WHL22.645481	Hypp_2289=PDLIM4	2.30	4.37	8.84	6.41	1.25
WHL22.648909	SPU_005516=MUC2	25.44	12.49	14.04	7.09	-0.84
WHL22.649215	Wasf2=WASF2	20.75	19.67	13.39	13.42	-0.59
WHL22.649461	NA=IPPK	96.89	68.69	49.60	39.51	-0.89
WHL22.65170	Nup62=RND3	26.31	40.33	47.33	51.78	0.60
WHL22.652241	Tf=MFI2	154.07	50.94	43.76	32.78	-1.23
WHL22.652421	Trpm3_4=TRPM3	9.73	6.76	5.10	3.87	-0.86
WHL22.653019	Sea/Egf/Hyalinl=SVEP1	53.53	24.91	25.82	12.87	-1.00
WHL22.653671	NA=MN1	12.74	17.34	9.17	7.69	-0.82
WHL22.653729	NA=GDPD1	13.25	27.03	25.18	48.60	0.89
WHL22.653746	NA=GDPD1	13.36	26.94	25.37	54.71	0.98
WHL22.654600	Hypp_1206=MUC2	15.37	7.35	5.09	4.03	-1.23
WHL22.654603	NA=MUC2	909.58	387.06	456.66	207.18	-0.95
WHL22.655819	Mon2-2=MON2	9.40	8.81	5.00	4.29	-0.98
WHL22.656318	NA=RSRC2	3.20	2.37	5.16	3.38	0.60
WHL22.656497	Dlc1=DLC1	36.61	16.12	19.53	10.35	-0.78
WHL22.65657	Ap1cfi2=A1CF	45.52	11.66	13.32	9.69	-1.02
WHL22.656895	SPU_006746=JUB	17.90	16.82	29.29	26.78	0.69
WHL22.65849	Gemin8=GEMIN8	8.67	13.70	16.19	17.97	0.65
WHL22.658589	Lhfp=LHFP	4.34	3.09	1.68	1.56	-1.18
WHL22.65942	Hypp_2026=MUC2	4.79	7.49	9.71	9.64	0.69
WHL22.659763	Atxn10=ATXN10	9.23	8.68	13.89	13.26	0.60
WHL22.660005	Gria1=GRIA1	0.51	0.96	2.55	2.21	1.76
WHL22.660204	MifL2=C22orf30	28.75	81.06	14.69	54.83	-0.77
WHL22.660483	SPU_002091=ARMC9	8.75	9.67	5.16	2.95	-1.23
WHL22.660958	SPU_019904=TMEM45B	10.10	8.83	4.33	4.62	-1.07
WHL22.661326	Hypp_2449=HAUS8	8.36	12.13	17.17	14.95	0.67
WHL22.661943	Btub6=TUBB2C	2.96	7.00	28.84	19.26	2.37
WHL22.661998	Igf2rL=IGF2R	8.56	9.01	4.85	4.79	-0.86
WHL22.66206	NA=USH2A	39.30	37.26	23.86	21.12	-0.77
WHL22.665132	Hypp_824=RPGR	5.16	6.70	3.21	4.15	-0.69
WHL22.6662	SPU_026983=C6orf125	21.57	28.88	41.12	41.59	0.73
WHL22.666314	Smarcd1L=SNX9	50.73	54.26	31.13	34.98	-0.67
WHL22.667198	Notch1-13=NOTCH2	6.31	4.33	4.08	2.74	-0.65
WHL22.667259		7.34	6.59	12.14	14.04	0.91
WHL22.667464	NA=NOTCH1	84.21	63.62	46.46	50.77	-0.59
WHL22.667630	Hypp_100=NOTCH2	4.76	3.69	8.70	4.66	0.60
WHL22.667741	Vnn1_1=VNN1	22.98	28.24	41.26	51.37	0.85
WHL22.667788	RasO=RRAS2	13.15	15.58	20.78	27.85	0.75
WHL22.6685	SPU_027664=GALNS	22.42	42.16	41.78	57.26	0.67
WHL22.669030	Thred_1=SRR	2.56	3.76	5.52	5.17	0.79
WHL22.673832	Cts1=CTSC	0.89	1.99	2.10	2.67	0.83
WHL22.675344	Hiat1-2=HIAT1	28.25	30.78	22.29	17.23	-0.59
WHL22.676142		300.81	363.51	660.72	723.31	1.06
WHL22.676387	NA=DMBT1	26.73	9.92	32.84	23.66	0.78
WHL22.677186	Hypp_2827=MUC17	2.67	5.39	9.07	7.88	1.16
WHL22.67921	Srd5a1_2=SRD5A1	9.79	10.39	23.94	23.55	1.23
WHL22.680250	Rab33=RAB33B	12.71	11.03	9.72	6.34	-0.59
WHL22.680854	Ubr4-4=UBR4	9.08	6.39	4.93	1.39	-1.54
WHL22.682907	Plxna4L_2=PLXNA4	2.89	2.16	7.00	2.69	0.80
WHL22.68324	Hypp_206=FAM133B	2.33	5.58	7.35	9.16	1.19
WHL22.684056	Kiaa0406L=KIAA0406	5.81	5.29	4.30	2.28	-0.82
WHL22.684085	SmG1=SMG1	14.37	7.36	7.60	4.76	-0.78
WHL22.684133	SmG1=SMG1	13.42	5.82	6.78	3.13	-0.94
WHL22.684141	LhH3h=H3F3B	4.35	7.38	17.47	10.79	1.28
WHL22.684826	SPU_013017=FAHD2A	9.41	10.08	15.75	13.92	0.60
WHL22.685463	Dkk3=DKK3	34.90	20.79	20.52	15.18	-0.61
WHL22.686659	SPU_008901=C9orf142	6.77	9.29	13.59	15.59	0.88
WHL22.687133		9.76	10.11	23.86	15.60	0.96
WHL22.687784	SPU_016196=CRLF1	3.10	3.33	5.79	5.43	0.80
WHL22.68818	SPU_016789=PLAG1	12.24	8.58	6.53	6.20	-0.69
WHL22.68849	Hypp_191=CSMD1	20.37	91.58	71.77	123.07	1.12
WHL22.688843	SPU_019952=CLEC4M	5.32	8.12	9.97	11.97	0.74
WHL22.689148	Gpr133L_2=GPR128	2.92	5.09	5.86	8.73	0.89
WHL22.689921	Axndhc6h=DNAH6	18.96	18.66	13.57	10.10	-0.69
WHL22.690139	Axndhc6h=DNAH6	27.53	24.64	16.91	16.51	-0.64
WHL22.691150	Lama5Lf=LAMA5	137.61	99.26	84.99	67.67	-0.62
WHL22.691168	LamaLf=LAMA5	126.48	96.56	75.02	60.64	-0.71
WHL22.69132	Hypp_375=PAPD5	12.90	7.47	8.92	3.76	-0.76
WHL22.692182	Grf1l=GRLF1	14.56	17.01	9.40	8.87	-0.78
WHL22.692210	Rhogap5=ARHGAP5	15.25	19.89	10.00	12.67	-0.63
WHL22.692383	Slc2a5_1=SLC2A1	1.59	2.50	5.90	3.72	1.23
WHL22.692903	Drd1L_1=DRD1	6.98	3.69	3.28	2.82	-0.74
WHL22.693732	Kiaa0430L=KIAA0430	4.45	5.81	3.47	3.15	-0.62
WHL22.693813	Hyalin1=SVEP1	116.98	188.05	73.88	35.94	-1.53
WHL22.694259	Hyalin1=DSPP	180.04	293.07	112.59	55.52	-1.54
WHL22.694432	Hypp_1184=LOR	49.40	76.72	37.13	37.95	-0.71
WHL22.694693	Hypp_2573=WIPF3	7.35	21.37	14.24	28.86	0.69
WHL22.696765	NA=GABRB2	3.23	8.16	5.37	12.04	0.65
WHL22.697356	Z331=ZNF84	4.17	9.48	8.01	13.50	0.72
WHL22.698349	Dm3=BCL11A	12.74	29.59	24.62	36.58	0.63
WHL22.698752	PaxB=PAX2	216.23	192.74	153.31	119.18	-0.59
WHL22.698805	Ghitm=GHITM	40.05	32.55	48.30	62.11	0.60
WHL22.701317		0.41	2.52	2.75	5.58	1.95
WHL22.701494	Pddc1=PDDC1	5.41	7.24	14.66	11.08	1.02
WHL22.701564	Hypp_2286=POU6F2	3.41	2.42	1.97	1.60	-0.70
WHL22.702536	NA=KSR1	4.54	1.67	6.02	2.91	0.60
WHL22.702566	Ihpk2_1=IP6K3	58.90	51.98	33.65	40.12	-0.59
WHL22.70450	Spsc3h=SPCS3	170.51	123.50	239.42	209.31	0.62
WHL22.70453		64.06	68.24	117.51	162.53	1.06
WHL22.704644		5.33	5.82	10.20	13.54	1.08
WHL22.70492	NA=NUP205	21.77	28.85	11.51	16.68	-0.85
WHL22.70561	Gcnt1_1=GCNT4	8.70	10.35	13.43	15.51	0.60
WHL22.705878	NA=ERVWE1	224.58	134.84	409.94	176.00	0.62
WHL22.706959	Plekhg5=MYO9B	7.37	8.70	5.13	5.48	-0.59
WHL22.708137	SPU_010340=USP8	21.37	22.19	15.29	12.08	-0.68
WHL22.708281	NA=USP2	19.47	18.25	13.16	9.47	-0.76
WHL22.708302	Abl=ABL1	3.75	3.44	2.47	1.87	-0.74
WHL22.710415	SPU_027658=TPMT	12.10	6.63	23.82	10.02	0.79
WHL22.710582	TRIO=TRIO	9.12	7.78	6.30	4.89	-0.60
WHL22.711055	NA=SPC25	27.59	56.13	50.38	80.34	0.70
WHL22.712423	NA=PRR12	0.78	4.40	6.33	6.20	1.75
WHL22.713378	NA=KCNMA1	49.01	39.78	31.94	24.80	-0.65
WHL22.713685	GadD45=GADD45A	59.56	49.59	105.83	66.74	0.63
WHL22.71383	Mals_1=C12orf51	7.39	9.08	14.08	18.06	0.96
WHL22.7143	SPU_010444=CENPB	1.23	6.03	3.17	9.22	0.99
WHL22.714762	SPU_022512=MSI2	269.58	288.04	177.57	167.11	-0.70
WHL22.718107	SPU_019814=SGSH	6.47	4.97	11.04	10.31	0.91
WHL22.719694	Usp34-2=USP34	9.06	8.60	5.86	4.81	-0.73
WHL22.720032	Il1r/Rs1=TPRXL	7.32	26.64	24.19	55.57	1.39
WHL22.72017	SPU_024863=YPEL2	186.00	239.44	332.95	342.15	0.68
WHL22.720249	SPU_000429=UBE2T	2.99	7.29	7.73	10.90	0.98
WHL22.721889	Dnm2=DNM1	67.88	100.89	53.41	56.87	-0.59
WHL22.723813	Ddx42=DDX42	11.16	13.69	19.93	19.79	0.69
WHL22.723852	Ddx42_1=DDX42	14.64	17.77	24.07	24.63	0.59
WHL22.724290		11.08	12.50	18.77	20.54	0.74
WHL22.724372	Hypp_1263=GRHPR	41.45	33.95	74.22	59.97	0.83
WHL22.72474	Taf12=TAF12	22.81	27.85	37.80	49.23	0.77
WHL22.725001	NA=HVCN1	4.84	4.25	8.89	8.12	0.91
WHL22.726786	Tpcn2=TPCN2	6.11	5.91	4.64	2.96	-0.70
WHL22.727269	SPU_012236=C10orf27	37.32	55.83	28.28	32.58	-0.59
WHL22.727580	SPU_028637=CARHSP1	12.84	11.12	28.98	22.58	1.09
WHL22.727662	SPU_028345=ZNF621	1.12	4.25	10.48	5.61	1.81
WHL22.72778	SPU_003759=DSPP	3.63	7.05	6.42	9.94	0.66
WHL22.727929	Ddm36L=PRTG	6.99	6.69	4.58	3.35	-0.80
WHL22.728214	Ddm36L=IGDCC4	8.12	8.54	5.50	4.82	-0.70
WHL22.728895	NA=MTERFD2	23.44	34.92	42.32	44.12	0.59
WHL22.728900	NA=LAMA5	182.03	100.91	104.84	66.39	-0.70
WHL22.729714	SPU_017485=TXN	11.76	12.12	6.45	5.63	-0.99
WHL22.7302		13.20	10.99	20.09	17.86	0.66
WHL22.731450	SPU_007552=ITSN1	9.19	20.05	5.67	14.40	-0.59
WHL22.731635	Dgkz=DGKZ	3.83	2.51	2.02	1.42	-0.87
WHL22.731889	Coq7=COQ7	24.93	21.30	35.68	34.22	0.60
WHL22.732581	Tsg=TWSG1	140.08	100.97	82.46	75.11	-0.59
WHL22.734317	NA=ARHGAP8	5.70	4.74	3.22	3.66	-0.59
WHL22.736622	NA=SHH	9.37	17.37	21.71	33.87	1.08
WHL22.738113	Taf1=NAGA	13.13	28.38	25.36	34.43	0.61
WHL22.738347	NA=LRRC61	6.90	7.80	11.32	12.13	0.68
WHL22.738545	SPU_027997=ARHGEF17	10.23	5.31	5.31	4.35	-0.62
WHL22.738996	NA=PLA2G1B	9.30	15.77	19.65	23.66	0.83
WHL22.739581	Nkx2.1=NKX2-1	60.40	32.77	32.54	22.61	-0.72
WHL22.741299	Slc39a12=SLC39A12	412.57	247.79	214.49	149.97	-0.83
WHL22.741333		106.07	152.40	217.01	189.16	0.67
WHL22.741762		9.13	5.73	12.07	10.34	0.62
WHL22.742125	Taf5L=TAF5L	1.79	4.17	3.64	5.13	0.66
WHL22.742473	Pdia6=PDIA6	330.91	252.73	172.66	189.02	-0.68
WHL22.743718	Hypp_1247=PCGF1	16.80	3.18	12.33	1.78	-0.65
WHL22.74376	Trmt5=TRMT5	6.24	9.36	12.89	11.84	0.70
WHL22.745450	Rcc2=RCC2	82.63	61.02	50.01	27.46	-0.93
WHL22.745455	Rcc2=RCC2	126.02	112.44	81.17	50.53	-0.89
WHL22.74614	Aspapd=DNPEP	55.74	42.48	117.68	98.69	1.15
WHL22.747452	Nsun4_1=NSUN4	5.07	8.66	10.08	10.50	0.64
WHL22.748036	Akrf_4=AKR1B1	24.09	25.11	43.03	45.52	0.85
WHL22.748042	Akrf_2=AKR1C2	15.70	18.74	34.95	33.78	1.00
WHL22.748078	CycJ=CCNJ	1.92	4.03	5.44	6.33	1.07
WHL22.74846	Ncapg2=NCAPG2	30.52	29.76	52.00	55.42	0.83
WHL22.748659	Slc18a2=SLC18A2	1.36	5.06	6.35	8.92	1.52
WHL22.748665	Slc18a2=SLC18A2	1.40	6.20	5.25	7.66	1.11
WHL22.749557		8.42	6.38	12.44	12.02	0.74
WHL22.75004		45.59	15.04	60.62	47.03	1.03
WHL22.751821	Cytb561=CYBASC3	22.16	38.41	38.21	56.07	0.67
WHL22.752069	Z262=ZNF782	2.46	5.37	29.34	23.24	2.84
WHL22.752781		3.76	2.89	7.05	3.79	0.65
WHL22.755821	SPU_024931=C14orf126	8.83	12.17	17.04	14.95	0.62
WHL22.756120	Med17=MED17	7.56	11.82	14.29	14.88	0.62
WHL22.756176	Cd38=CD38	23.93	34.63	43.53	49.25	0.69
WHL22.756389	Siah=SIAH1	22.13	25.35	16.61	13.34	-0.67
WHL22.756557	NA=RBPMS	243.64	105.42	302.88	273.23	0.84
WHL22.756714	Hypp_262=GPR64	2.32	7.67	8.39	10.08	1.12
WHL22.756779	NA=HNF4A	0.23	3.45	3.52	13.36	2.94
WHL22.756784	NA=MAP3K12	0.09	3.34	8.56	24.47	4.71
WHL22.756842	NA=MYCBP2	5.31	4.73	3.33	3.01	-0.66
WHL22.757086	MacpfB3=C9	187.47	122.90	236.97	266.94	0.73
WHL22.757223	SPU_015102=PARG	10.46	12.30	14.27	21.88	0.64
WHL22.757777	NA=DSPP	3100.83	1612.03	3866.18	4488.84	0.90
WHL22.758549	SPU_011419=FOXE1	64.60	46.02	143.30	95.06	1.10
WHL22.758629	SPU_011420=FOXE1	24.35	25.73	58.15	38.87	0.93
WHL22.759353	AnL11=AC008735.1	0.45	2.48	2.44	3.30	1.43
WHL22.759723	Slc10a2_2=SLC10A2	16.82	23.17	12.82	13.32	-0.59
WHL22.760476	NA=EHMT2	51.66	98.56	115.47	128.88	0.77
WHL22.761240	Pcna=PCNA	112.05	109.39	171.98	171.41	0.64
WHL22.762632	NA=THOC1	1.23	2.31	2.73	3.27	0.82
WHL22.763183	Alkbh7=ALKBH7	2.23	7.82	6.88	9.59	0.96
WHL22.763516	Elovl6_4=ELOVL6	11.47	7.78	17.67	13.61	0.72
WHL22.763956	Hemic1=HMCN1	6.52	3.09	3.20	2.41	-0.70
WHL22.764002	Sass6=SASS6	15.55	24.15	29.11	31.97	0.65
WHL22.7647		29.92	51.86	67.14	149.04	1.34
WHL22.768317	NA=TPRXL	4.51	7.60	7.68	11.27	0.67
WHL22.768321	Spry/Socscp=SPSB4	96.49	151.21	174.30	217.29	0.69
WHL22.768392	SPU_026619=ETHE1	2.03	13.06	3.85	15.96	0.60
WHL22.768948	SPU_010896=NUPL2	4.03	7.98	8.64	10.24	0.73
WHL22.771234	Nr1h6b=NR1H4	9.52	5.97	5.20	4.56	-0.63
WHL22.77301	RorL=ROR1	18.49	17.83	11.68	11.29	-0.66
WHL22.77307	Pdcd2L=PDCD2L	1.94	4.48	3.43	5.87	0.60
WHL22.78220	NA=CENPV	3.45	3.88	7.91	6.09	0.93
WHL22.78576	SPU_018453=HUWE1	5.58	7.70	8.80	14.69	0.80
WHL22.80023	NA=MAML2	6.50	9.14	17.01	22.59	1.35
WHL22.83120		4.81	7.55	12.23	12.65	1.04
WHL22.84419	Hypp_3004=C14orf4	39.48	135.05	89.32	181.60	0.80
WHL22.84695	March8l=MARCH8	3.34	3.40	2.12	2.19	-0.65
WHL22.84737	Polb=POLB	28.92	25.68	62.59	36.92	0.82
WHL22.87181	NA=A2LD1	2.16	4.39	6.19	5.58	0.94
WHL22.88793	Wipf1L=WIPF2	11.84	18.73	9.55	7.31	-0.83
WHL22.89123	NA=C8orf33	4.83	4.40	3.43	2.65	-0.61
WHL22.8923	Wnt8=WNT8A	291.92	302.37	471.84	484.47	0.69
WHL22.8926	Hypp_1768=TTC33	4.88	5.88	8.55	8.73	0.69
WHL22.89800	SPU_012409=ROD1	155.92	107.88	93.15	73.92	-0.65
WHL22.90207	Hypp_975=TLR6	1.20	1.51	4.64	3.21	1.52
WHL22.90288	Fbxl4=FBXL4	31.04	67.47	78.56	92.79	0.90
WHL22.90291	Fbxl4=FBXL4	44.57	81.59	111.19	139.89	1.05
WHL22.9369	Awh=LHX8	17.52	25.55	13.90	12.96	-0.66
WHL22.96226	RasaL2=DAB2IP	36.19	56.87	62.81	89.81	0.73
WHL22.96314	NA=TRPC4	7.12	3.15	3.79	2.40	-0.65
WHL22.96344	SPU_013133=MUC2	7.61	14.21	6.23	7.23	-0.63
WHL22.96467	Ascc2=ASCC2	3.94	5.91	5.73	10.27	0.67
WHL22.96981	SPU_017334=OSTM1	5.80	11.80	11.65	18.69	0.83
WHL22.97577	Hypp_2017=PRB3	45.63	62.94	80.77	84.82	0.62
WHL22.98502	SPU_007307=MEGF6	6.47	3.97	3.19	2.13	-0.96
WHL22.98675	Hypp_2983=RPGR	1.51	3.11	3.29	4.71	0.86
WHL22.98750	NA=CYP51A1	16.65	29.55	27.75	63.95	0.93
WHL22.99381	Megf6=MEGF6	6.25	6.08	4.65	3.05	-0.71
WHL22.99453	SPU_009351=TPRXL	9.05	4.45	3.78	3.11	-0.89
WHL22.99505	He2=MMP19	101.39	609.09	651.96	1223.51	1.85
WHL22.99508	He1=MMP19	127.51	683.53	873.59	1757.36	2.07
WHL22.99629	Apex2=APEX2	3.81	7.61	8.59	11.23	0.86
